# Supplementary material for: Synthesis, Fungitoxic Activity against Botrytis cinerea and Phytotoxicity of Alkoxyclovanols and Alkoxyisocaryolanols
Source: MDPI journal article supplement (doi:10.3390/jof7121079), 2021-12-15
Supplement: s1 [file s1]

## Supplementary Materials

### Synthesis, fungitoxic activity against *Botrytis cinerea* and phytotoxicity of alkoxyclovanols and alkoxyisocaryolanols

Adriana de Almeida Pinto Bracarense,<sup>1,2,#</sup> Jociani Ascari,<sup>1,3,#</sup> Giovanni Gontijo de Souza,<sup>1</sup> Thays Silva Oliveira,<sup>1</sup> Antonio Ruano-González,<sup>4</sup> Ana A. Pinto,<sup>4</sup> Maria Amélia Diamantino Boaventura,<sup>1</sup> Jacqueline Aparecida Takahashi,<sup>1</sup> Isidro G. Collado,<sup>4,5</sup> Rosa Durán-Patrón,<sup>\*,4</sup> and Antonio J. Macías-Sánchez<sup>\*,4,5</sup>

<sup>1</sup> Departamento de Química, Instituto de Ciências Exatas, Universidade Federal de Minas Gerais, Av. Presidente Antônio Carlos, 6627, 31270-901, Belo Horizonte, MG, Brazil.

<sup>2</sup> Departamento de Química, Centro Federal de Educação Tecnológica de Minas Gerais, Av. Amazonas, 5253, 30421-169, Belo Horizonte, MG, Brazil.

<sup>3</sup> Coordenação Ciências Biológicas, Universidade Tecnológica Federal do Paraná, Prolongamento da Rua Cerejeira, s/n, 85892-000 Santa Helena, PR, Brazil.

<sup>4</sup> Departamento de Química Orgánica, Facultad de Ciencias, Universidad de Cádiz, 11510 Puerto Real, Cádiz, Spain.

<sup>5</sup> Instituto de Investigación en Biomoléculas (INBIO), Universidad de Cádiz, 11510 Puerto Real, Cádiz, Spain.

\* Correspondence: R D-P [rosa.duran@uca.es](mailto:rosa.duran@uca.es), AJ M-S [antoniojose.macias@uca.es](mailto:antoniojose.macias@uca.es) Tel.: (+35 956 012704).

# These authors contributed equally to this work.

## Table of contents

|                                                                                                                                                   |      |
|---------------------------------------------------------------------------------------------------------------------------------------------------|------|
| Revised assignment of $^1\text{H}$ and $^{13}\text{C}$ NMR spectra and selected HMBC correlations of compound <b>2i</b> . Table S1 .....          | S5-6 |
| <b>Figure S1.</b> $^1\text{H}$ NMR spectrum of compound <b>2b</b> in $\text{CDCl}_3$ (400MHz).....                                                | S7   |
| <b>Figure S1a.</b> Expansion ( $\delta_{\text{H}}$ 3.7-0.5) of $^1\text{H}$ NMR spectrum of compound <b>2b</b> in $\text{CDCl}_3$ (400 MHz).....  | S8   |
| <b>Figure S2.</b> $^{13}\text{C}$ NMR spectrum of compound <b>2b</b> in $\text{CDCl}_3$ (100 MHz).....                                            | S9   |
| <b>Figure S2a.</b> Expansion ( $\delta_{\text{C}}$ 95-10) of $^{13}\text{C}$ NMR spectrum of compound <b>2b</b> in $\text{CDCl}_3$ (100 MHz)..... | S10  |
| <b>Figure S3.</b> $^1\text{H}$ NMR spectrum of compound <b>2d</b> in $\text{CDCl}_3$ (400 MHz).....                                               | S11  |
| <b>Figure S3a.</b> Expansion ( $\delta_{\text{H}}$ 3.7-0.5) of $^1\text{H}$ NMR spectrum of compound <b>2d</b> in $\text{CDCl}_3$ (400 MHz).....  | S12  |
| <b>Figure S4.</b> $^{13}\text{C}$ NMR spectrum of compound <b>2d</b> in $\text{CDCl}_3$ (100 MHz).....                                            | S13  |
| <b>Figure S4a.</b> Expansion ( $\delta_{\text{C}}$ 95-10) of $^{13}\text{C}$ NMR spectrum of compound <b>2d</b> in $\text{CDCl}_3$ (100 MHz)..... | S14  |
| <b>Figure S5.</b> $^1\text{H}$ NMR spectrum of compound <b>2f</b> in $\text{CDCl}_3$ (400 MHz).....                                               | S15  |
| <b>Figure S5a.</b> Expansion ( $\delta_{\text{H}}$ 3.7-0.5) of $^1\text{H}$ NMR spectrum of compound <b>2f</b> in $\text{CDCl}_3$ (400 MHz).....  | S16  |
| <b>Figure S6.</b> $^{13}\text{C}$ NMR spectrum of compound <b>2f</b> in $\text{CDCl}_3$ (100 MHz).....                                            | S17  |
| <b>Figure S6a.</b> Expansion ( $\delta_{\text{C}}$ 95-10) of $^{13}\text{C}$ NMR spectrum of compound <b>2f</b> in $\text{CDCl}_3$ (100 MHz)..... | S18  |
| <b>Figure S7.</b> $^1\text{H}$ NMR spectrum of compound <b>2g</b> in $\text{CDCl}_3$ (400 MHz).....                                               | S19  |
| <b>Figure S7a.</b> Expansion ( $\delta_{\text{H}}$ 4.2-0.5) of $^1\text{H}$ NMR spectrum of compound <b>2g</b> in $\text{CDCl}_3$ (400 MHz).....  | S20  |
| <b>Figure S8.</b> $^{13}\text{C}$ NMR spectrum of compound <b>2g</b> in $\text{CDCl}_3$ (100 MHz).....                                            | S21  |

|                                                                                                                                           |            |
|-------------------------------------------------------------------------------------------------------------------------------------------|------------|
| <b>Figure S8a.</b> Expansion ( $\delta_C$ 95-10) of $^{13}\text{C}$ NMR spectrum of compound <b>2g</b> in $\text{CDCl}_3$ (100 MHz).....  | <b>S22</b> |
| <b>Figure S9.</b> $^1\text{H}$ NMR spectrum of compound <b>2h</b> in $\text{CDCl}_3$ (400 MHz).....                                       | <b>S23</b> |
| <b>Figure S9a.</b> Expansion ( $\delta_H$ 4.2-0.5) of $^1\text{H}$ NMR spectrum of compound <b>2h</b> in $\text{CDCl}_3$ (400 MHz).....   | <b>S24</b> |
| <b>Figure S10.</b> $^{13}\text{C}$ NMR spectrum of compound <b>2h</b> in $\text{CDCl}_3$ (100 MHz).....                                   | <b>S25</b> |
| <b>Figure S10a.</b> Expansion ( $\delta_C$ 95-10) of $^{13}\text{C}$ NMR spectrum of compound <b>2h</b> in $\text{CDCl}_3$ (100 MHz)..... | <b>S26</b> |
| <b>Figure S11.</b> $^1\text{H}$ NMR spectrum of compound <b>2i</b> in $\text{CDCl}_3$ (400 MHz).....                                      | <b>S27</b> |
| <b>Figure S11a.</b> Expansion ( $\delta_H$ 4.5-0.5) of $^1\text{H}$ NMR spectrum of compound <b>2i</b> in $\text{CDCl}_3$ (400 MHz).....  | <b>S28</b> |
| <b>Figure S12.</b> $^{13}\text{C}$ NMR spectrum of compound <b>2i</b> in $\text{CDCl}_3$ (100 MHz).....                                   | <b>S29</b> |
| <b>Figure S12a.</b> Expansion ( $\delta_C$ 95-10) of $^{13}\text{C}$ NMR spectrum of compound <b>2i</b> in $\text{CDCl}_3$ (100 MHz)..... | <b>S30</b> |
| <b>Figure S13.</b> $^1\text{H}$ NMR spectrum of compound <b>4b</b> in $\text{CDCl}_3$ (400 MHz).....                                      | <b>S31</b> |
| <b>Figure S13a.</b> Expansion ( $\delta_H$ 3.8-0.5) of $^1\text{H}$ NMR spectrum of compound <b>4b</b> in $\text{CDCl}_3$ (400 MHz).....  | <b>S32</b> |
| <b>Figure S14.</b> $^{13}\text{C}$ NMR spectrum of compound <b>4b</b> in $\text{CDCl}_3$ (100 MHz).....                                   | <b>S33</b> |
| <b>Figure S14a.</b> Expansion ( $\delta_C$ 95-10) of $^{13}\text{C}$ NMR spectrum of compound <b>4b</b> in $\text{CDCl}_3$ (100 MHz)..... | <b>S34</b> |
| <b>Figure S15.</b> $^1\text{H}$ NMR spectrum of compound <b>4c</b> in $\text{CDCl}_3$ (400 MHz).....                                      | <b>S35</b> |
| <b>Figure S15a.</b> Expansion ( $\delta_H$ 3.8-0.5) of $^1\text{H}$ NMR spectrum of compound <b>4c</b> in $\text{CDCl}_3$ (400 MHz).....  | <b>S36</b> |
| <b>Figure S16.</b> $^{13}\text{C}$ NMR spectrum of compound <b>4c</b> in $\text{CDCl}_3$ (100 MHz).....                                   | <b>S37</b> |
| <b>Figure S16a.</b> Expansion ( $\delta_C$ 95-10) of $^{13}\text{C}$ NMR spectrum of compound <b>4c</b> in $\text{CDCl}_3$ (100 MHz)..... | <b>S38</b> |

|                                                                                                                                                    |            |
|----------------------------------------------------------------------------------------------------------------------------------------------------|------------|
| <b>Figure S17.</b> $^1\text{H}$ NMR spectrum of compound <b>4d</b> in $\text{CDCl}_3$ (400 MHz).....                                               | <b>S39</b> |
| <b>Figure S17a.</b> Expansion ( $\delta_{\text{H}}$ 3.8-0.5) of $^1\text{H}$ NMR spectrum of compound <b>4d</b> in $\text{CDCl}_3$ (400 MHz).....  | <b>S40</b> |
| <b>Figure S18.</b> $^{13}\text{C}$ NMR spectrum of compound <b>4d</b> in $\text{CDCl}_3$ (100 MHz).....                                            | <b>S41</b> |
| <b>Figure S18a.</b> Expansion ( $\delta_{\text{C}}$ 95-10) of $^{13}\text{C}$ NMR spectrum of compound <b>4d</b> in $\text{CDCl}_3$ (100 MHz)..... | <b>S42</b> |
| <b>Figure S19.</b> $^1\text{H}$ NMR spectrum of compound <b>4e</b> in $\text{CDCl}_3$ (400 MHz).....                                               | <b>S43</b> |
| <b>Figure S19a.</b> Expansion ( $\delta_{\text{H}}$ 3.8-0.5) of $^1\text{H}$ NMR spectrum of compound <b>4e</b> in $\text{CDCl}_3$ (400 MHz).....  | <b>S44</b> |
| <b>Figure S20.</b> $^{13}\text{C}$ NMR spectrum of compound <b>4e</b> in $\text{CDCl}_3$ (100 MHz).....                                            | <b>S45</b> |
| <b>Figure S20a.</b> Expansion ( $\delta_{\text{C}}$ 95-10) of $^{13}\text{C}$ NMR spectrum of compound <b>4e</b> in $\text{CDCl}_3$ (100 MHz)..... | <b>S46</b> |

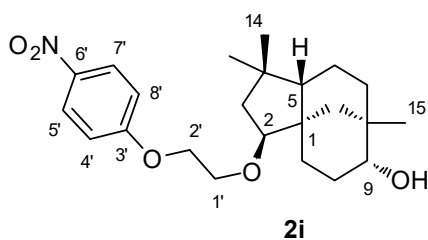

(2*S*,9*R*)-2-(2'-(*p*-nitrophenoxy)ethoxy)clovan-9-ol (**2i**):<sup>1</sup> <sup>1</sup>H NMR (CDCl<sub>3</sub>, 400 MHz), see Table S1; <sup>13</sup>C NMR (CDCl<sub>3</sub>, 100 MHz), see Table S1; HMBC (selected correlations): C-1 → H-2 $\alpha$ , H-3 $\alpha$ , H-5 $\beta$ , H-12a, H-12b; C-2 → H-3 $\alpha$ , H-3 $\beta$ , H-12a, H-12b, H-1'a,b; C-9 → H-7a, H-7b, H-11a, H-12a, H-12b, H<sub>3</sub>-15 $\beta$ ; C-1' → H-2 $\alpha$ , H<sub>2</sub>-2'; C-2' → H-1'a,b; C-3' → H<sub>2</sub>-2', H-4', H-8', H-5', H-7'; C-6' → H-4', H-8', H-5', H-7'.

---

<sup>1</sup> Saiz-Urra, L.; Racero, J. C.; Macias-Sanchez, A. J.; Hernandez-Galan, R.; Hanson, J. R.; Perez- Gonzalez, M.; Collado, I. G. *J. Agric. Food Chem.* **2009**, *57*, 2420–2428.

**Table S1. <sup>1</sup>H NMR (CDCl<sub>3</sub>, 400 MHz) and <sup>13</sup>C NMR (CDCl<sub>3</sub>, 100 MHz)****Spectroscopic Data for Compound 2i**

| Position    | 2i                                           |                                     |
|-------------|----------------------------------------------|-------------------------------------|
|             | $\delta_{\text{H}}$ , mult ( <i>J</i> in Hz) | $\delta_{\text{C}}$ , type          |
| 2 $\alpha$  | 3.47, dd (10.0, 5.6)                         | 44.38, C                            |
| 3 $\alpha$  | 1.67, dd (11.5, 5.6)                         | 89.27, CH                           |
| 3 $\beta$   | 1.51 dd (11.5, 10.5)                         | 44.45, CH <sub>2</sub>              |
| 4           |                                              | 37.10, C                            |
| 5 $\beta$   | 1.41, m                                      | 50.46, CH                           |
| 6a          | 1.40, m                                      | 20.52, CH <sub>2</sub>              |
| 6b          | 1.30, m                                      |                                     |
| 7a          | 1.37, m                                      | 33.00, CH <sub>2</sub>              |
| 7b          | 1.10, m                                      |                                     |
| 8           |                                              | 34.65, C                            |
| 9 $\beta$   | 3.29, brs                                    | 75.04, CH                           |
| 10 $\alpha$ | 1.59, m                                      | 26.00, CH <sub>2</sub>              |
| 10 $\beta$  | 1.94, tdd (14.3, 4.6, 3.4)                   |                                     |
| 11a         | 1.69, m                                      | 26.70, CH <sub>2</sub>              |
| 11b         | 1.11, m                                      |                                     |
| 12a         | 1.57, d (12.8)                               | 36.41, CH <sub>2</sub>              |
| 12b         | 0.96, brd (12.8)                             |                                     |
| 13 $\alpha$ | 0.84, <sup>a</sup> s                         | 25.35, <sup>b</sup> CH <sub>3</sub> |
| 14 $\beta$  | 1.00, <sup>a</sup> s                         | 31.22, <sup>b</sup> CH <sub>3</sub> |
| 15          | 0.92, s                                      | 28.30, CH <sub>3</sub>              |
| 1'a,b       | 3.87-3.79                                    | 68.57, CH <sub>2</sub>              |
| 2'          | 4.17, t (5.0)                                | 68.48, CH <sub>2</sub>              |
| 3'          |                                              | 164.03, C                           |
| 4', 8'      | 6.96, d (9.3)                                | 114.65, 2CH                         |
| 5', 7'      | 8.16, d (9.3)                                | 125.77, 2CH                         |
| 6'          |                                              | 141.41, C                           |

<sup>a-b</sup> Interchangeable signals

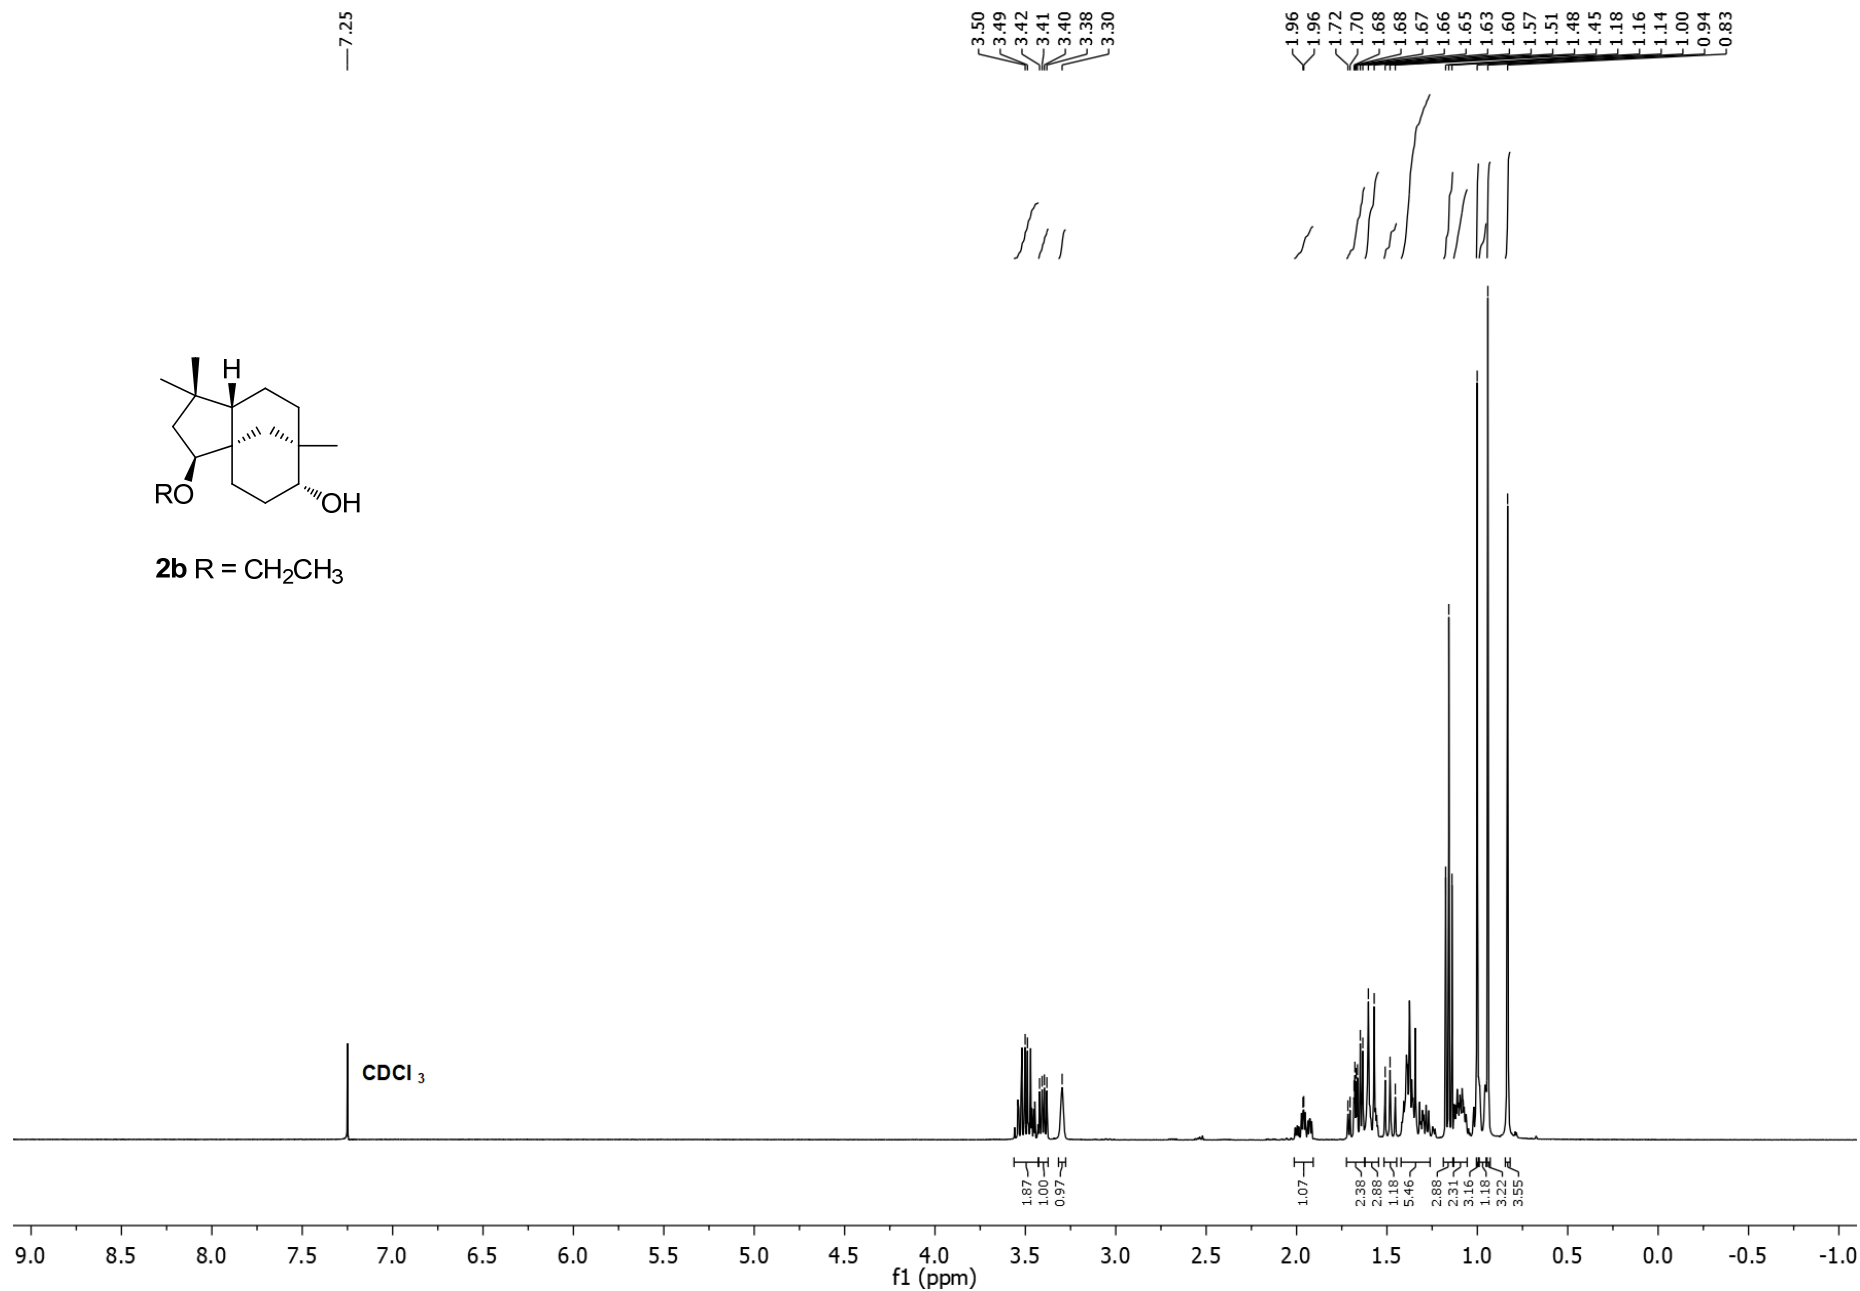

**Figure S1.**  $^1\text{H}$  NMR spectrum of compound **2b** in  $\text{CDCl}_3$  (400 MHz).

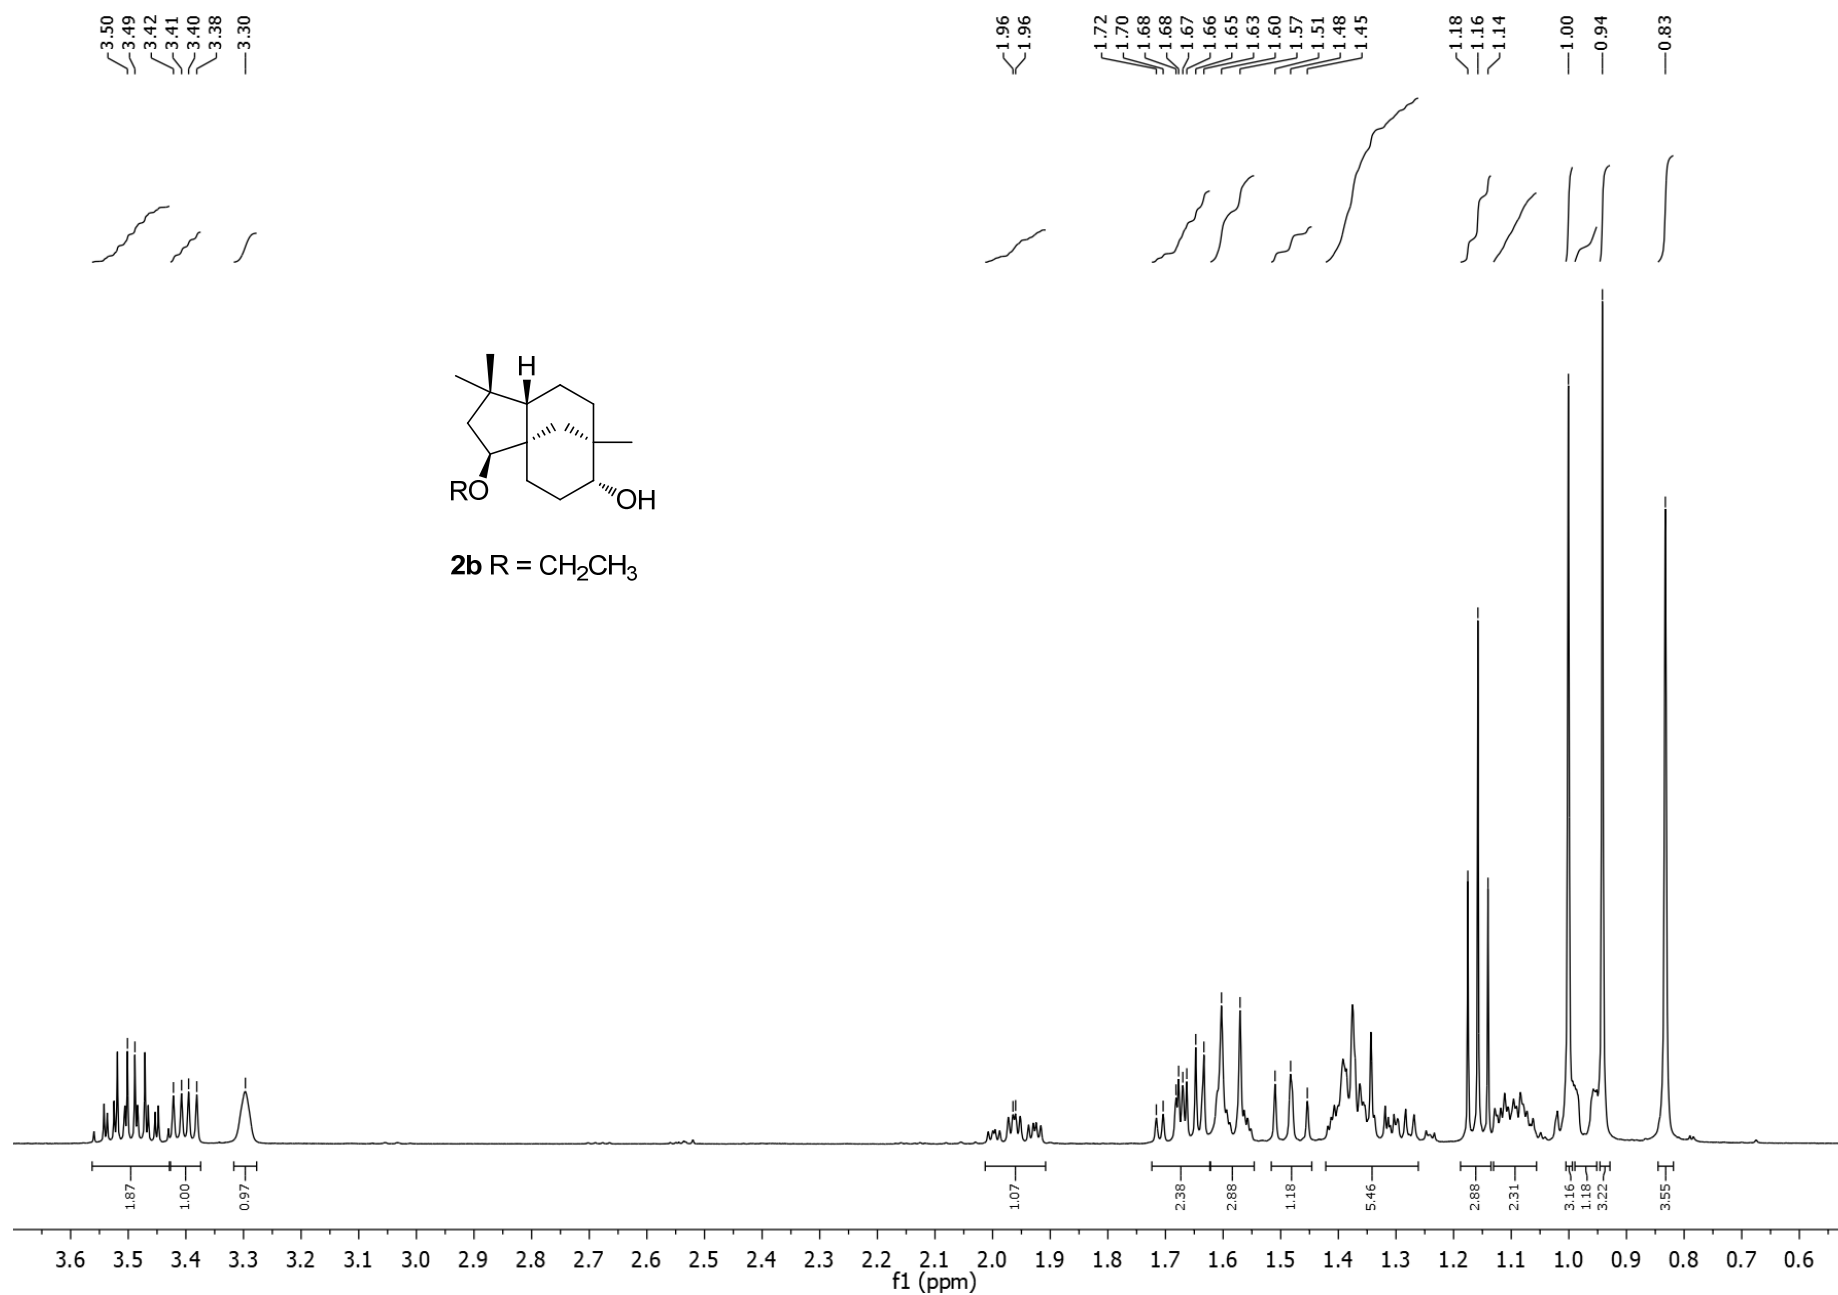

**Figure S1a.** Expansion ( $\delta_{\text{H}}$  3.7-0.5) of  $^1\text{H}$  NMR spectrum of compound **2b** in  $\text{CDCl}_3$  (400 MHz).



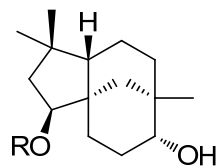

**2b** R = CH<sub>2</sub>CH<sub>3</sub>

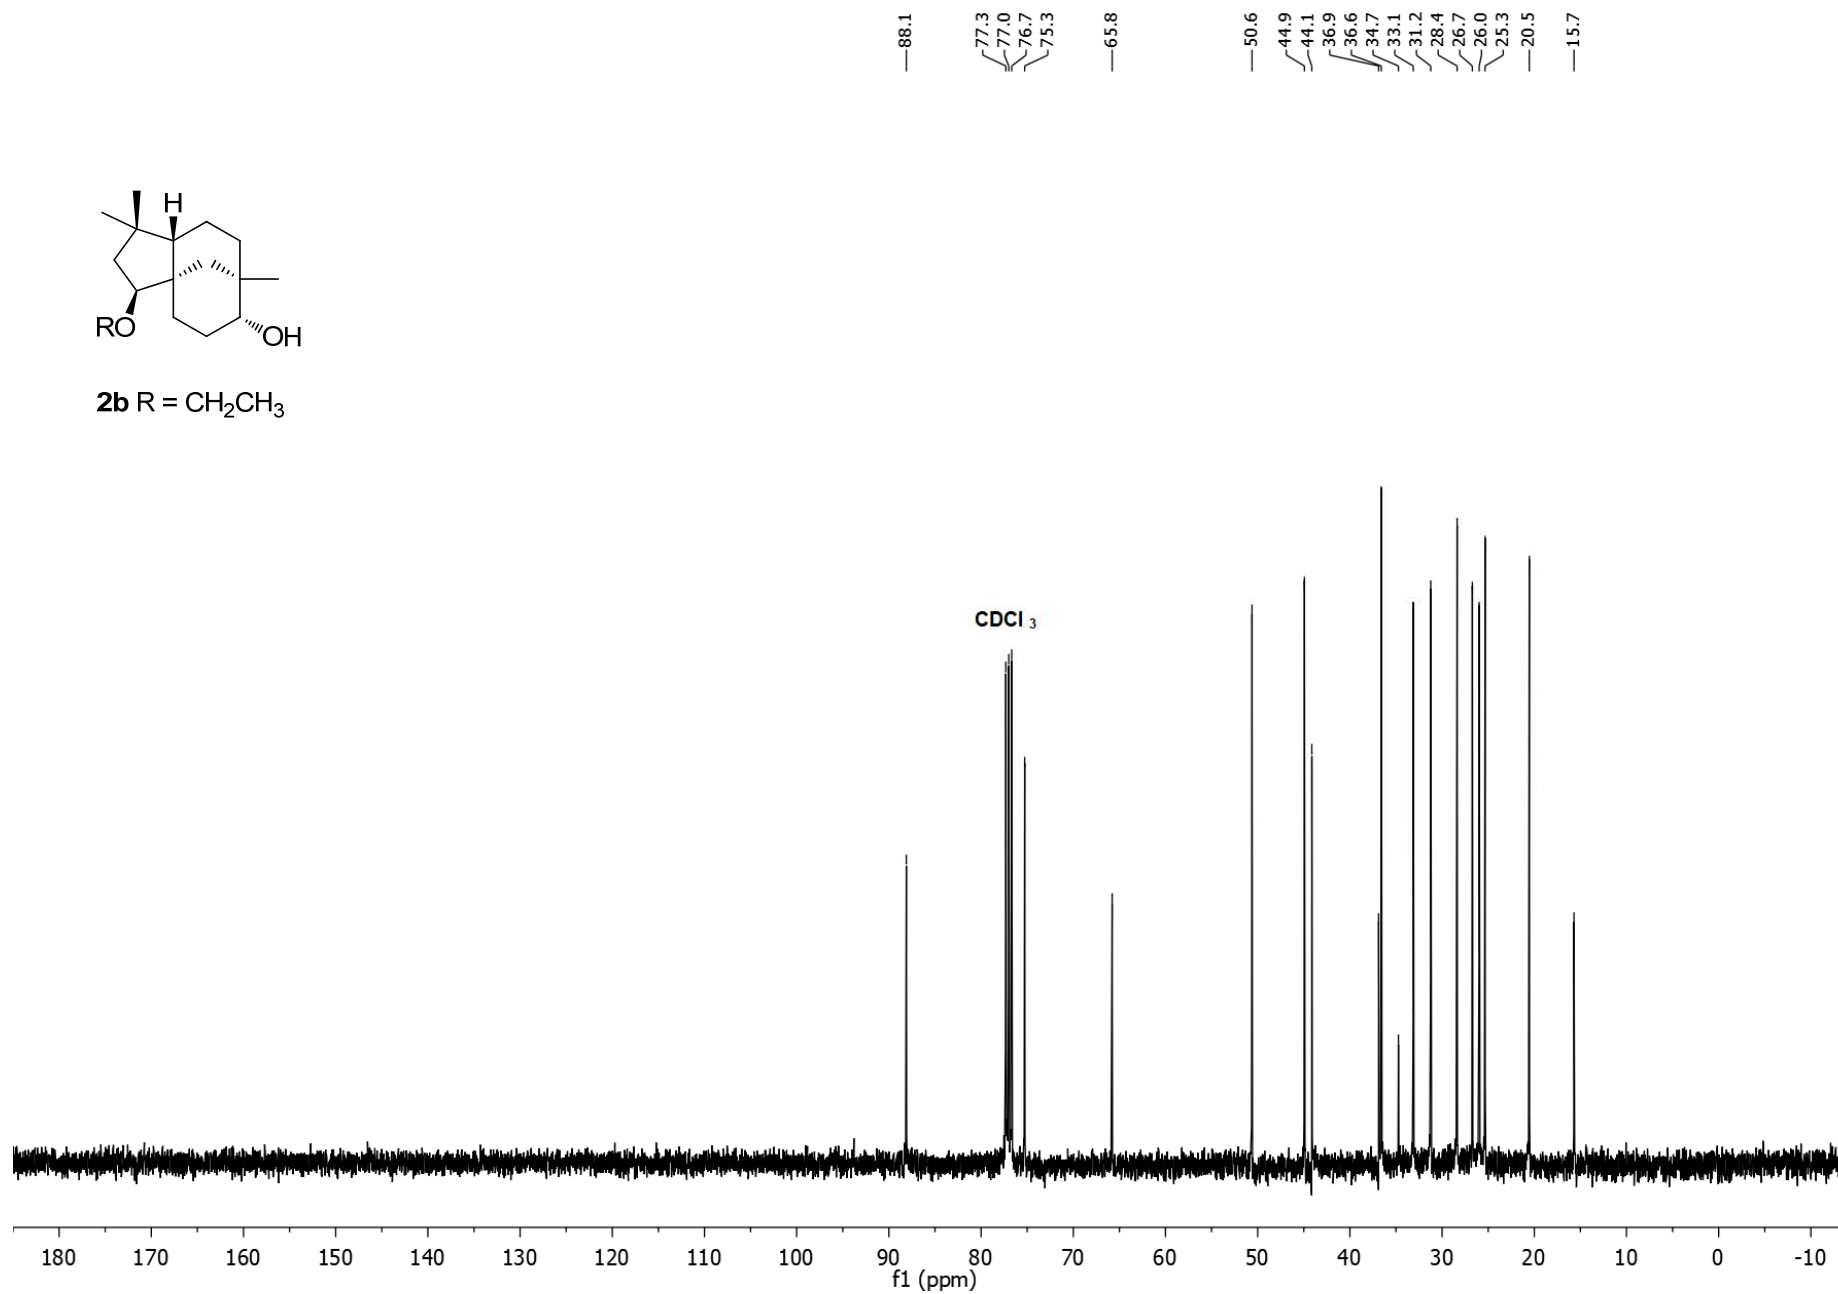

**Figure S2.** <sup>13</sup>C NMR spectrum of compound **2b** in CDCl<sub>3</sub> (100 MHz).

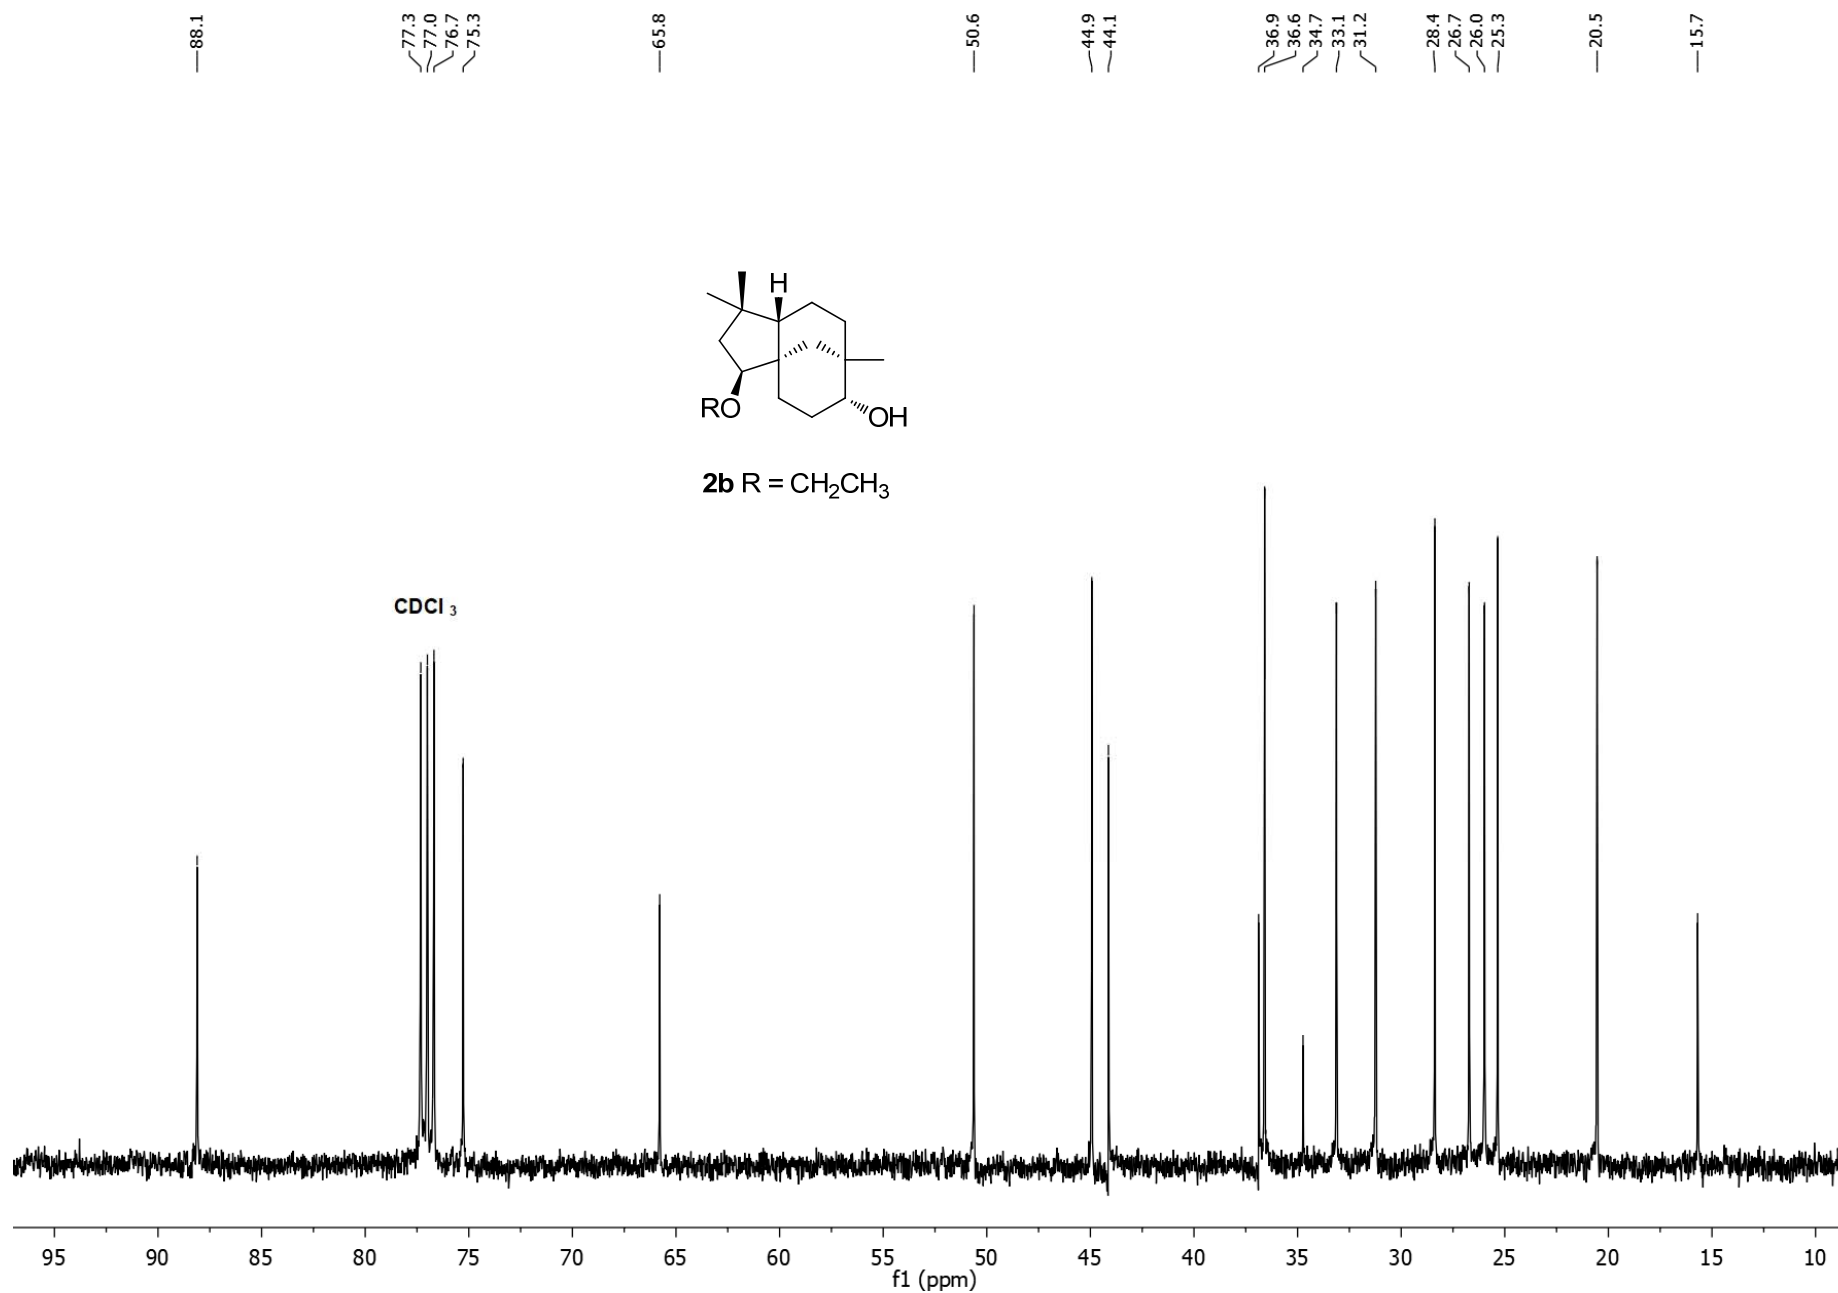

**Figure S2a.** Expansion ( $\delta_{\text{C}}$  95-10) of  $^{13}\text{C}$  NMR spectrum of compound **2b** in  $\text{CDCl}_3$  (100 MHz).

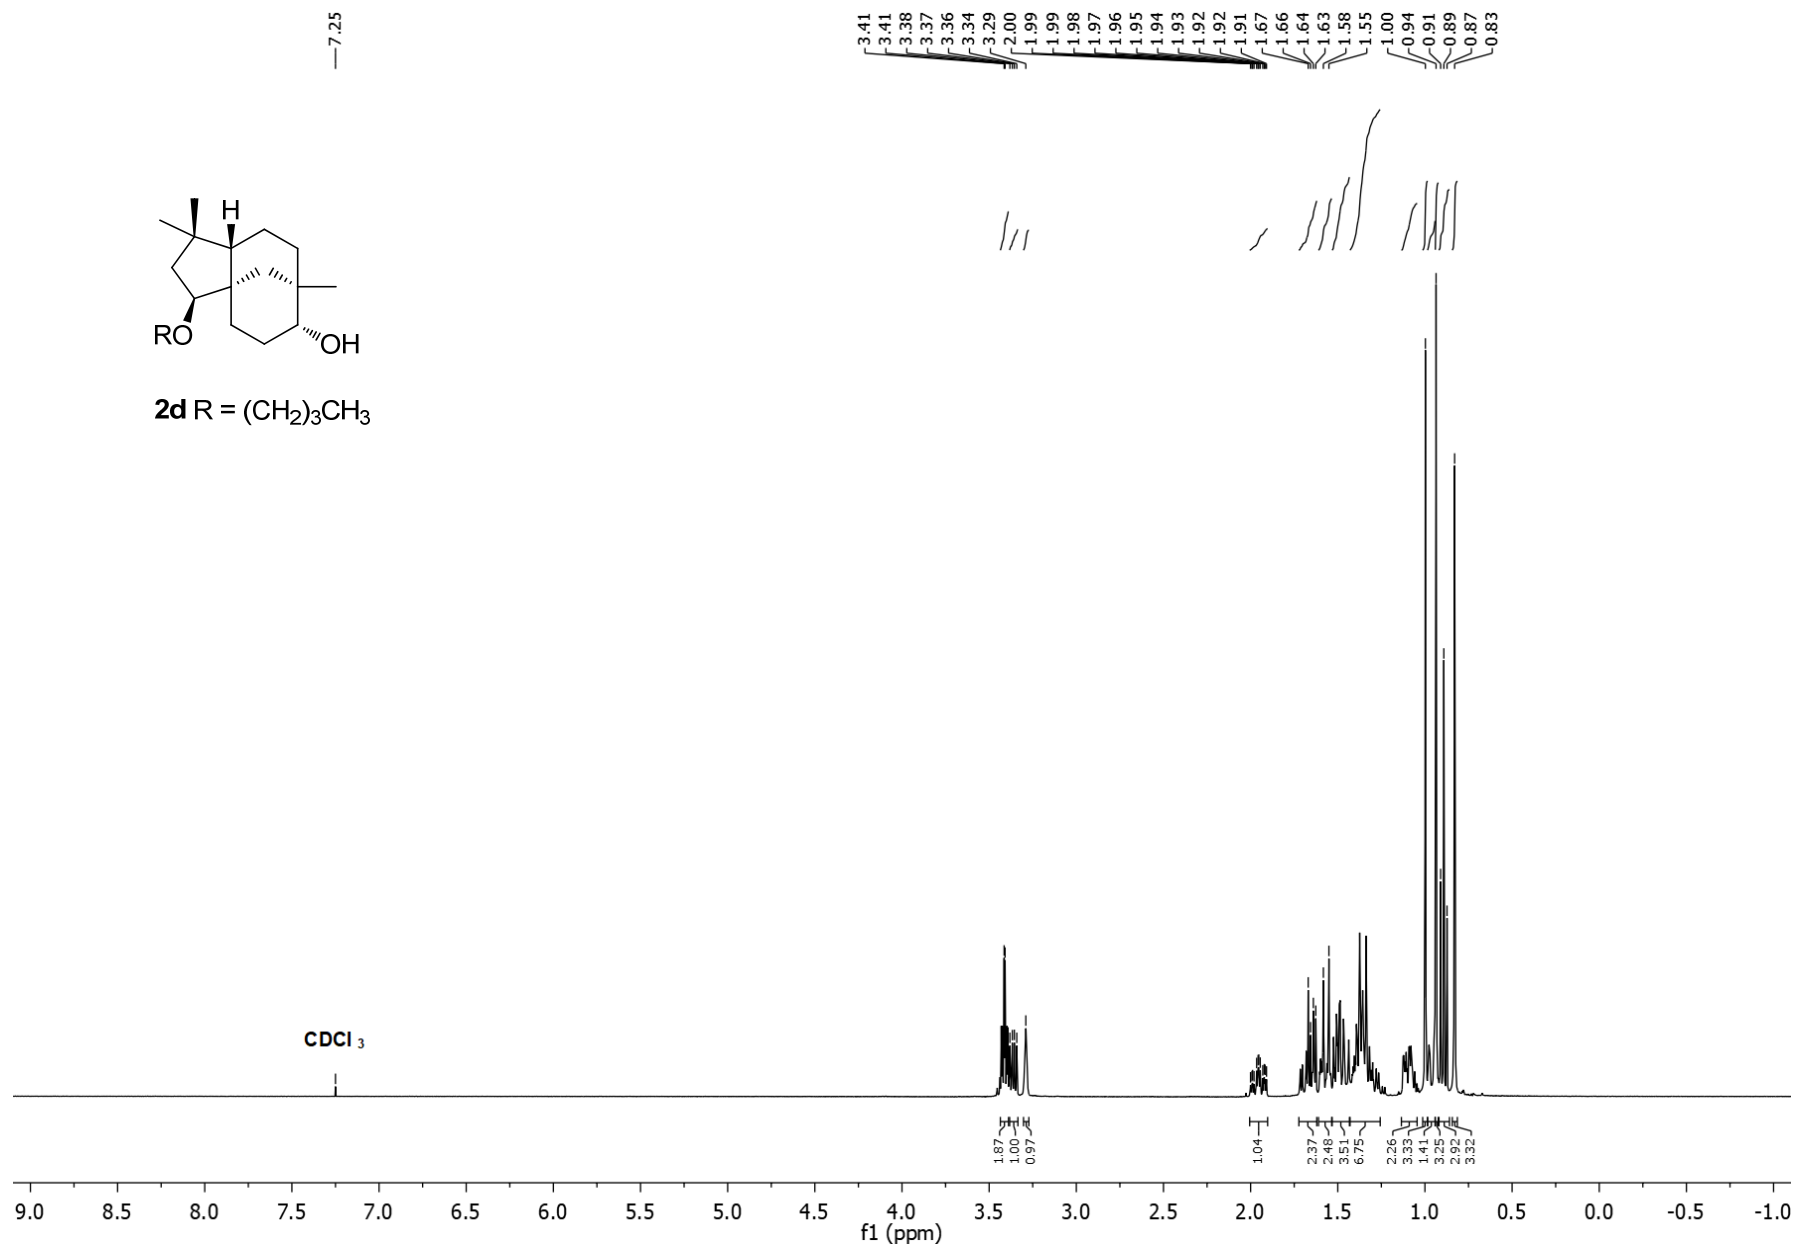

**Figure S3.**  $^1H$  NMR spectrum of compound **2d** in  $CDCl_3$  (400 MHz).

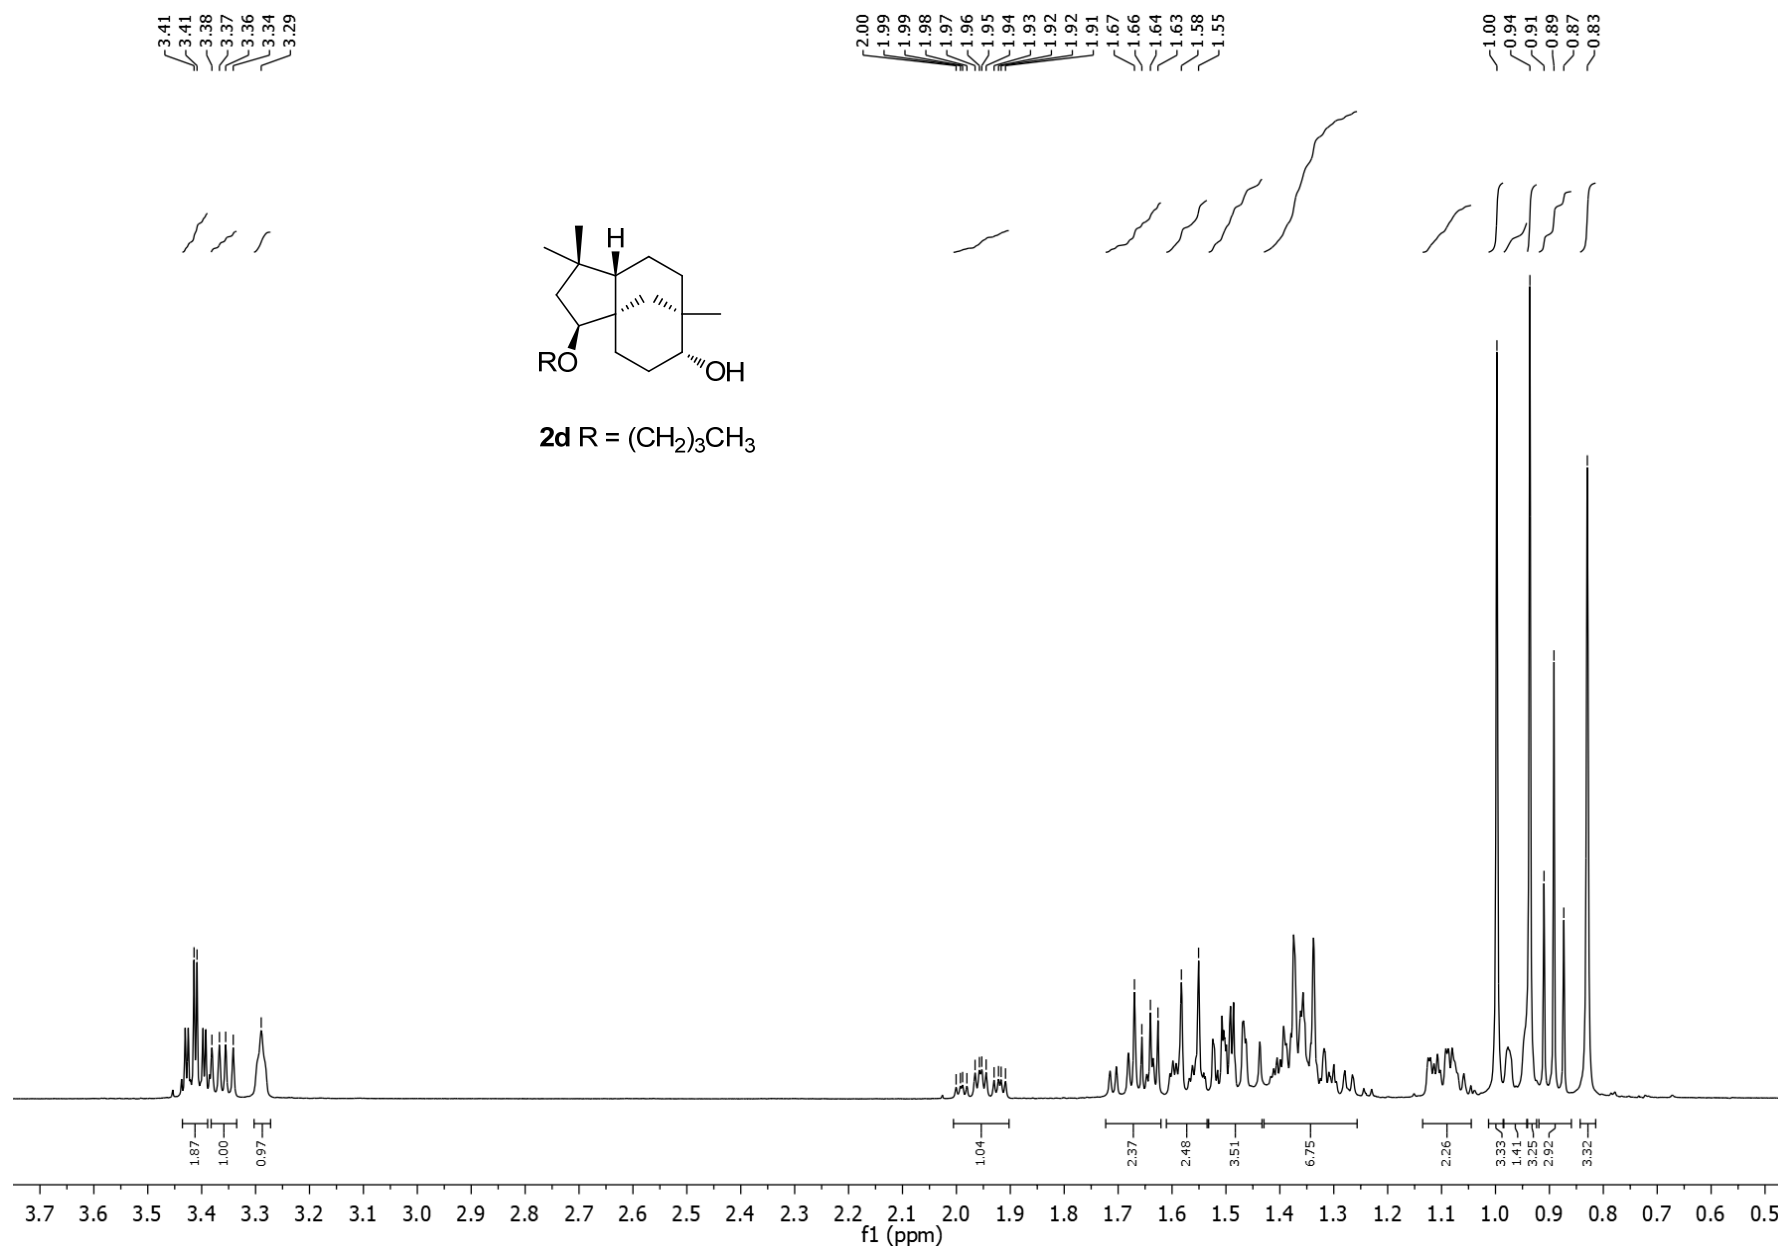

**Figure S3a.** Expansion ( $\delta_H$  3.7-0.5) of  $^1H$  NMR spectrum of compound **2d** in  $CDCl_3$  (400 MHz).

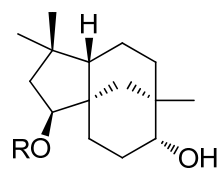

**2d** R = (CH<sub>2</sub>)<sub>3</sub>CH<sub>3</sub>

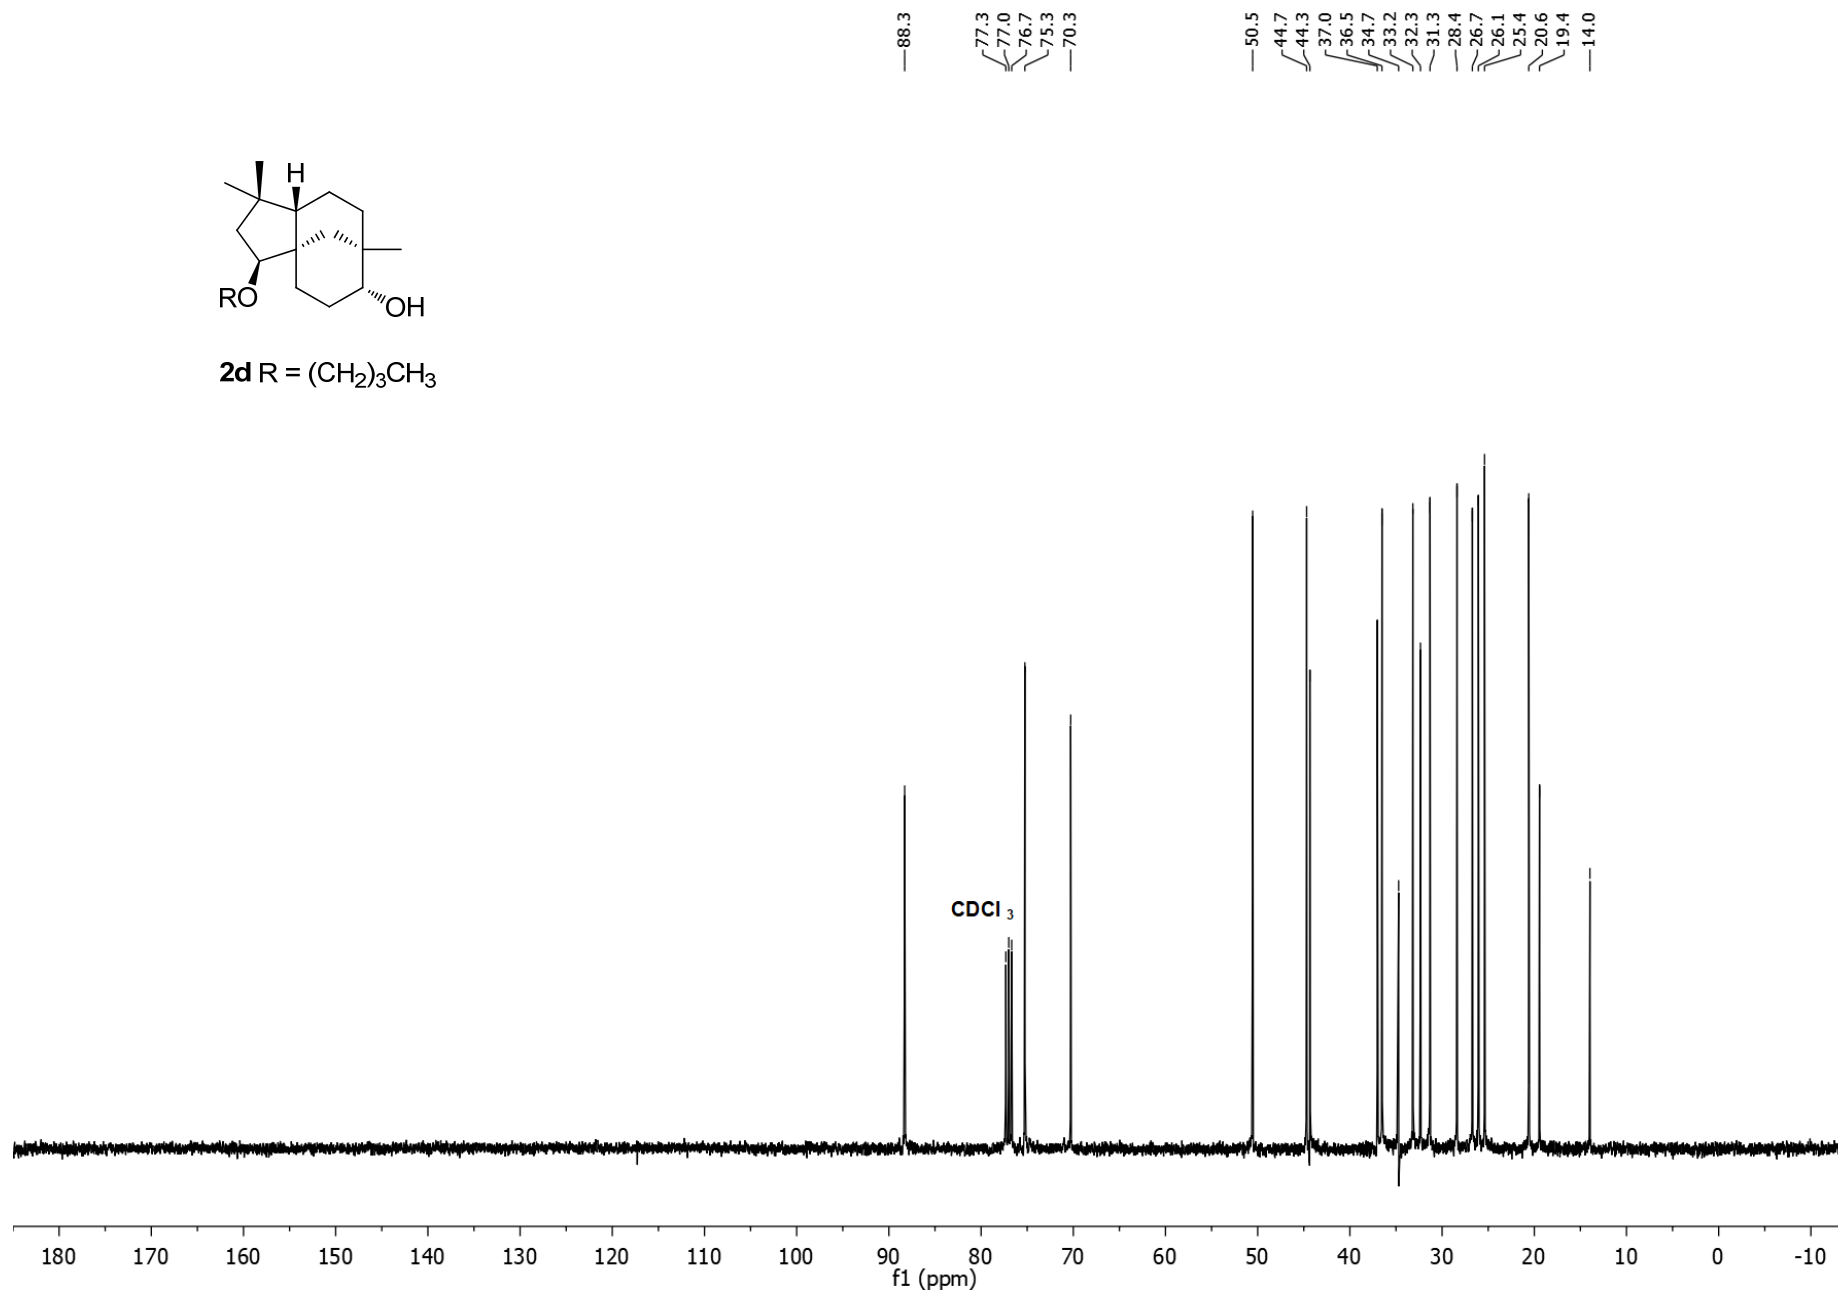

**Figure S4.** <sup>13</sup>C NMR spectrum of compound **2d** in CDCl<sub>3</sub> (100 MHz).

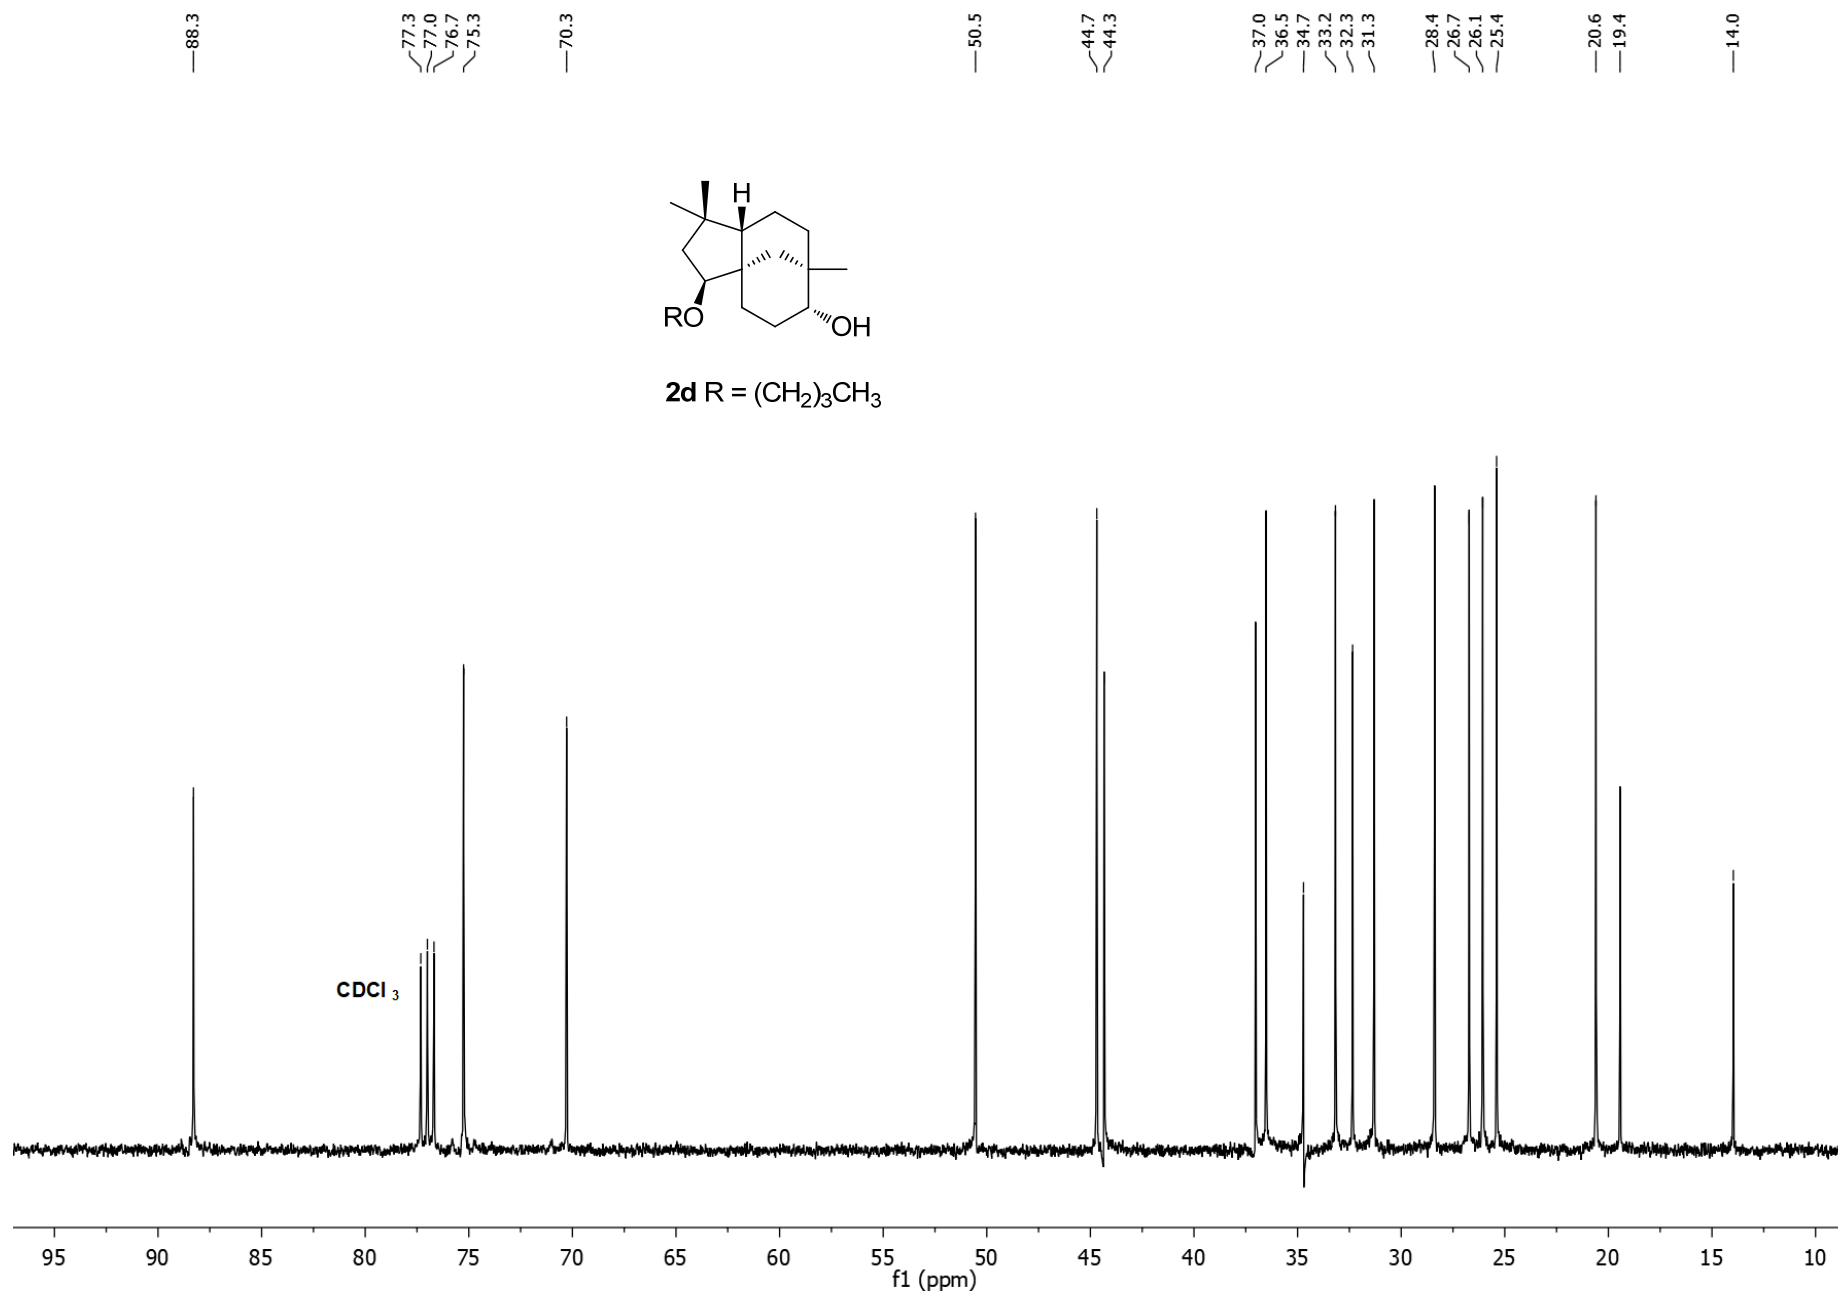

**Figure S4a.** Expansion ( $\delta_{\text{C}}$  95-10) of  $^{13}\text{C}$  NMR spectrum of compound **2d** in  $\text{CDCl}_3$  (100 MHz).

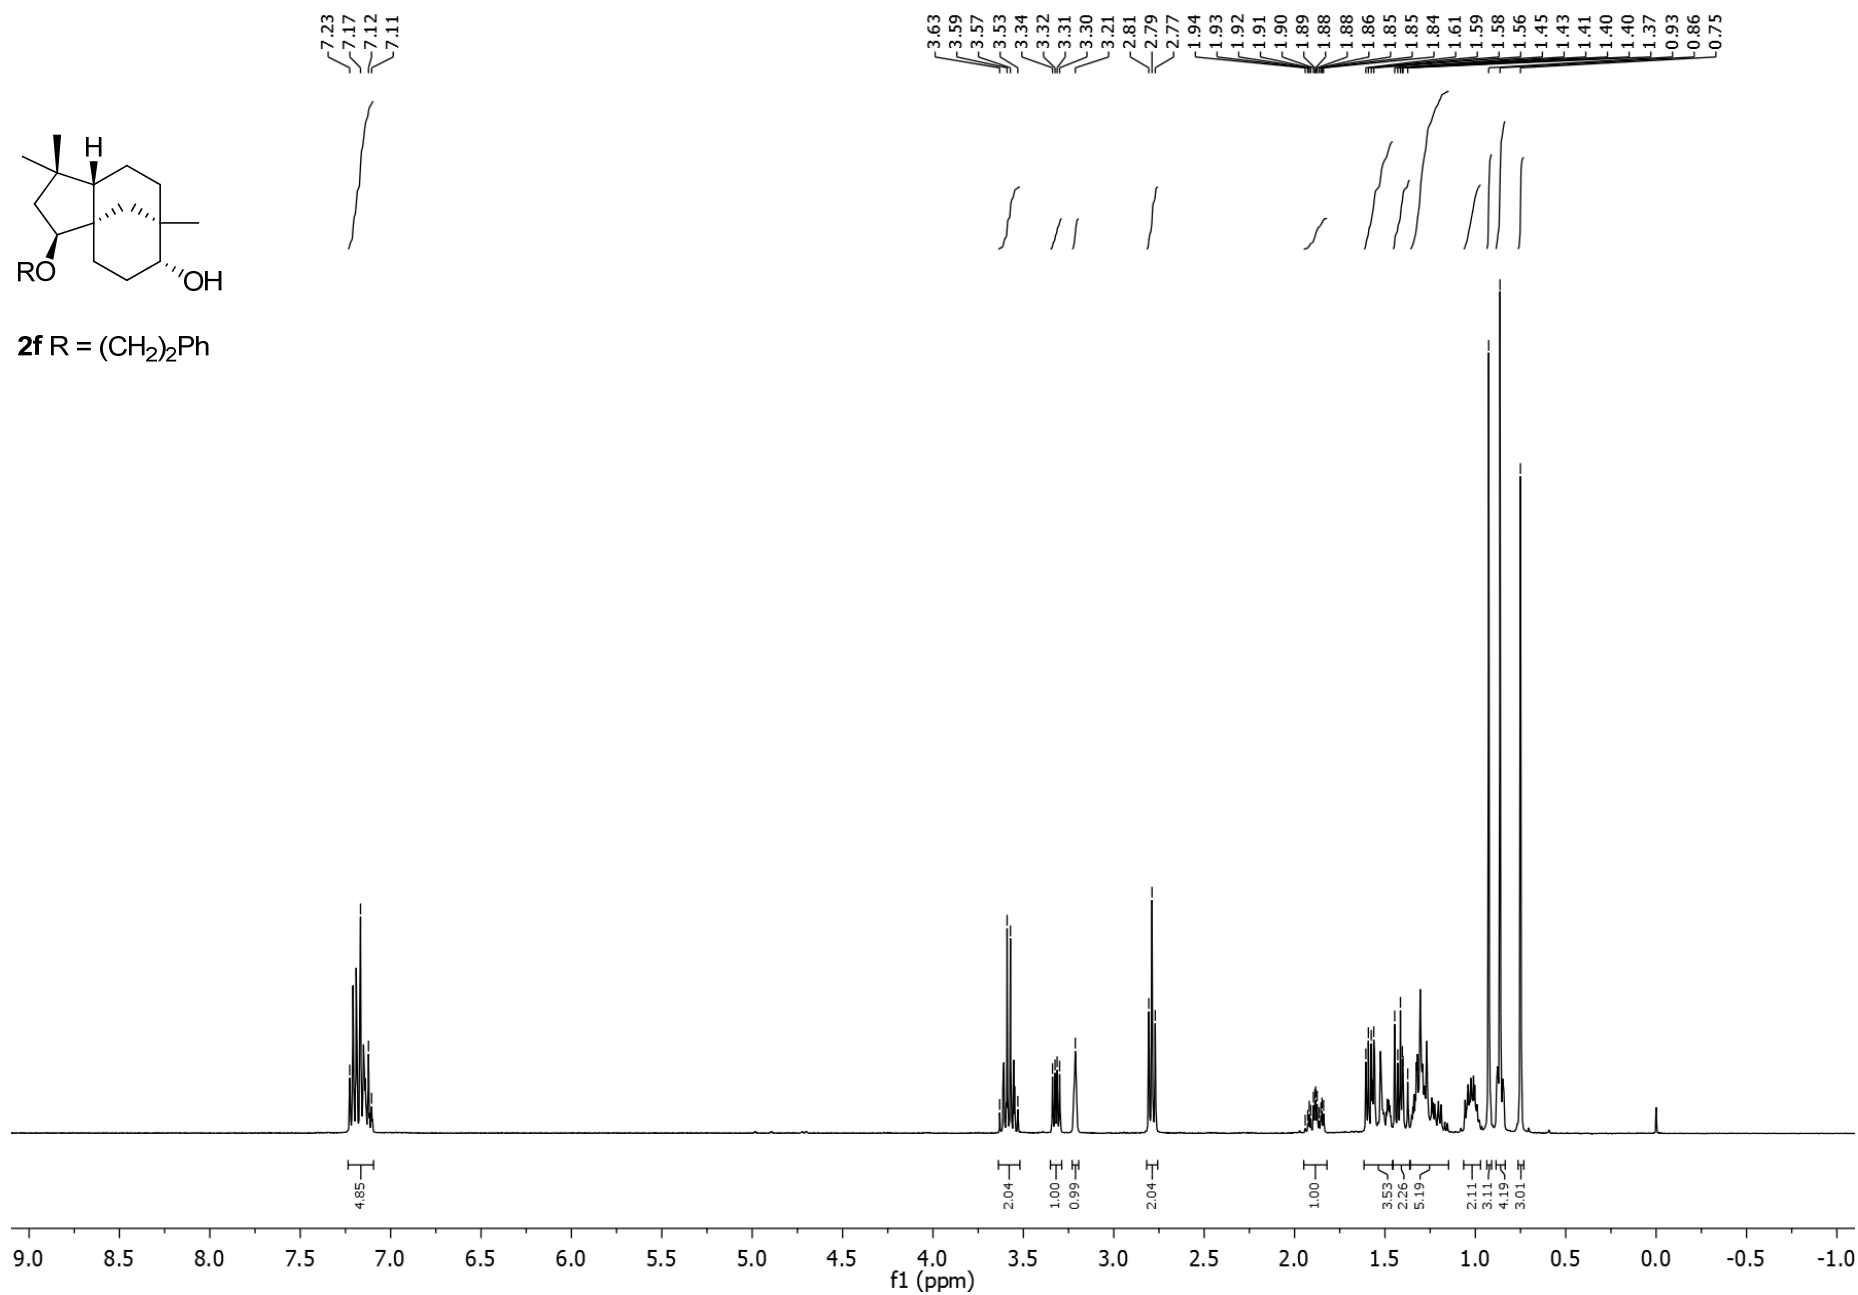

**Figure S5.**  $^1H$  NMR spectrum of compound **2f** in  $CDCl_3$  (400 MHz).

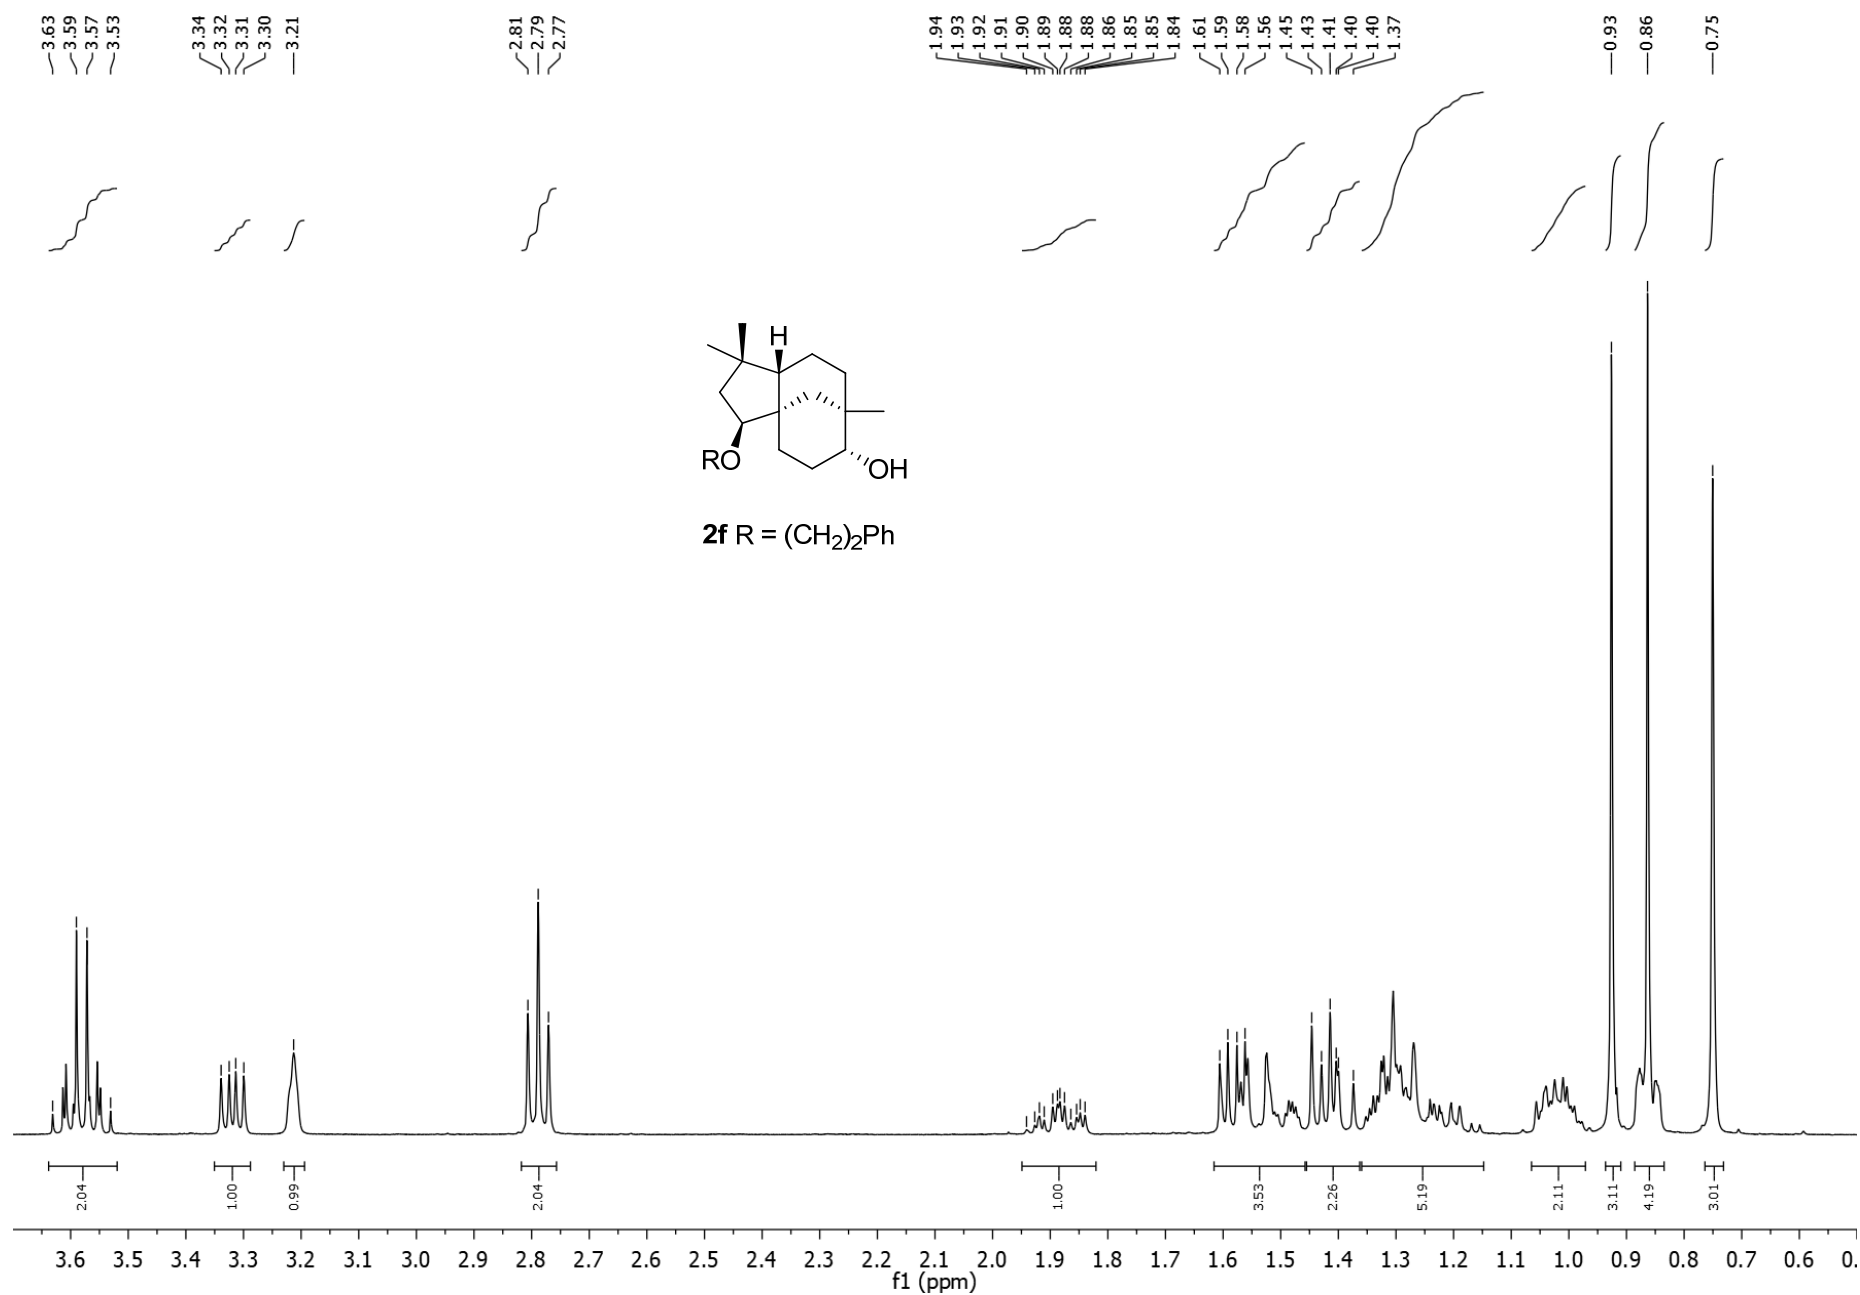

**Figure S5a.** Expansion ( $\delta_H$  3.7-0.5) of  $^1H$  NMR spectrum of compound **2f** in  $CDCl_3$  (400 MHz).



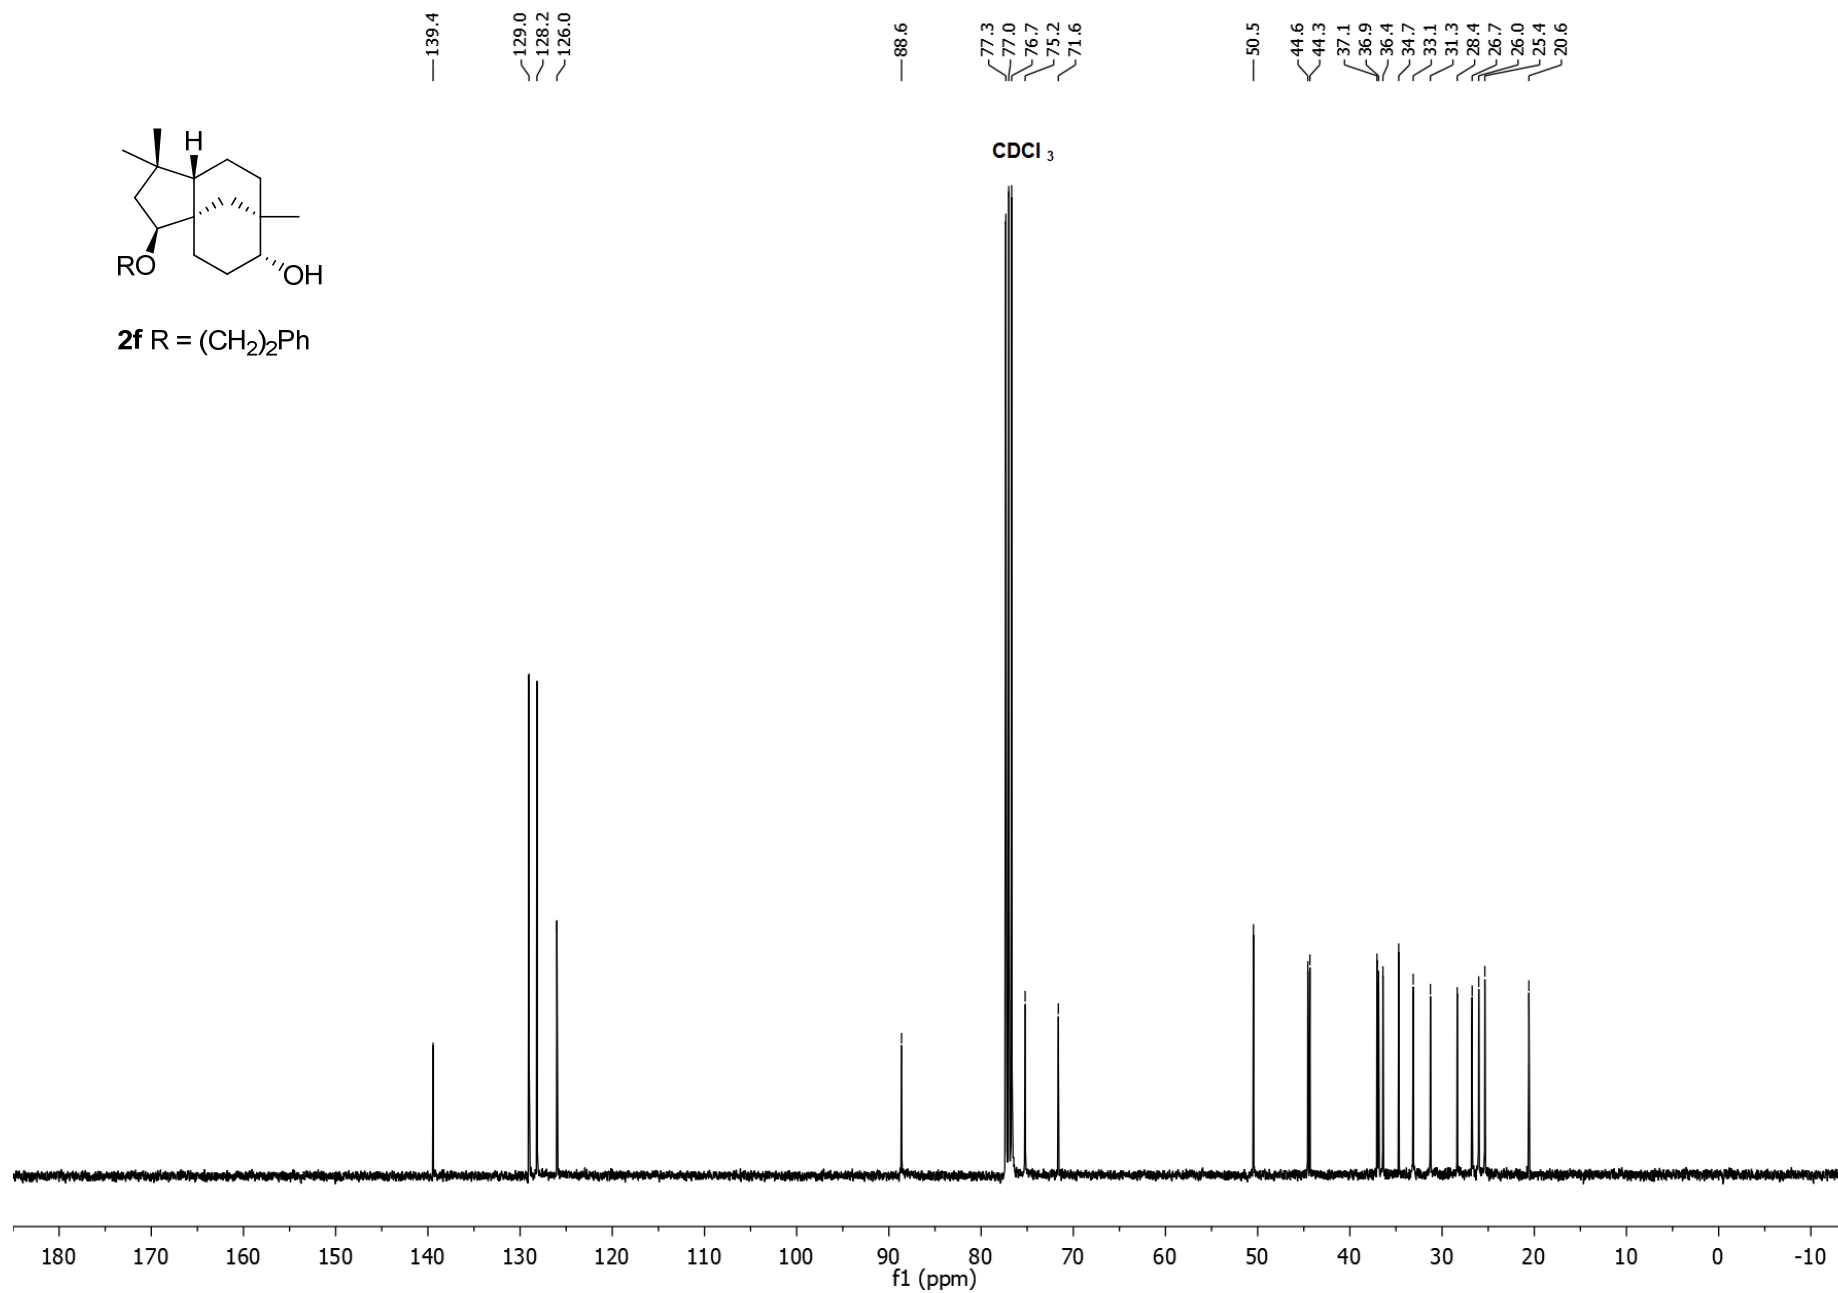

**Figure S6.** <sup>13</sup>C NMR spectrum of compound **2f** in CDCl<sub>3</sub> (100 MHz).

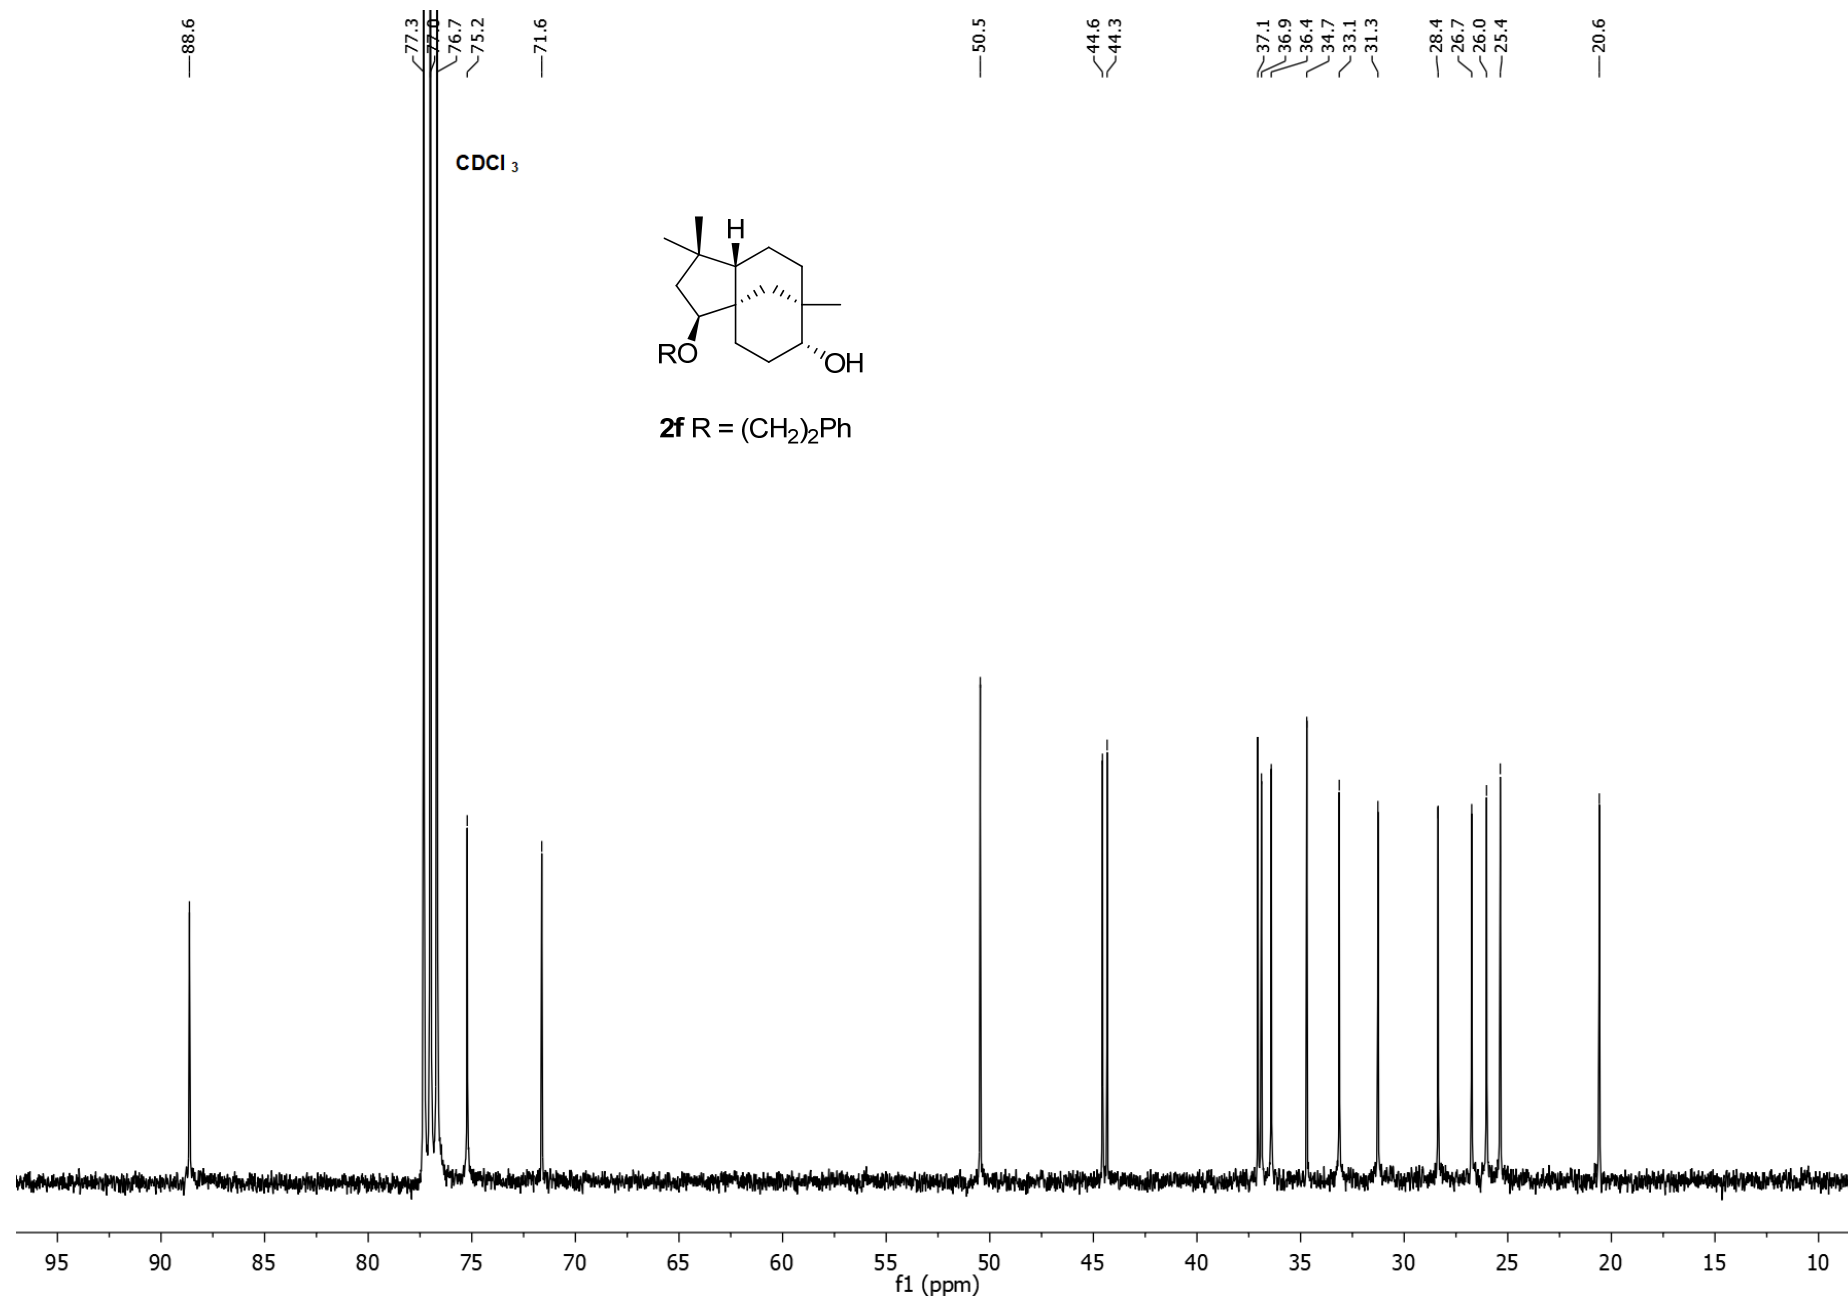

**Figure S6a.** Expansion ( $\delta_c$  95-10) of  $^{13}C$  NMR spectrum of compound **2f** in  $CDCl_3$  (100 MHz).

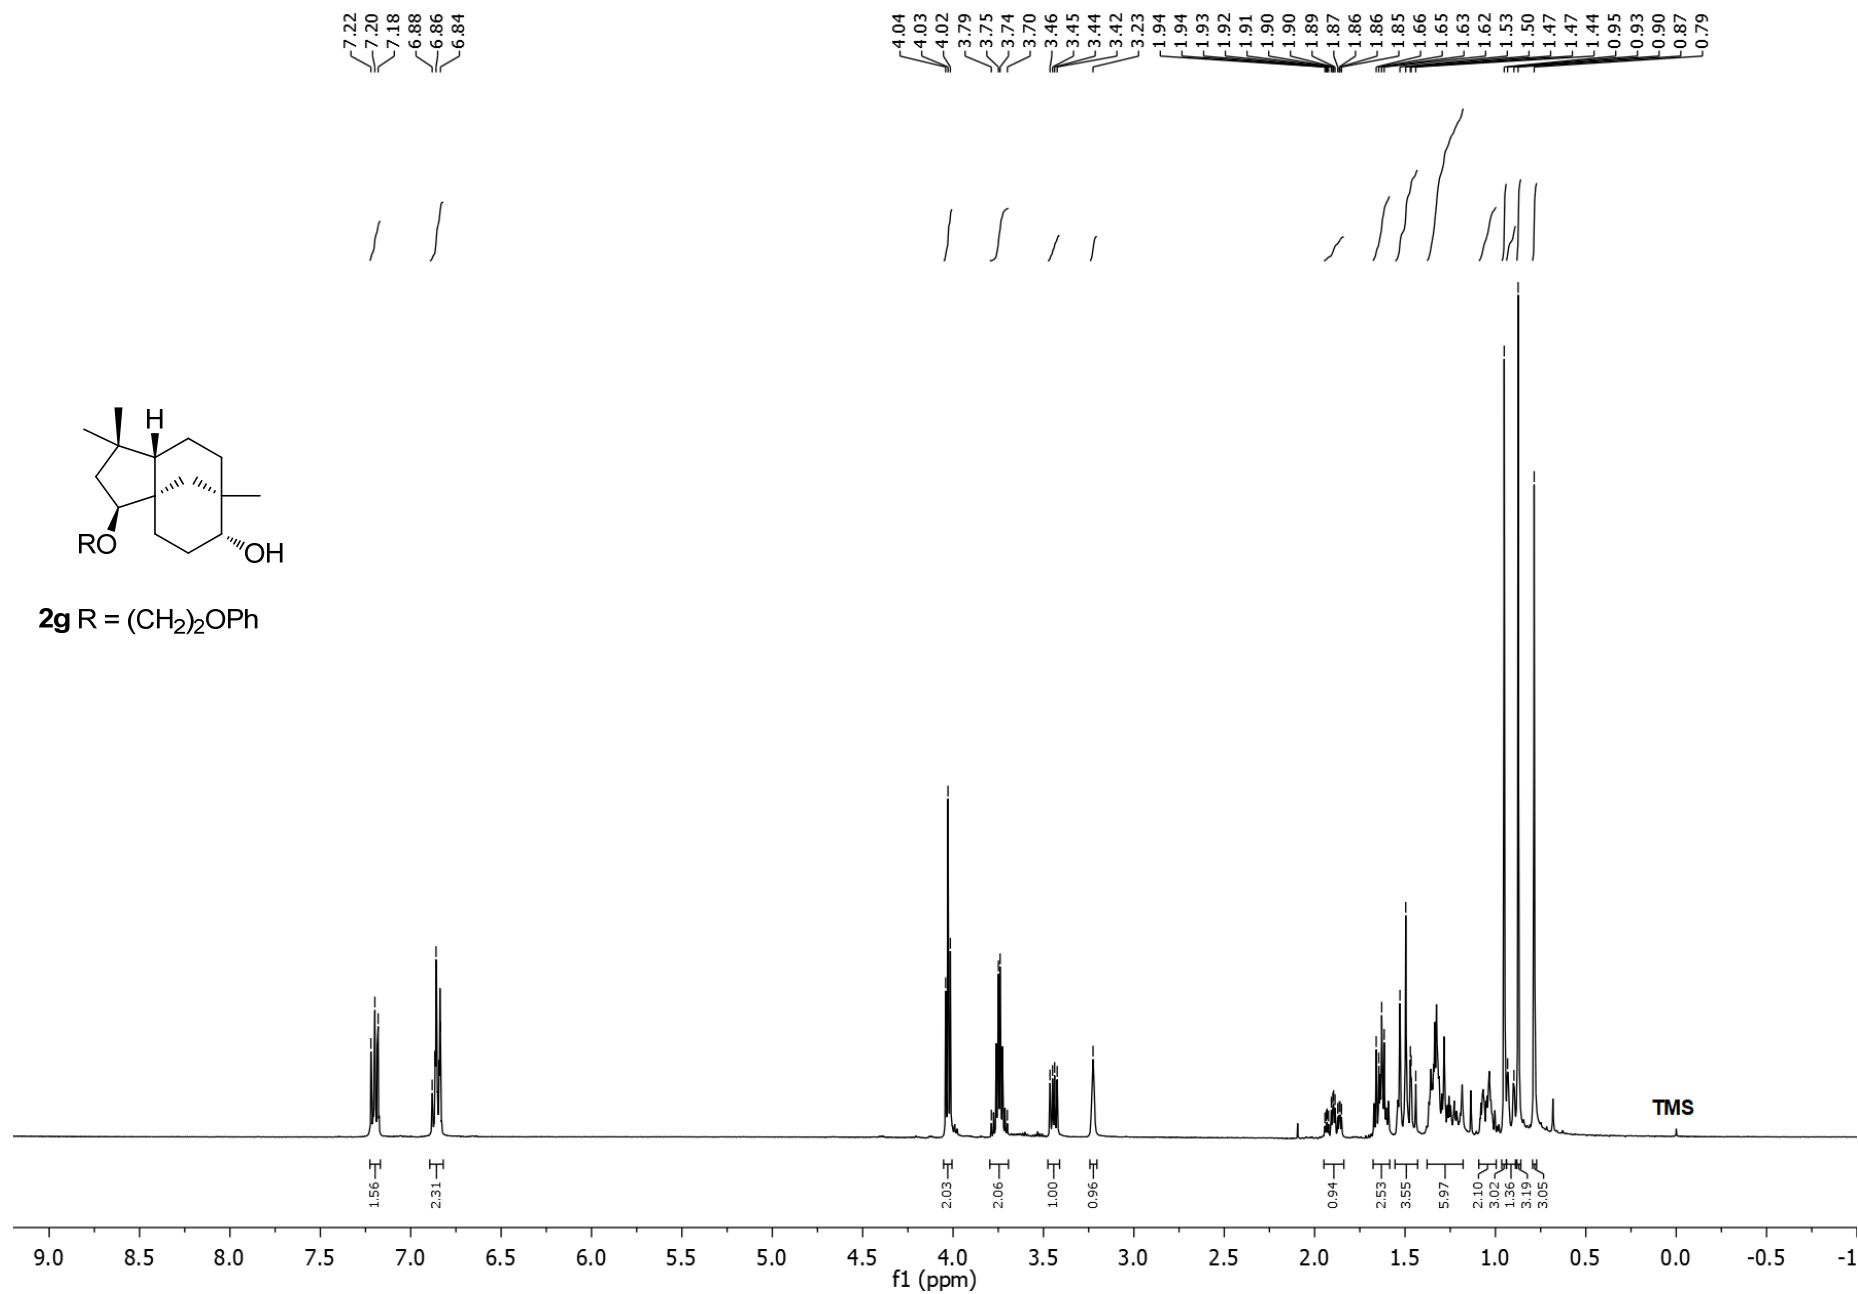

**Figure S7.**  $^1H$  NMR spectrum of compound **2g** in  $CDCl_3$  (400 MHz).

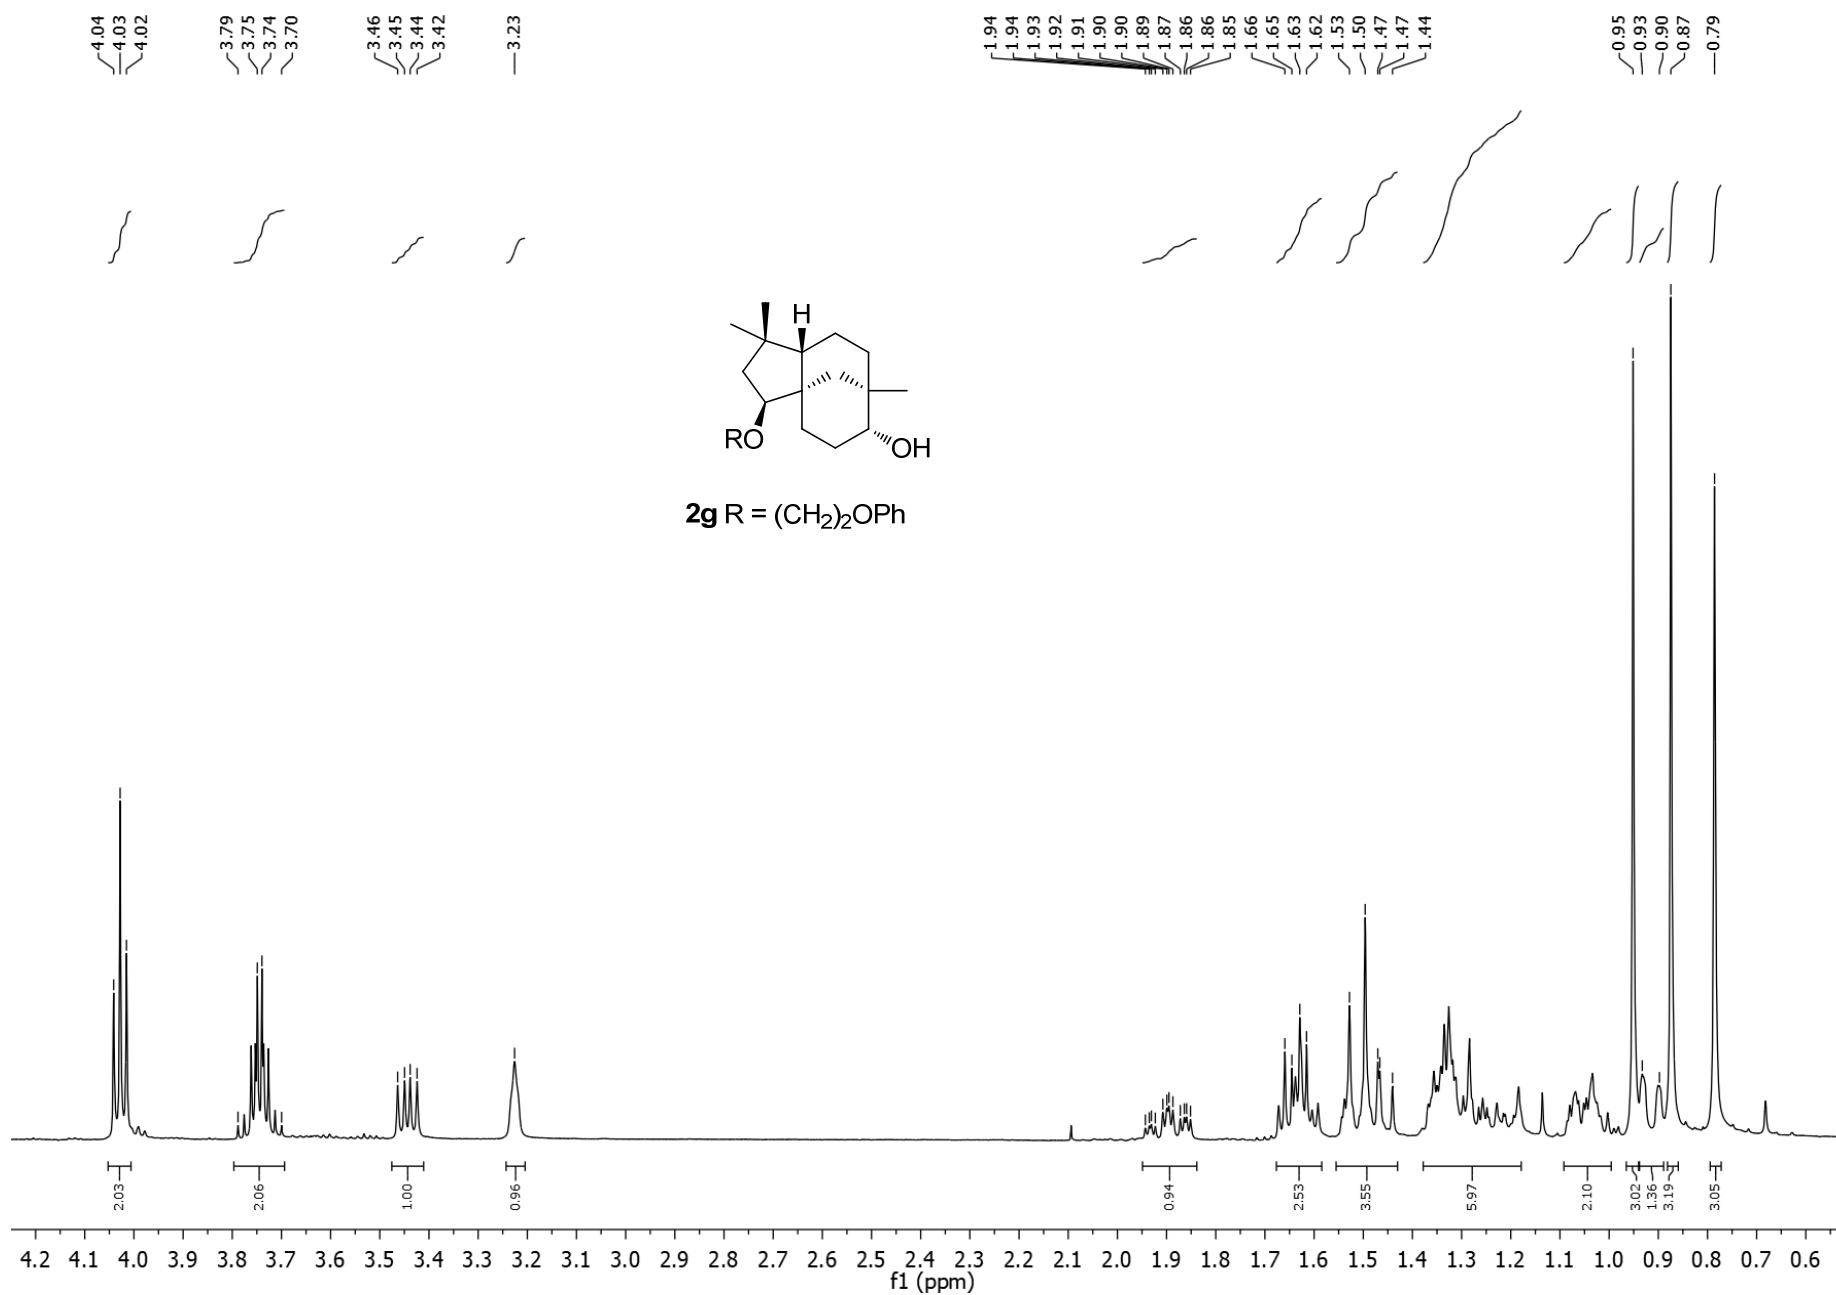

**Figure S7a.** Expansion ( $\delta_H$  4.2-0.5) of  $^1H$  NMR spectrum of compound **2g** in  $CDCl_3$  (400 MHz).

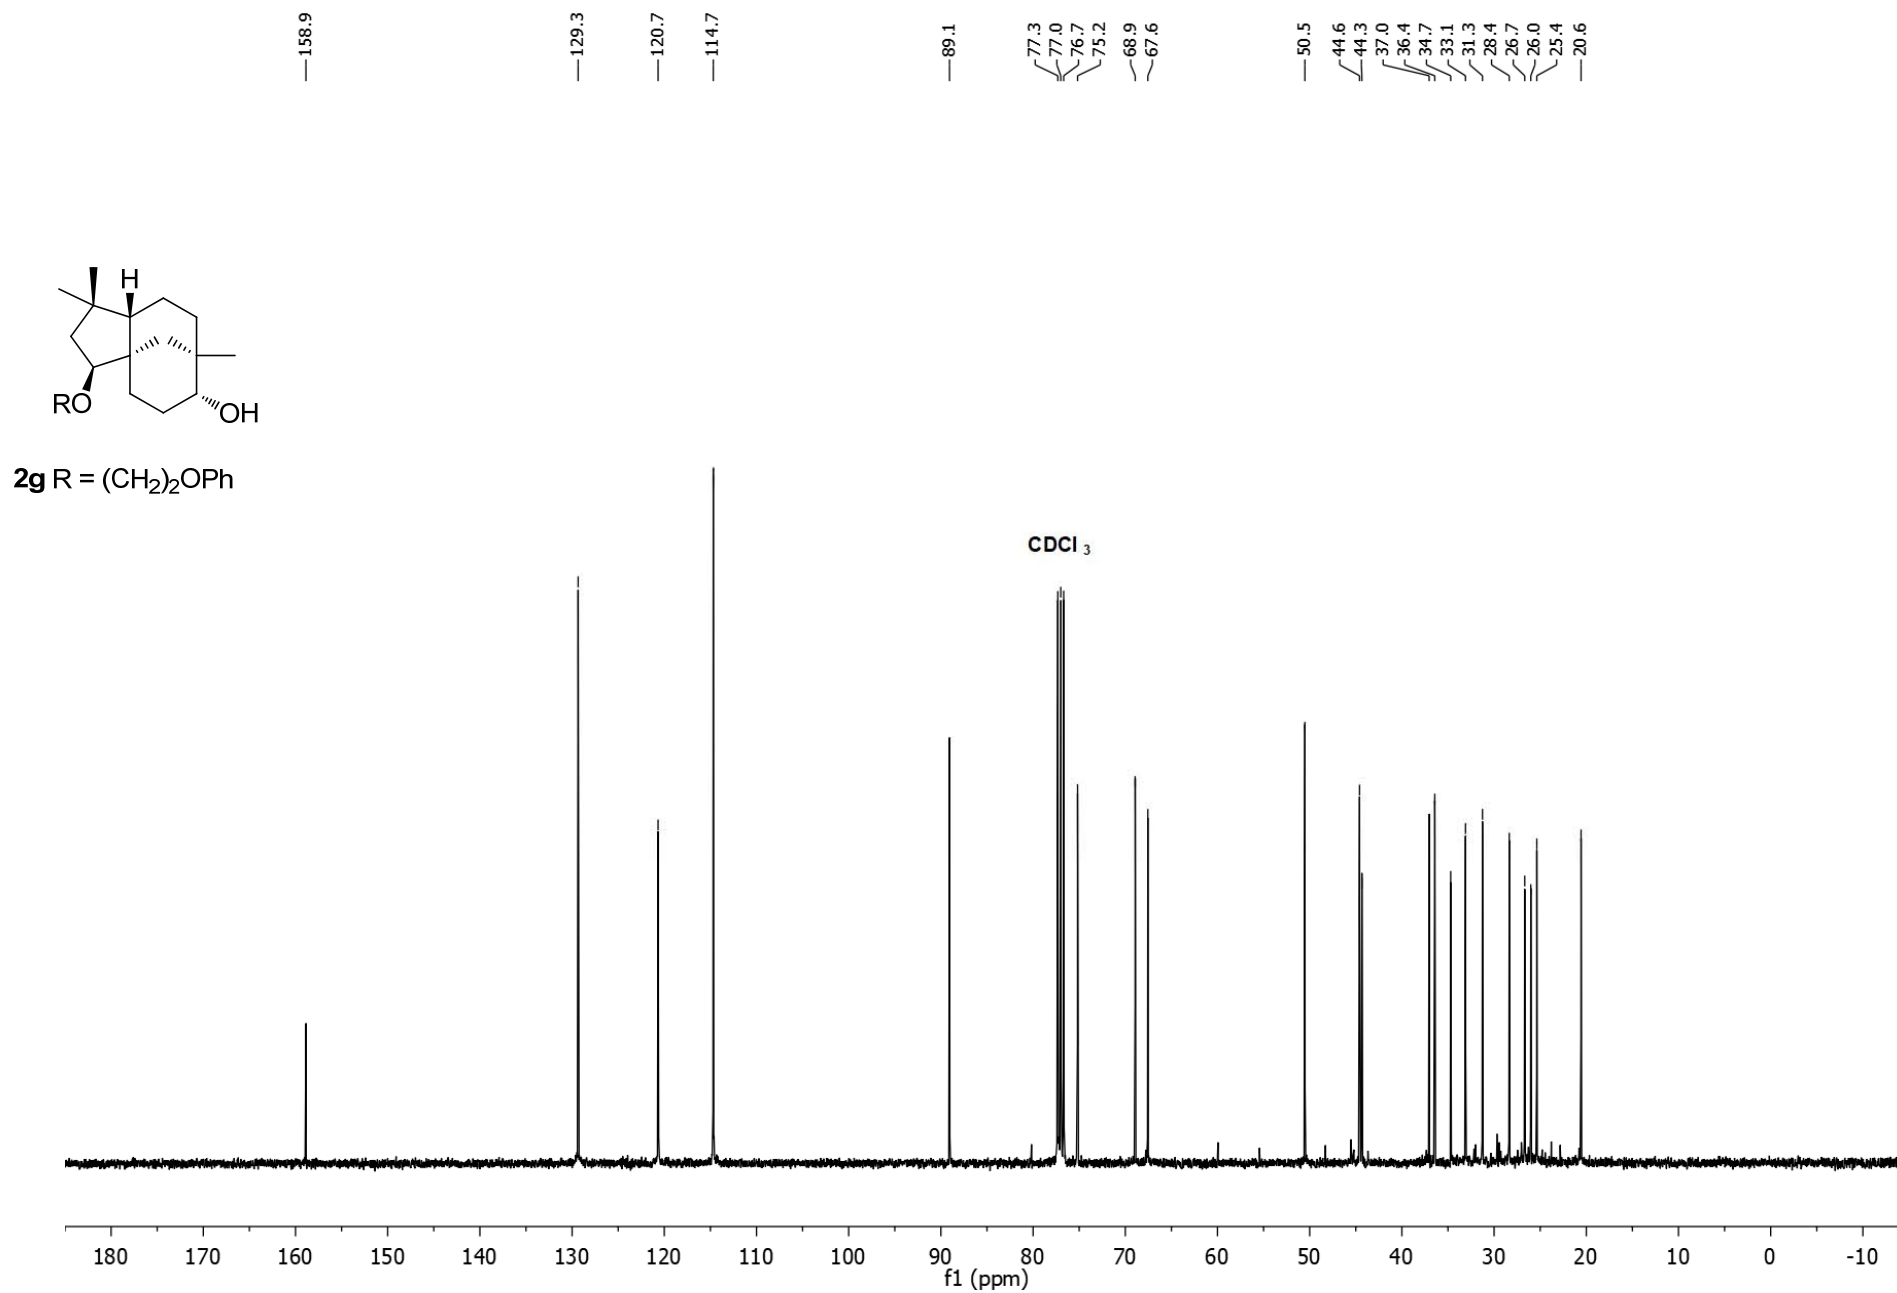

**Figure S8.** <sup>13</sup>C NMR spectrum of compound **2g** in CDCl<sub>3</sub> (100 MHz).

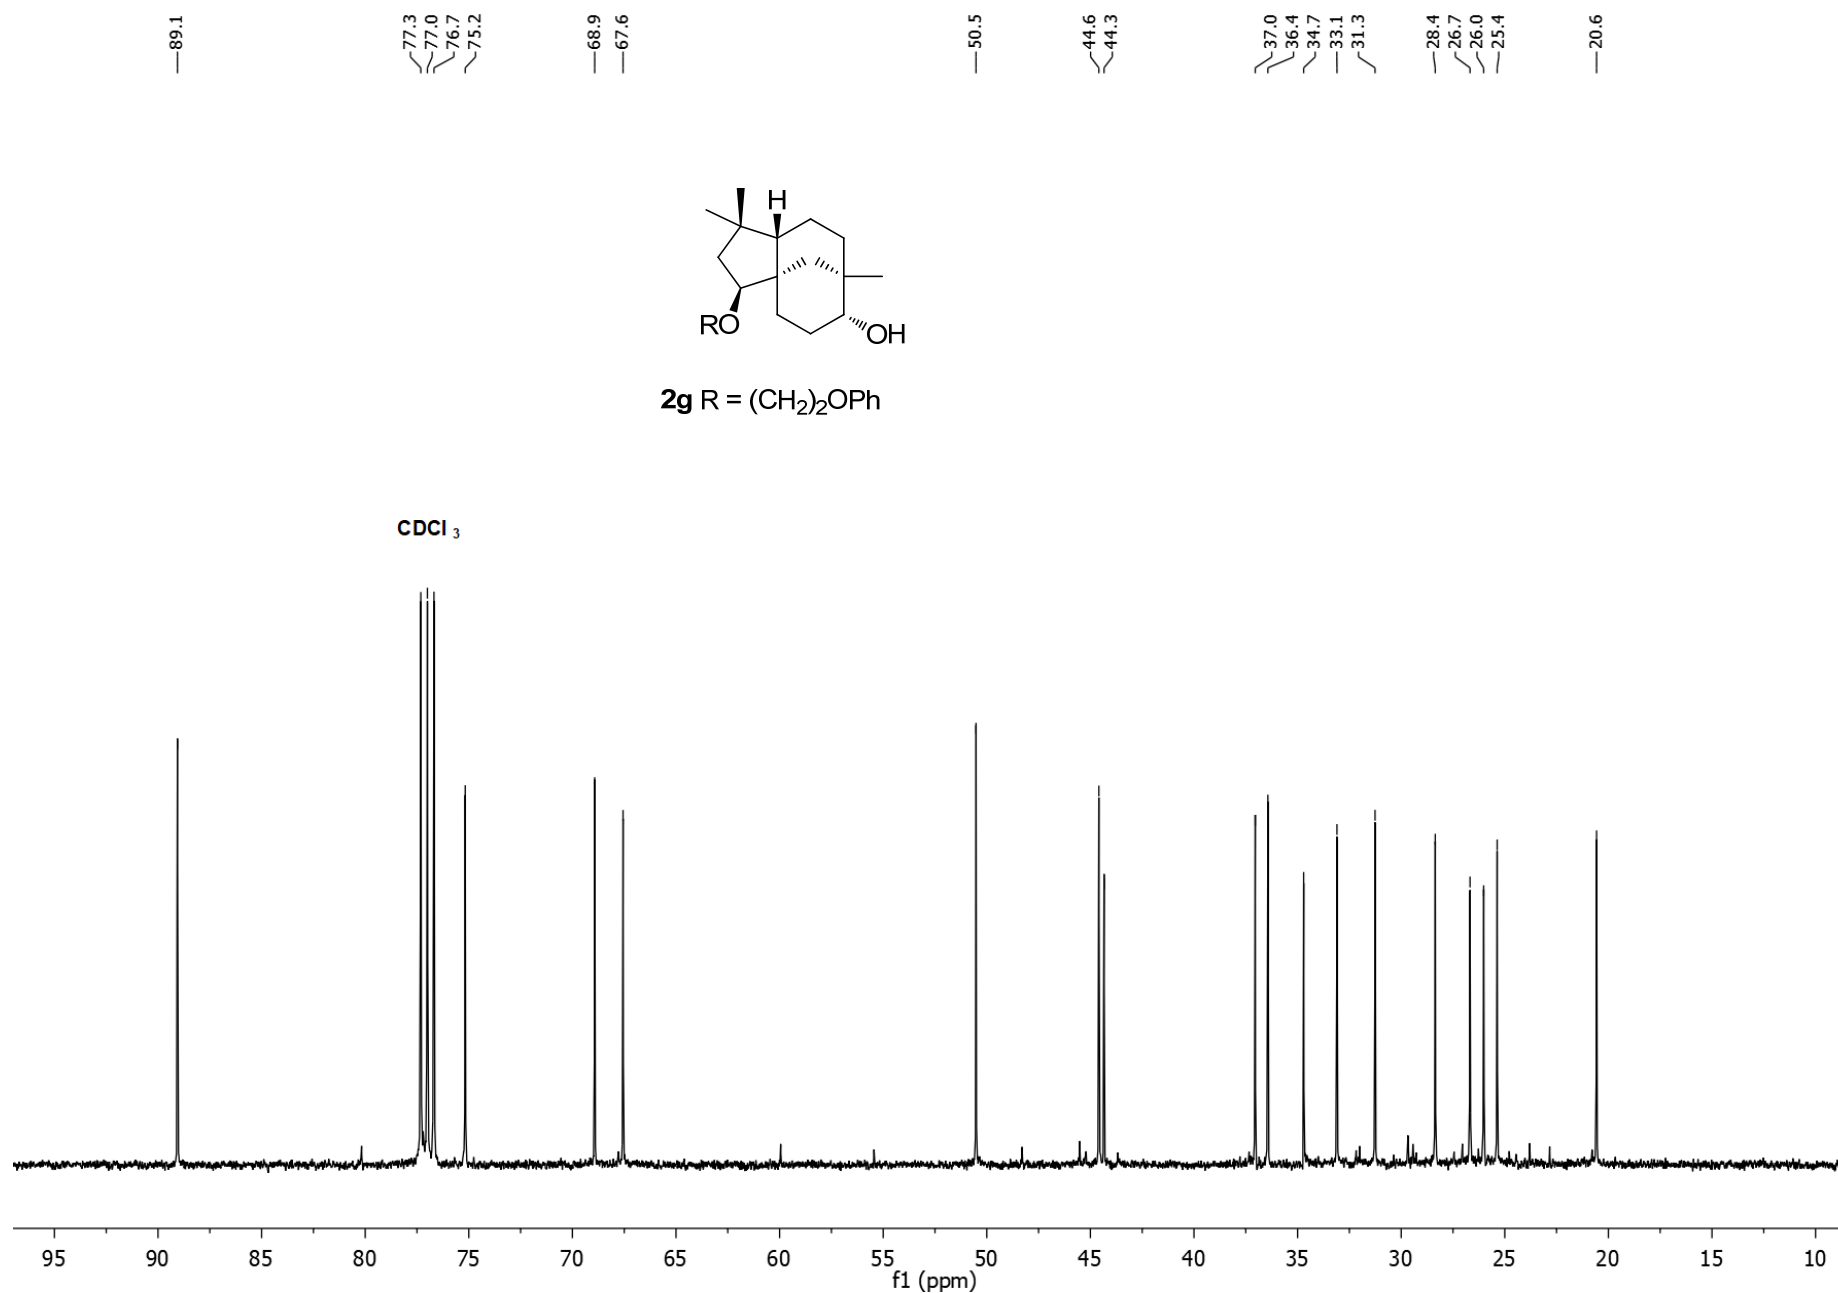

**Figure S8a.** Expansion ( $\delta_c$  95-10) of <sup>13</sup>C NMR spectrum of compound **2g** in CDCl<sub>3</sub> (100 MHz).

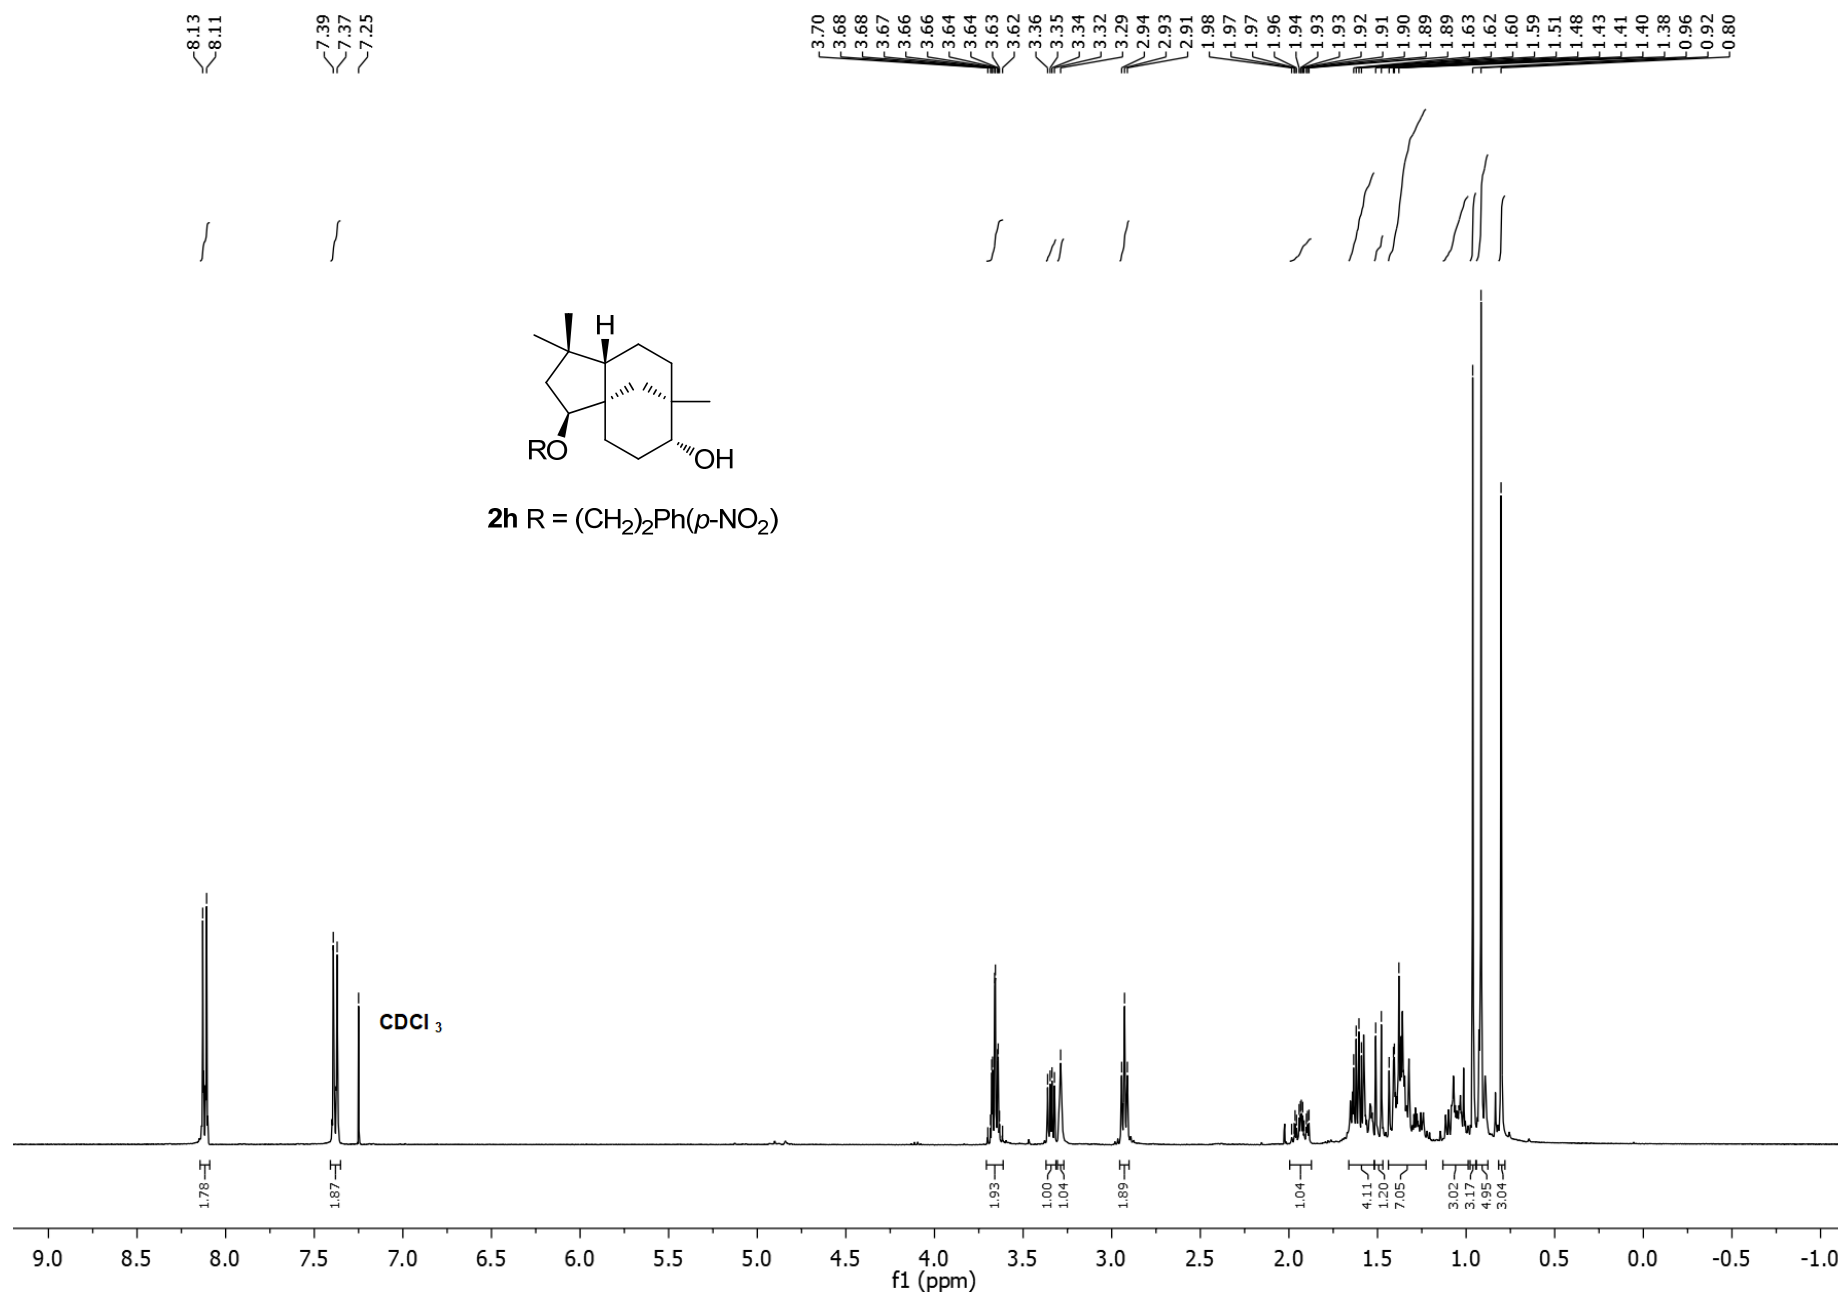

**Figure S9.** <sup>1</sup>H NMR spectrum of compound **2h** in CDCl<sub>3</sub> (400 MHz).

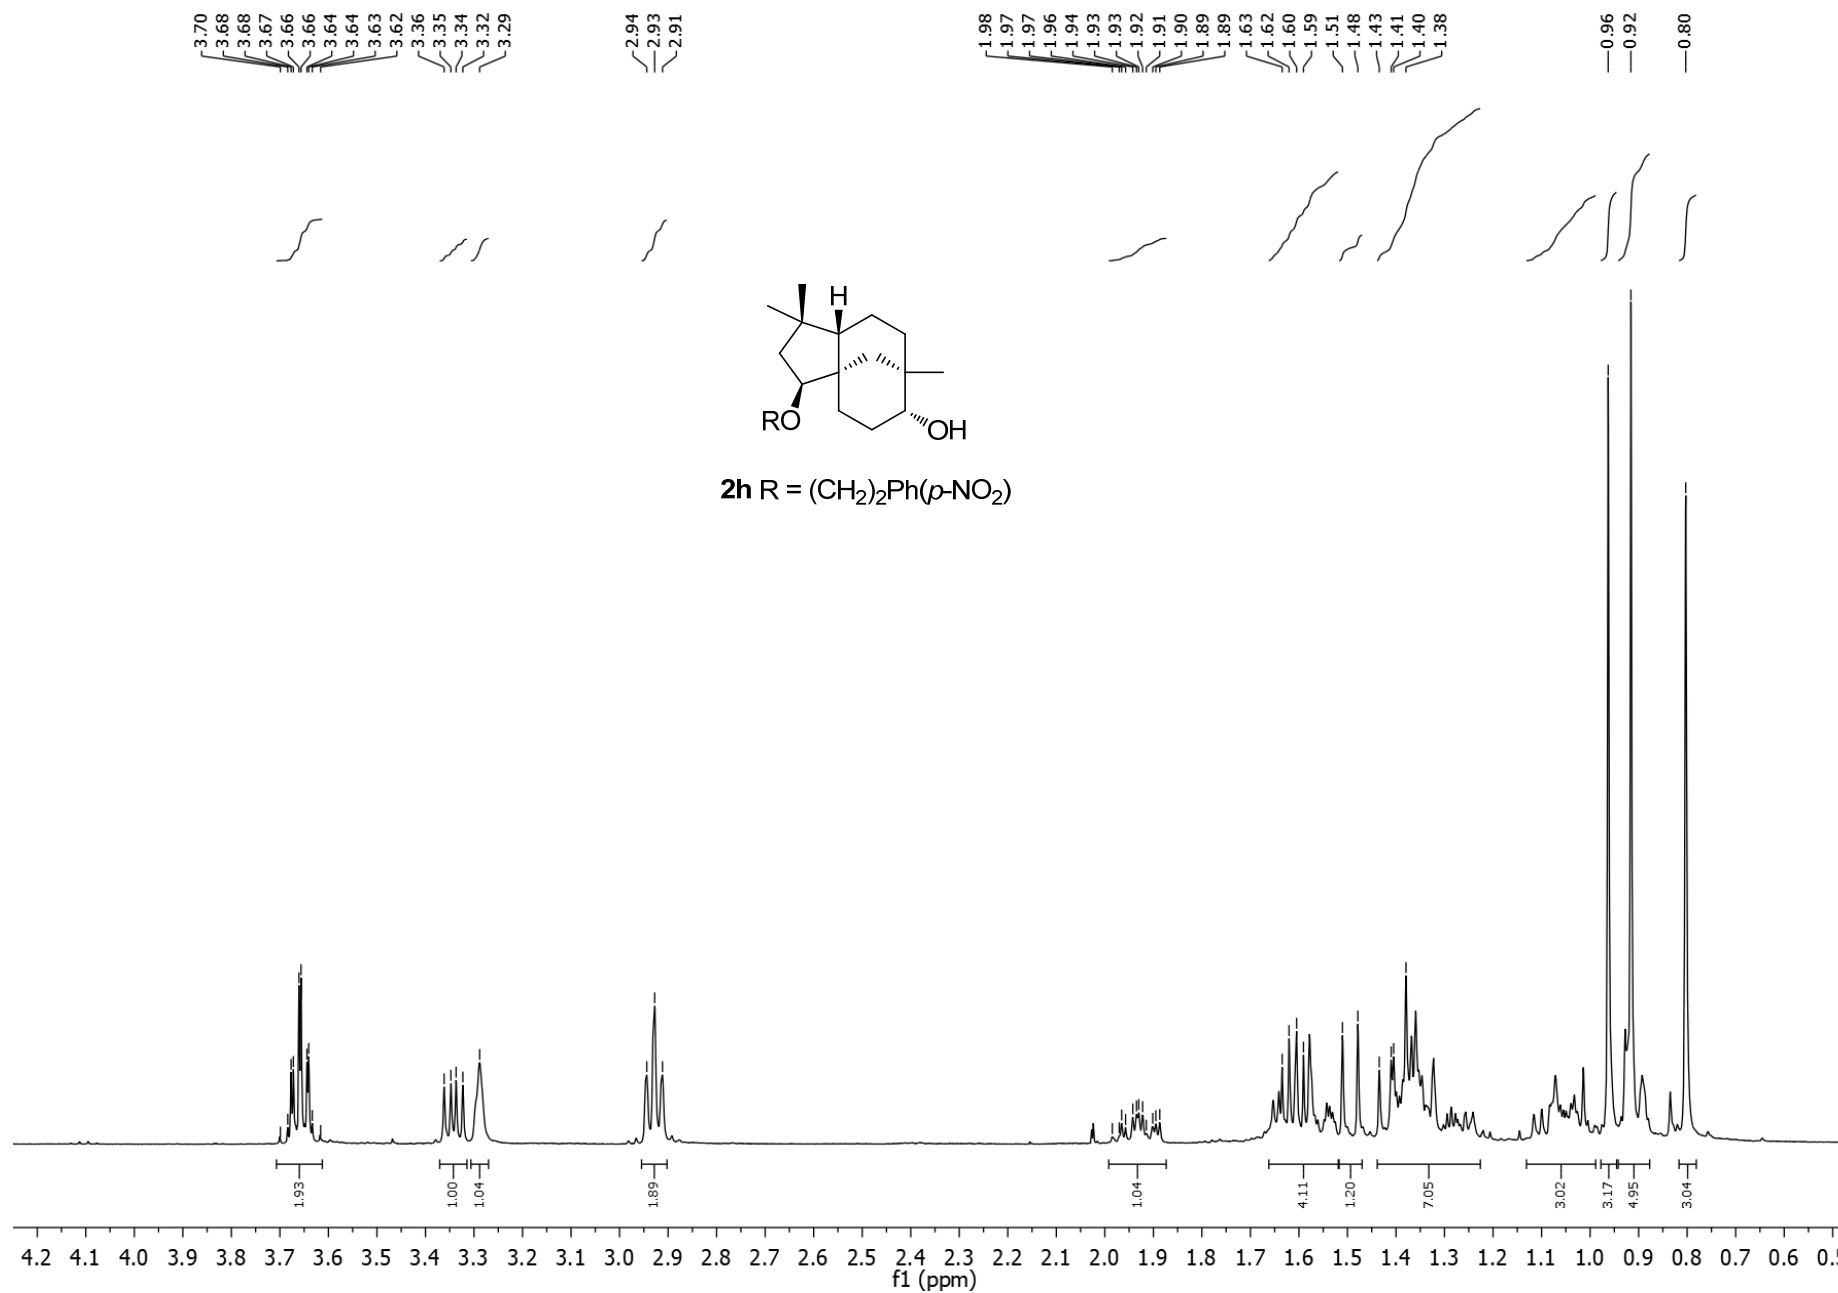

**Figure S9a.** Expansion ( $\delta_{\text{H}}$  4.2-0.5) of  $^1\text{H}$  NMR spectrum of compound **2h** in  $\text{CDCl}_3$  (400 MHz).



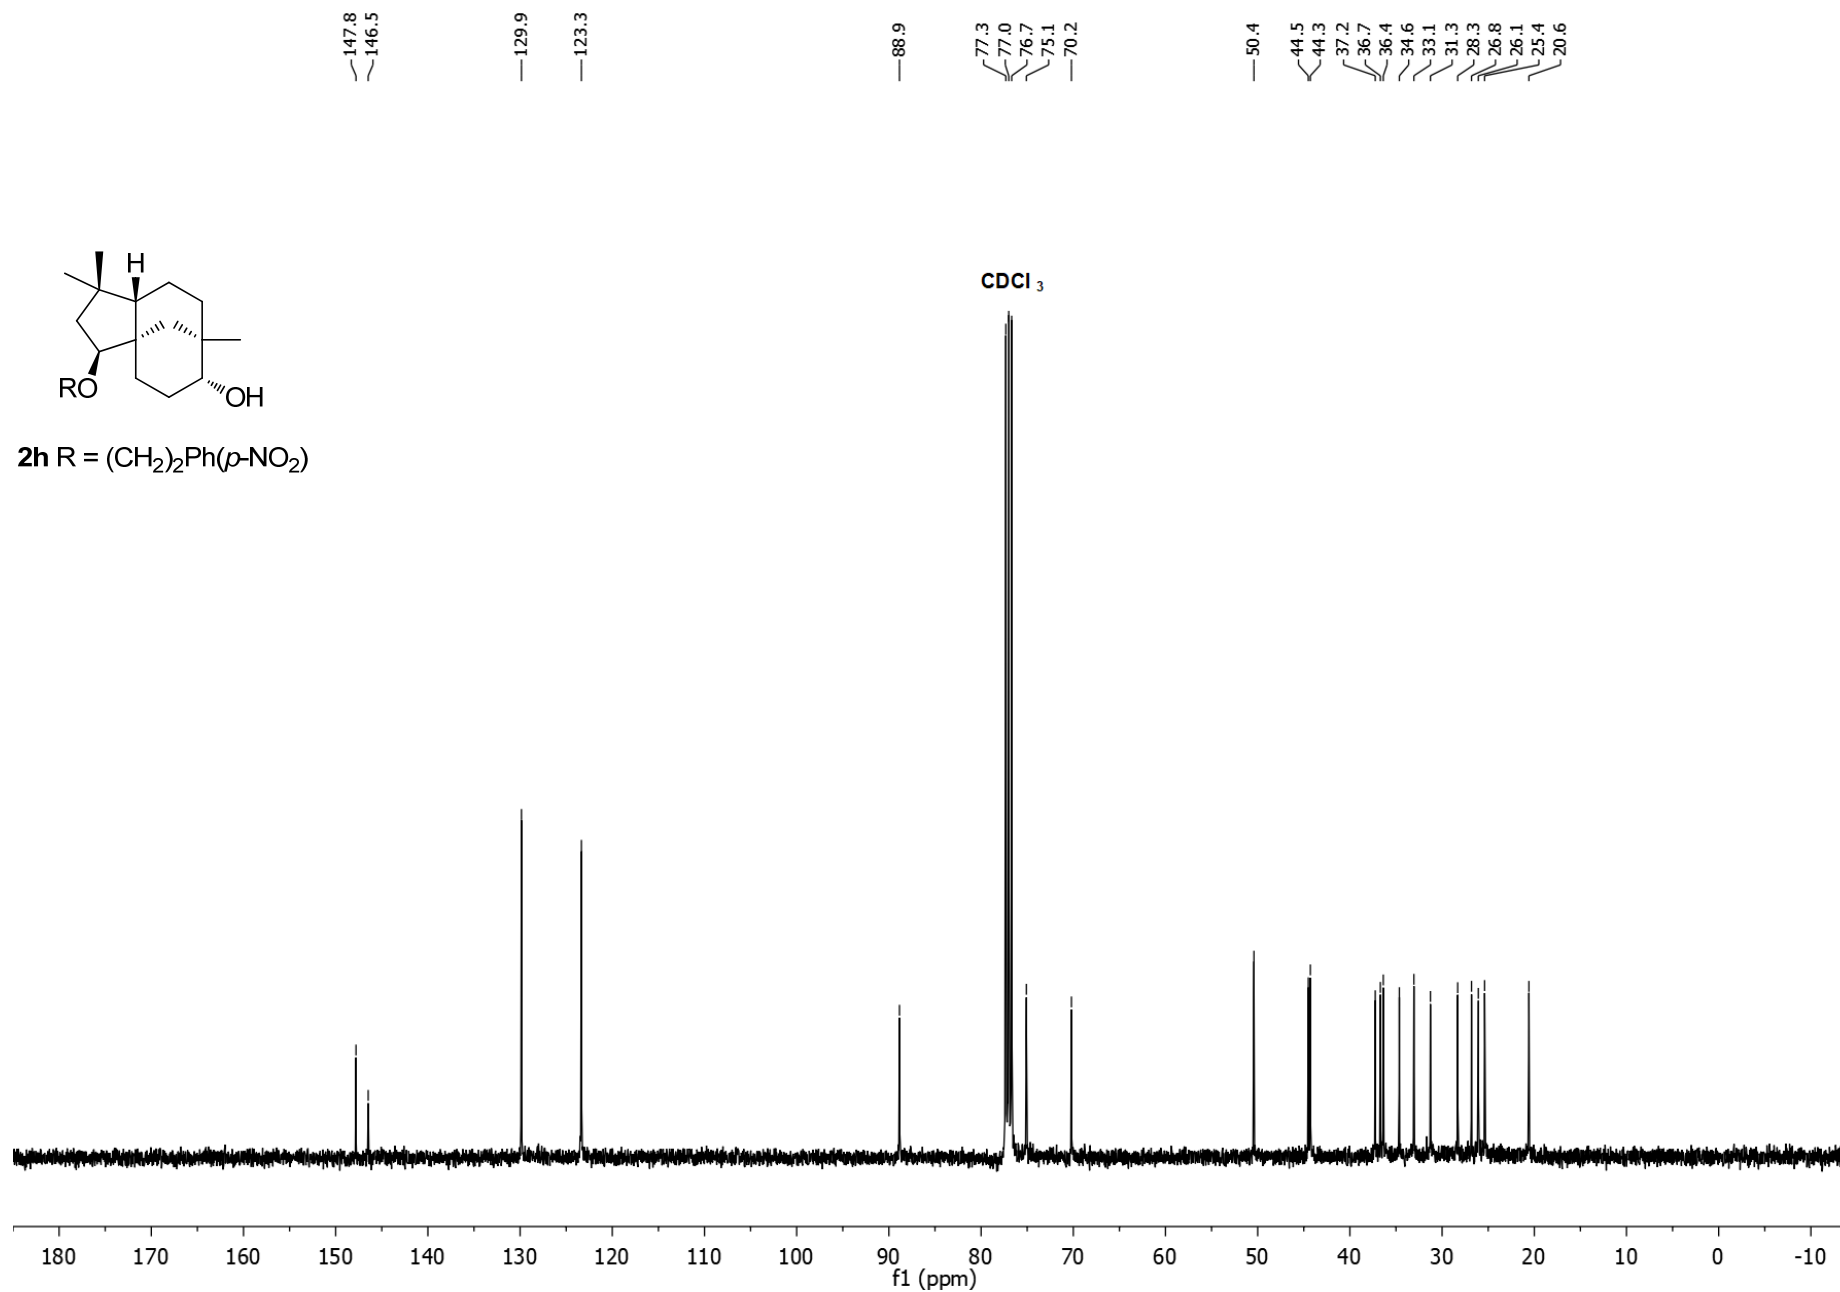

**Figure S10.** <sup>13</sup>C NMR spectrum of compound **2h** in CDCl<sub>3</sub> (100 MHz).

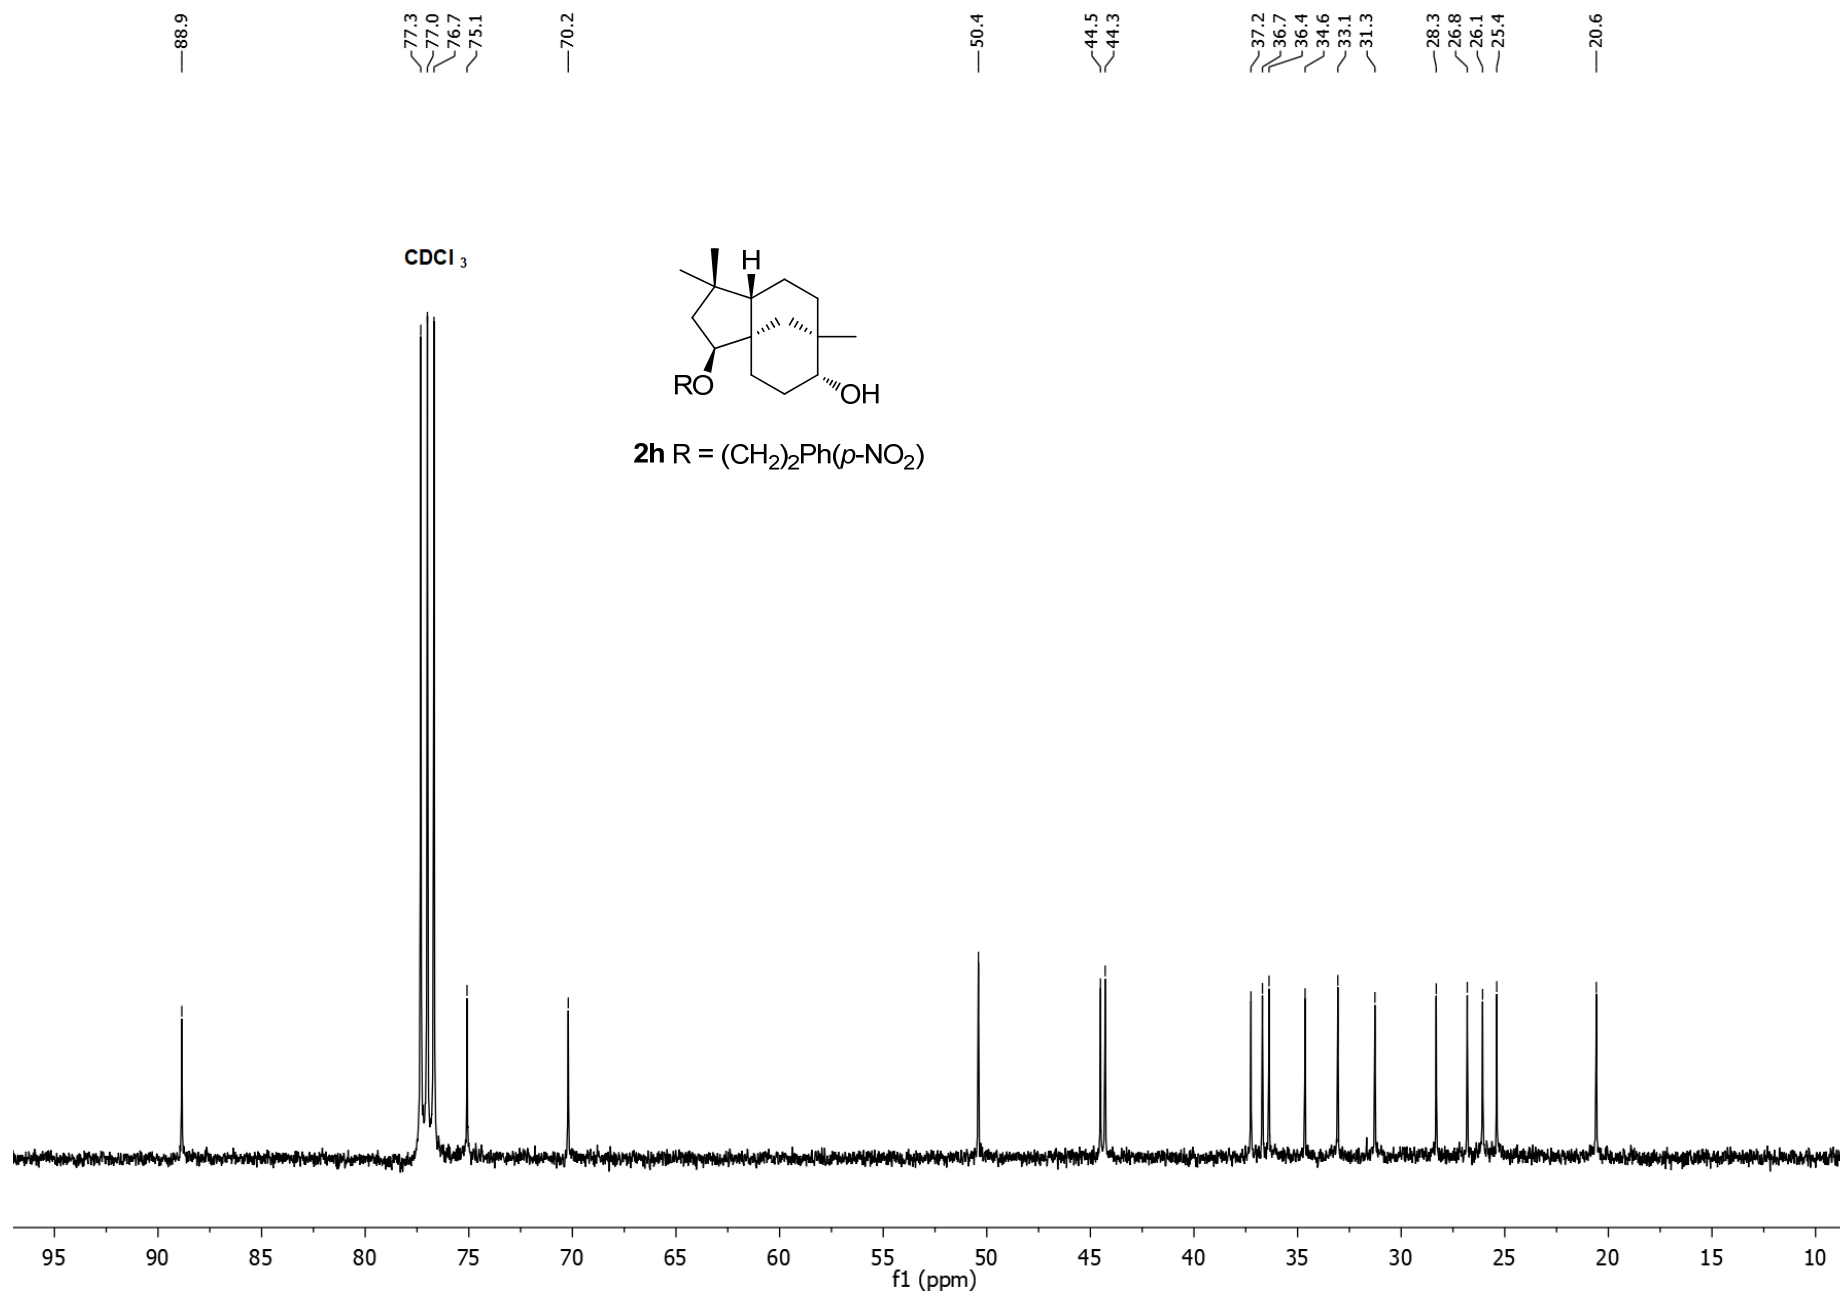

**Figure S10a.** Expansion ( $\delta_C$  95-10) of  $^{13}C$  NMR spectrum of compound **2h** in  $CDCl_3$  (100 MHz).

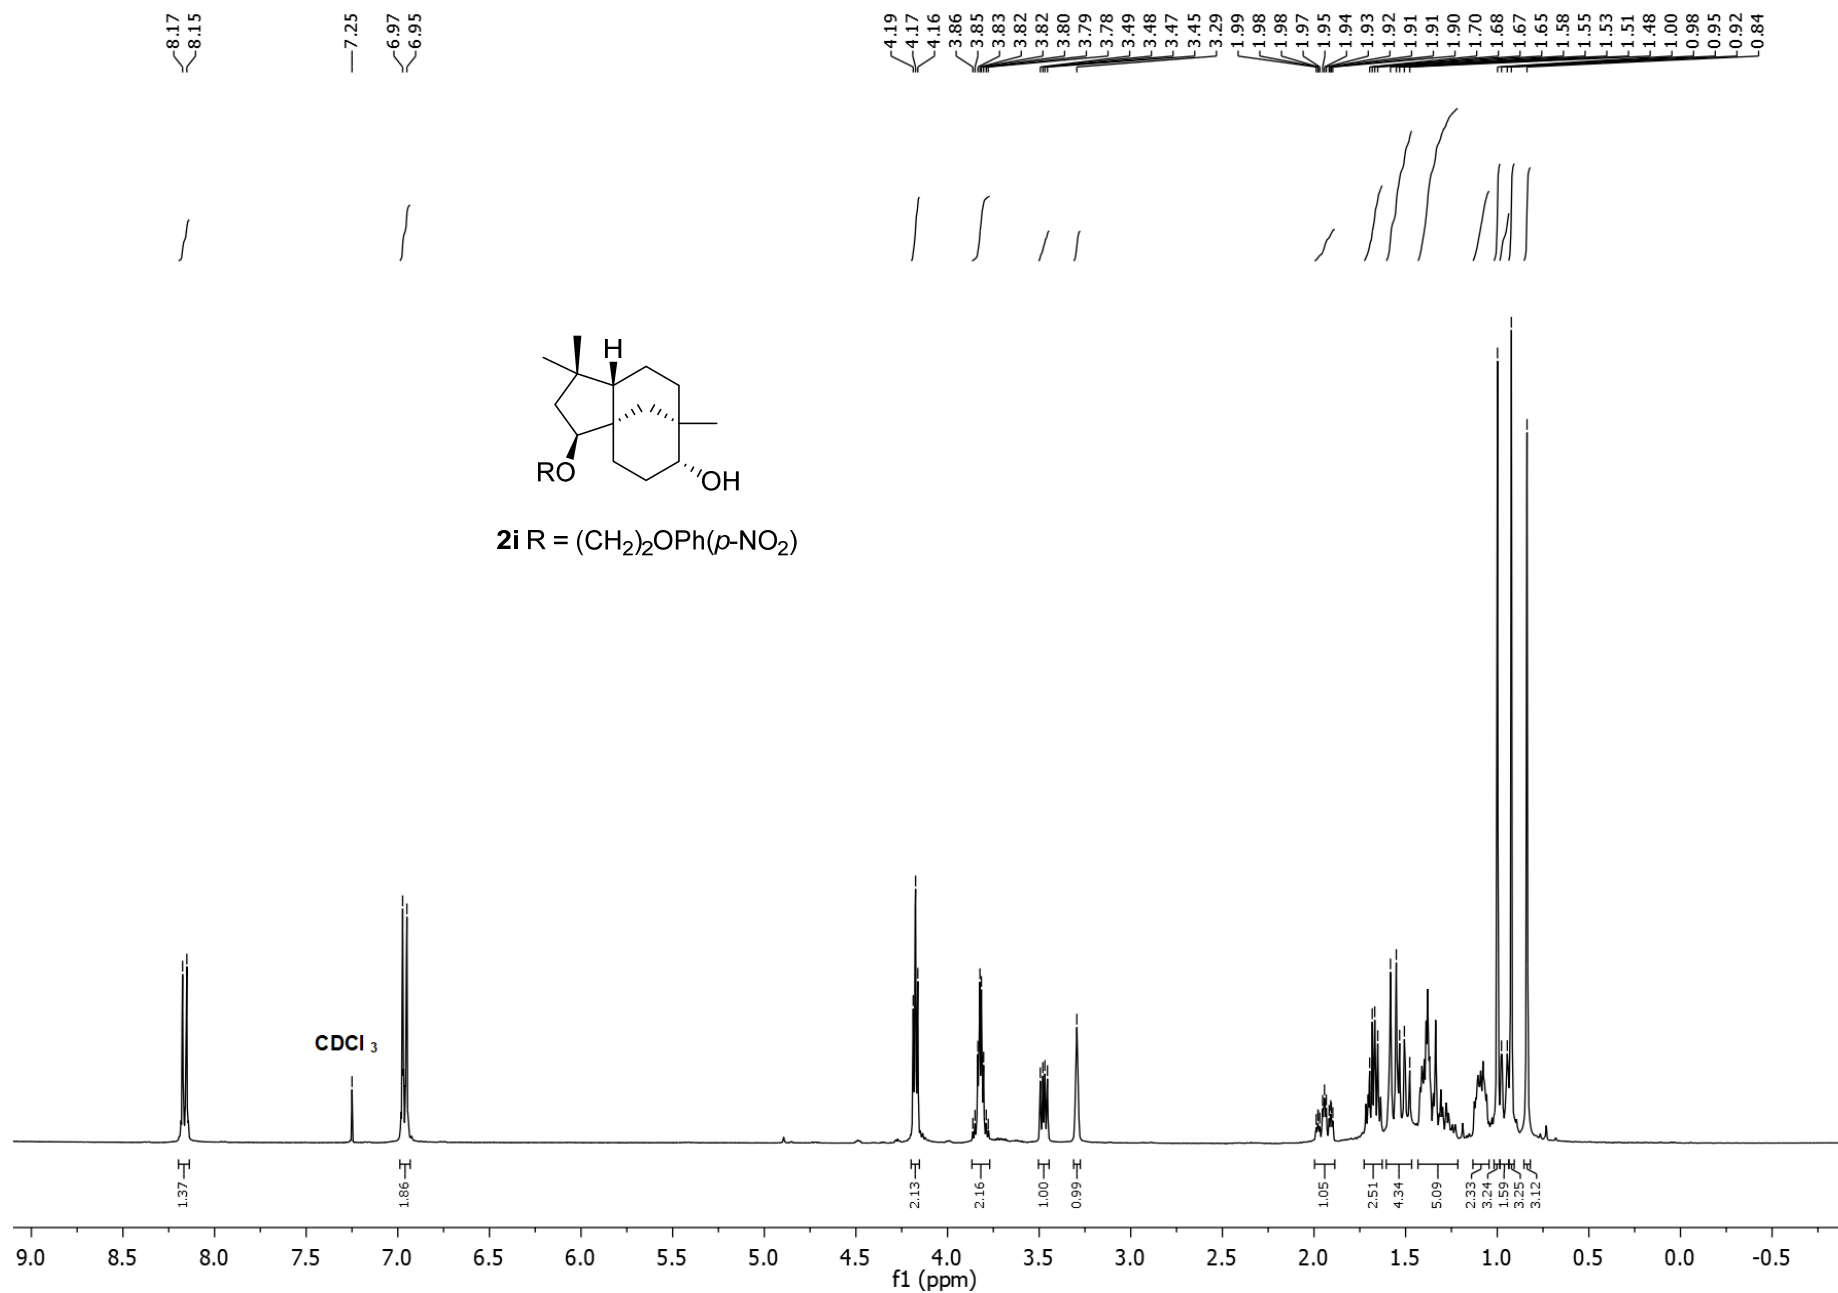

**Figure S11.**  $^1H$  NMR spectrum of compound **2i** in  $CDCl_3$  (400 MHz).

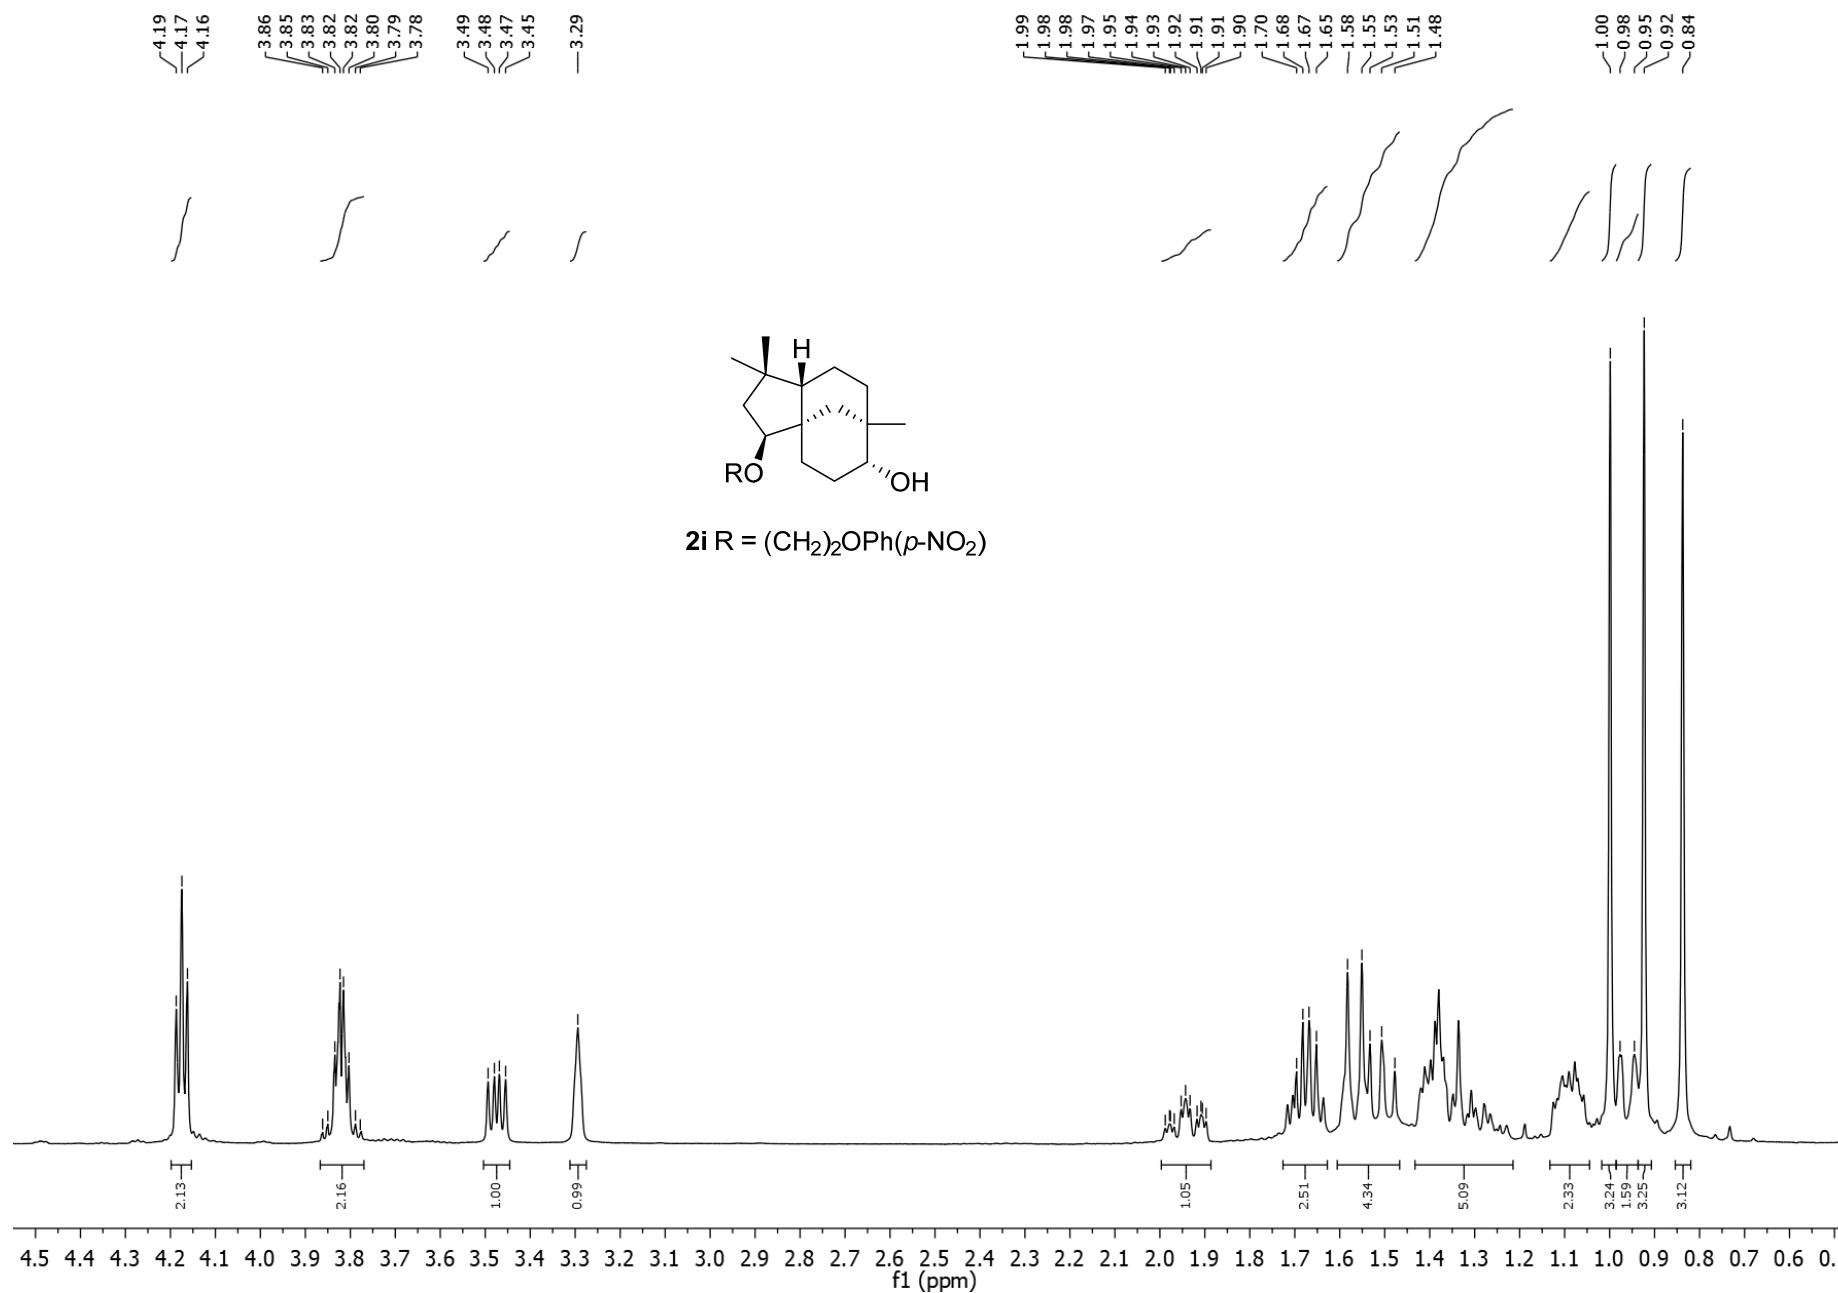

**Figure S11a.** Expansion ( $\delta_H$  4.5-0.5) of  $^1H$  NMR spectrum of compound **2i** in  $CDCl_3$  (400 MHz).

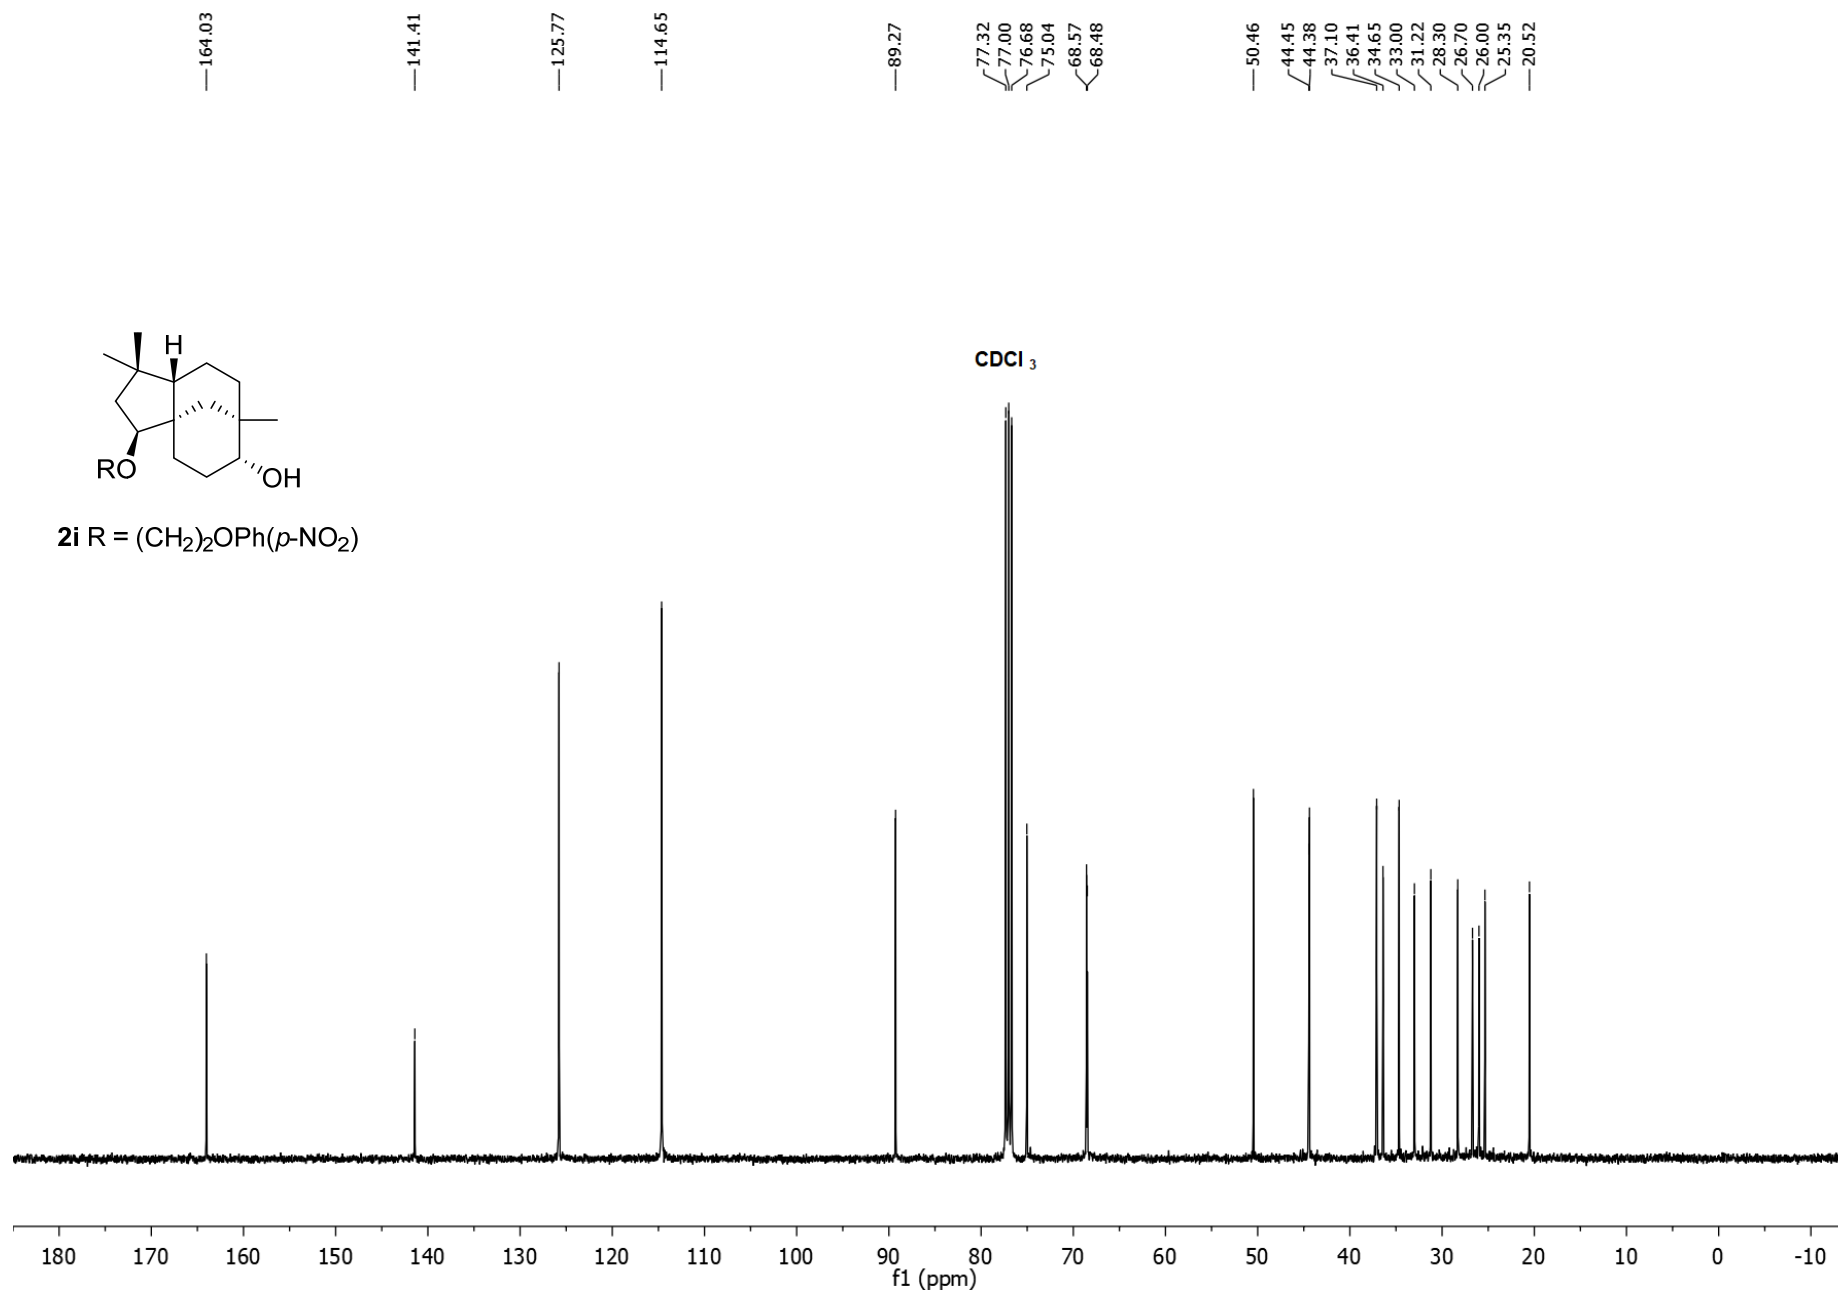

**Figure S12.**  $^{13}C$  NMR spectrum of compound **2i** in  $CDCl_3$  (100 MHz).

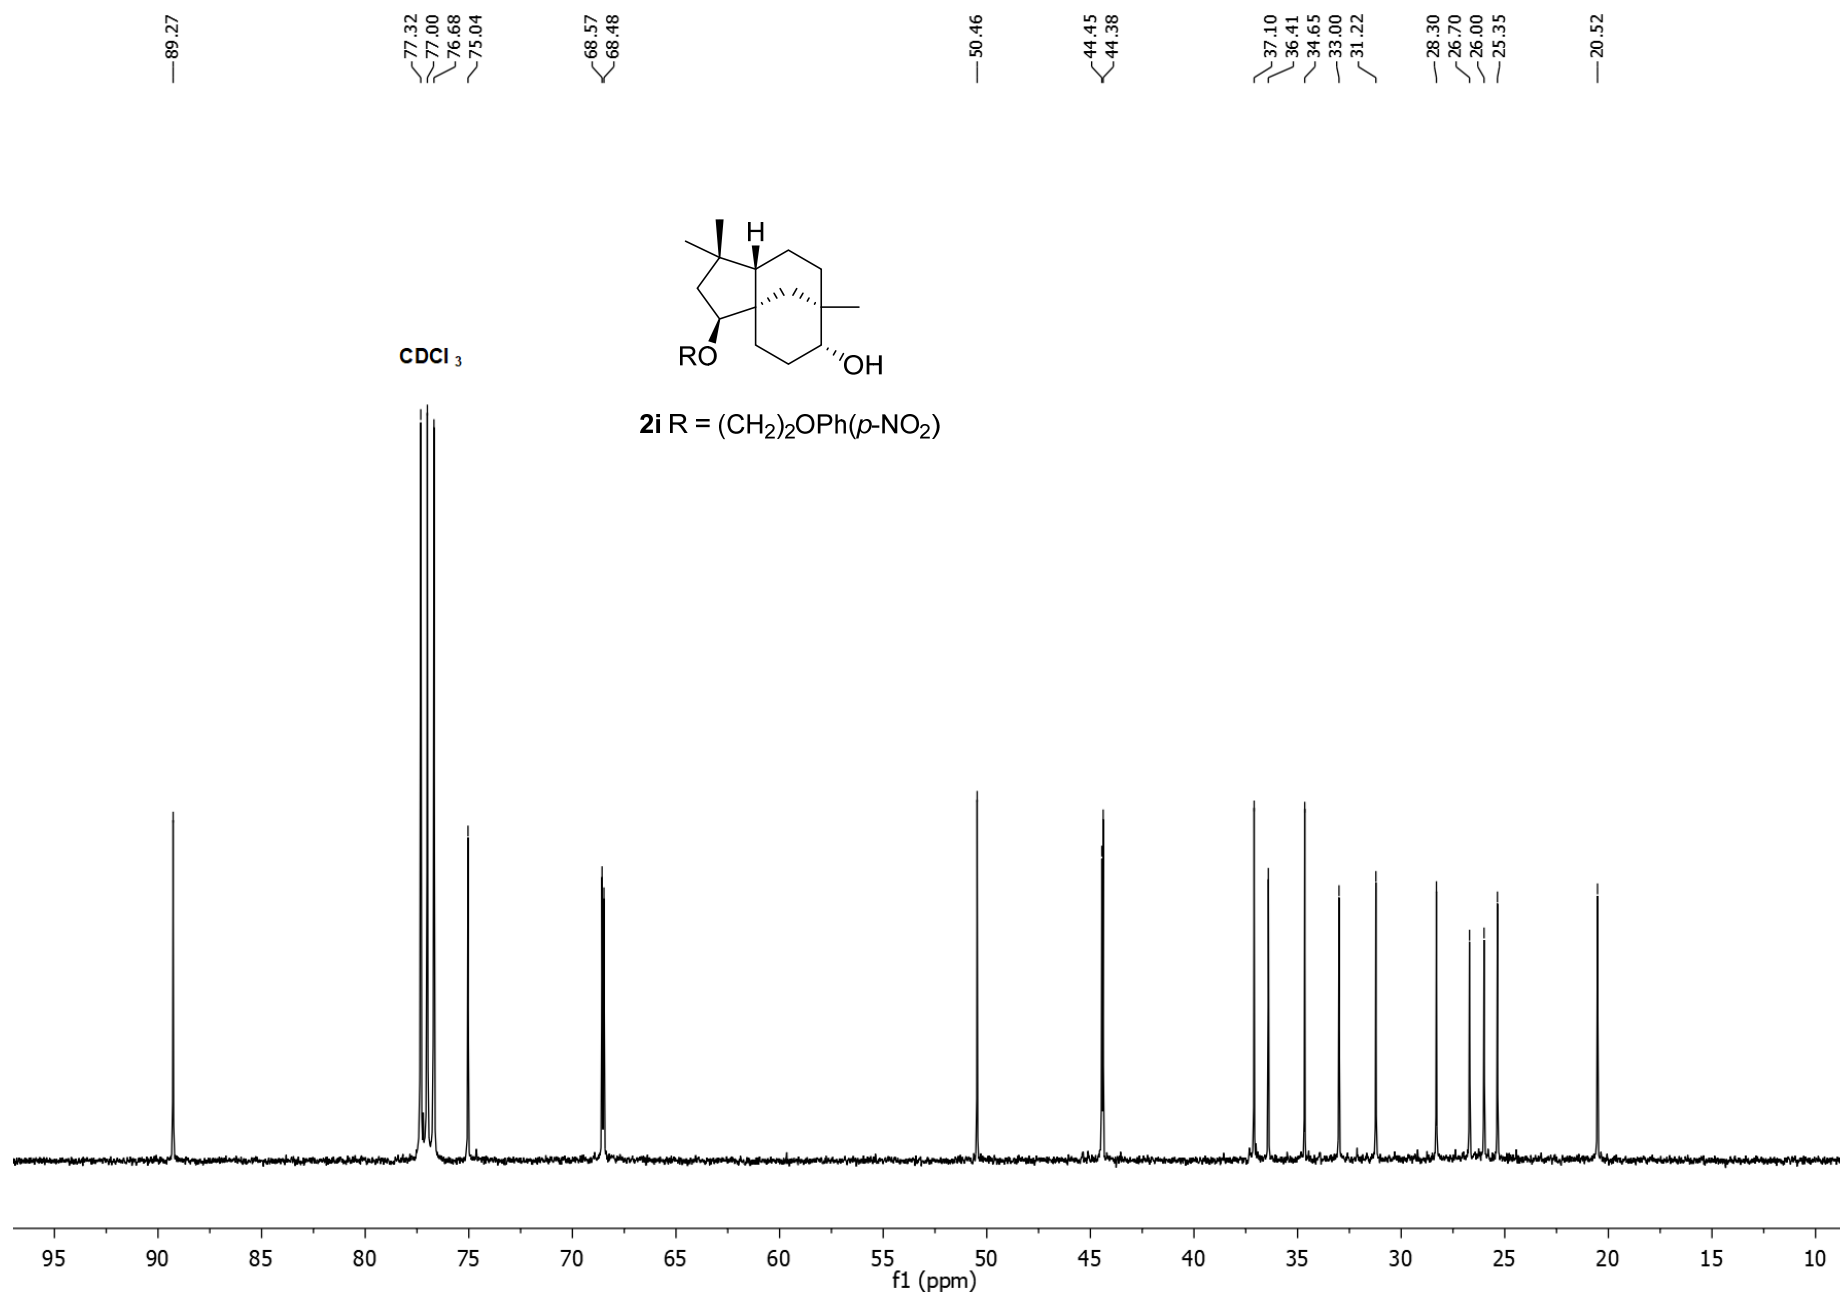

**Figure S12a.** Expansion ( $\delta_C$  95-10) of  $^{13}C$  NMR spectrum of compound **2i** in  $CDCl_3$  (100 MHz).



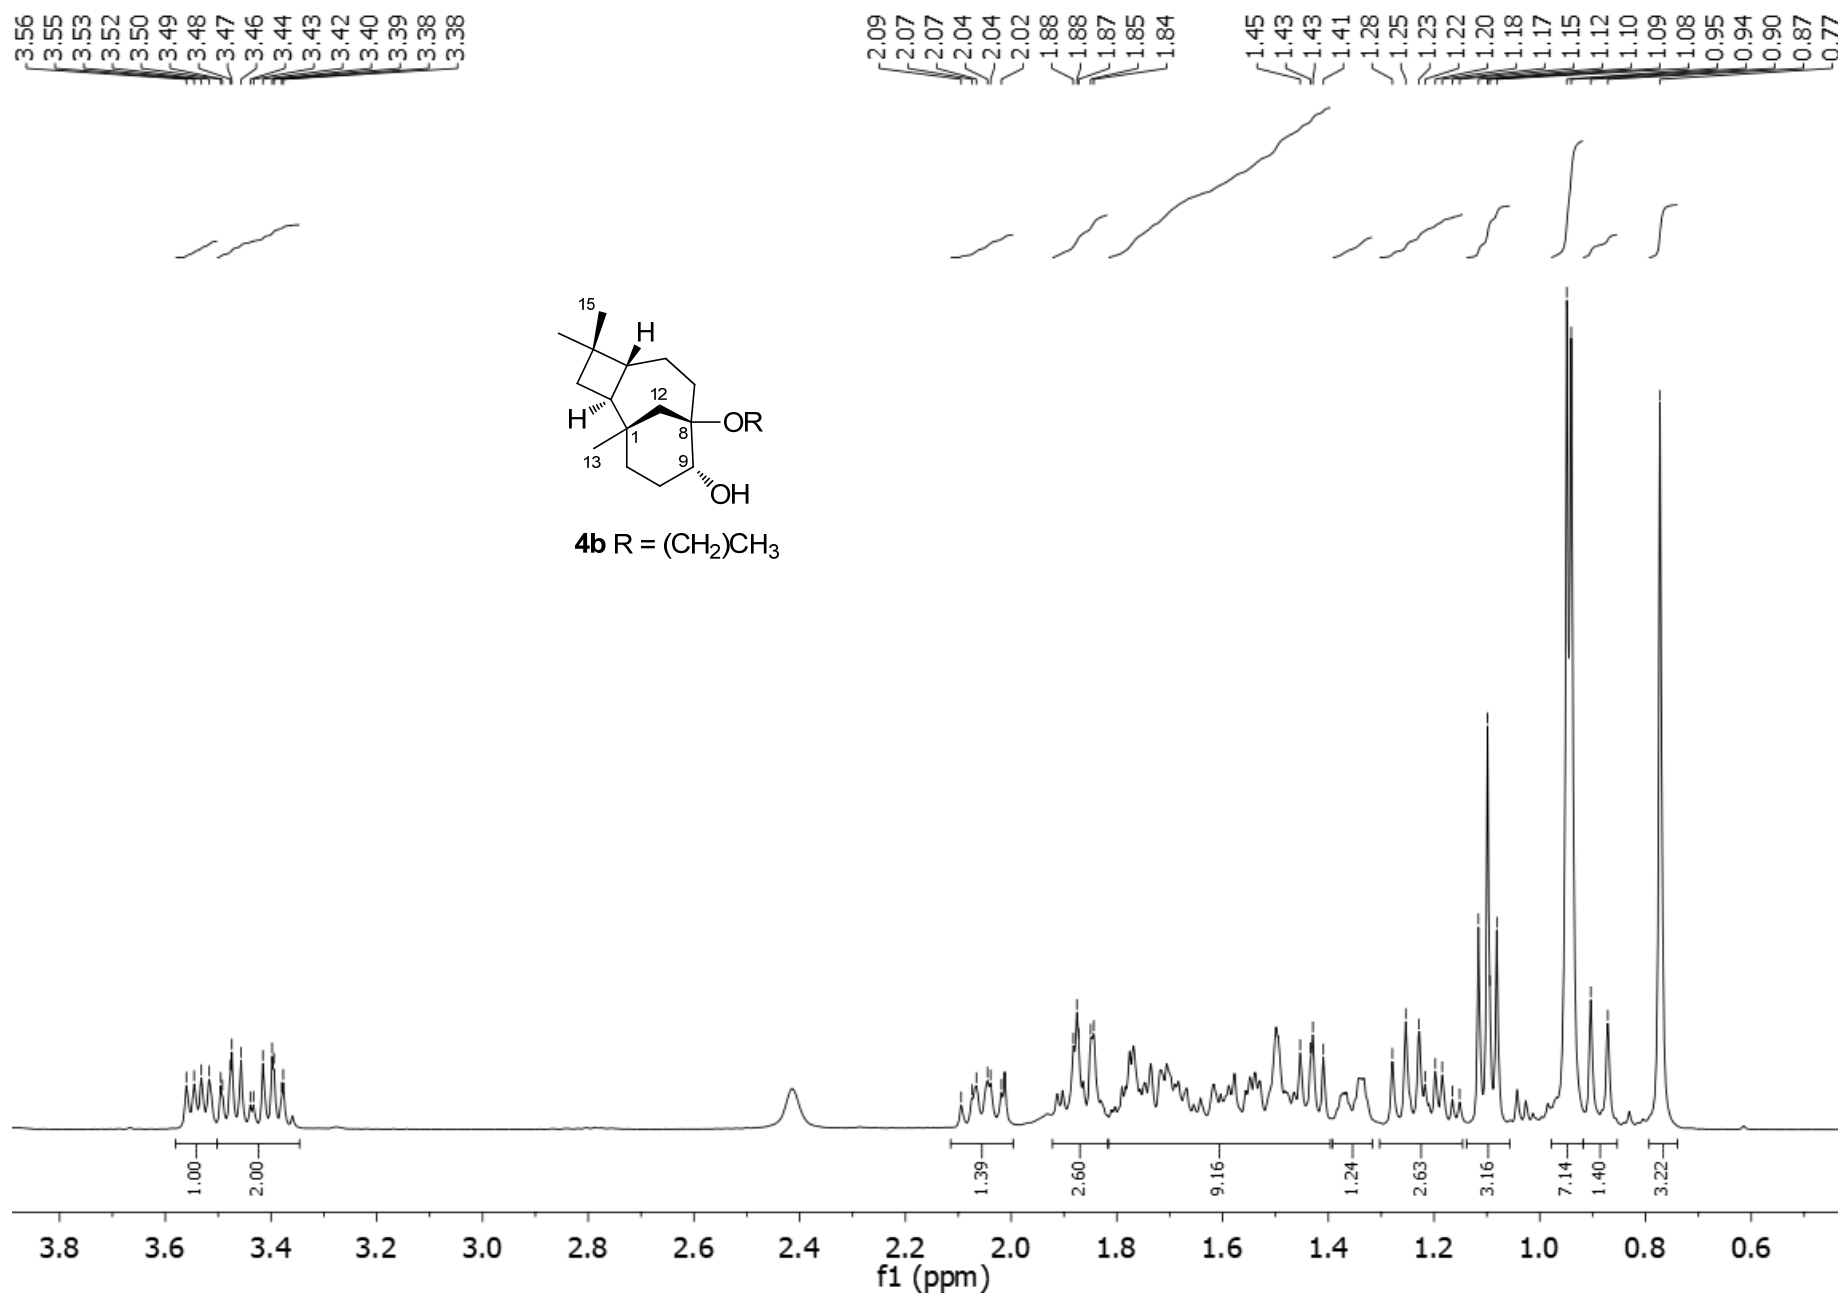

**Figure S13a.** Expansion ( $\delta_H$  3.8-0.5) of  $^1H$  NMR spectrum of compound **4b** in  $CDCl_3$  (400 MHz).



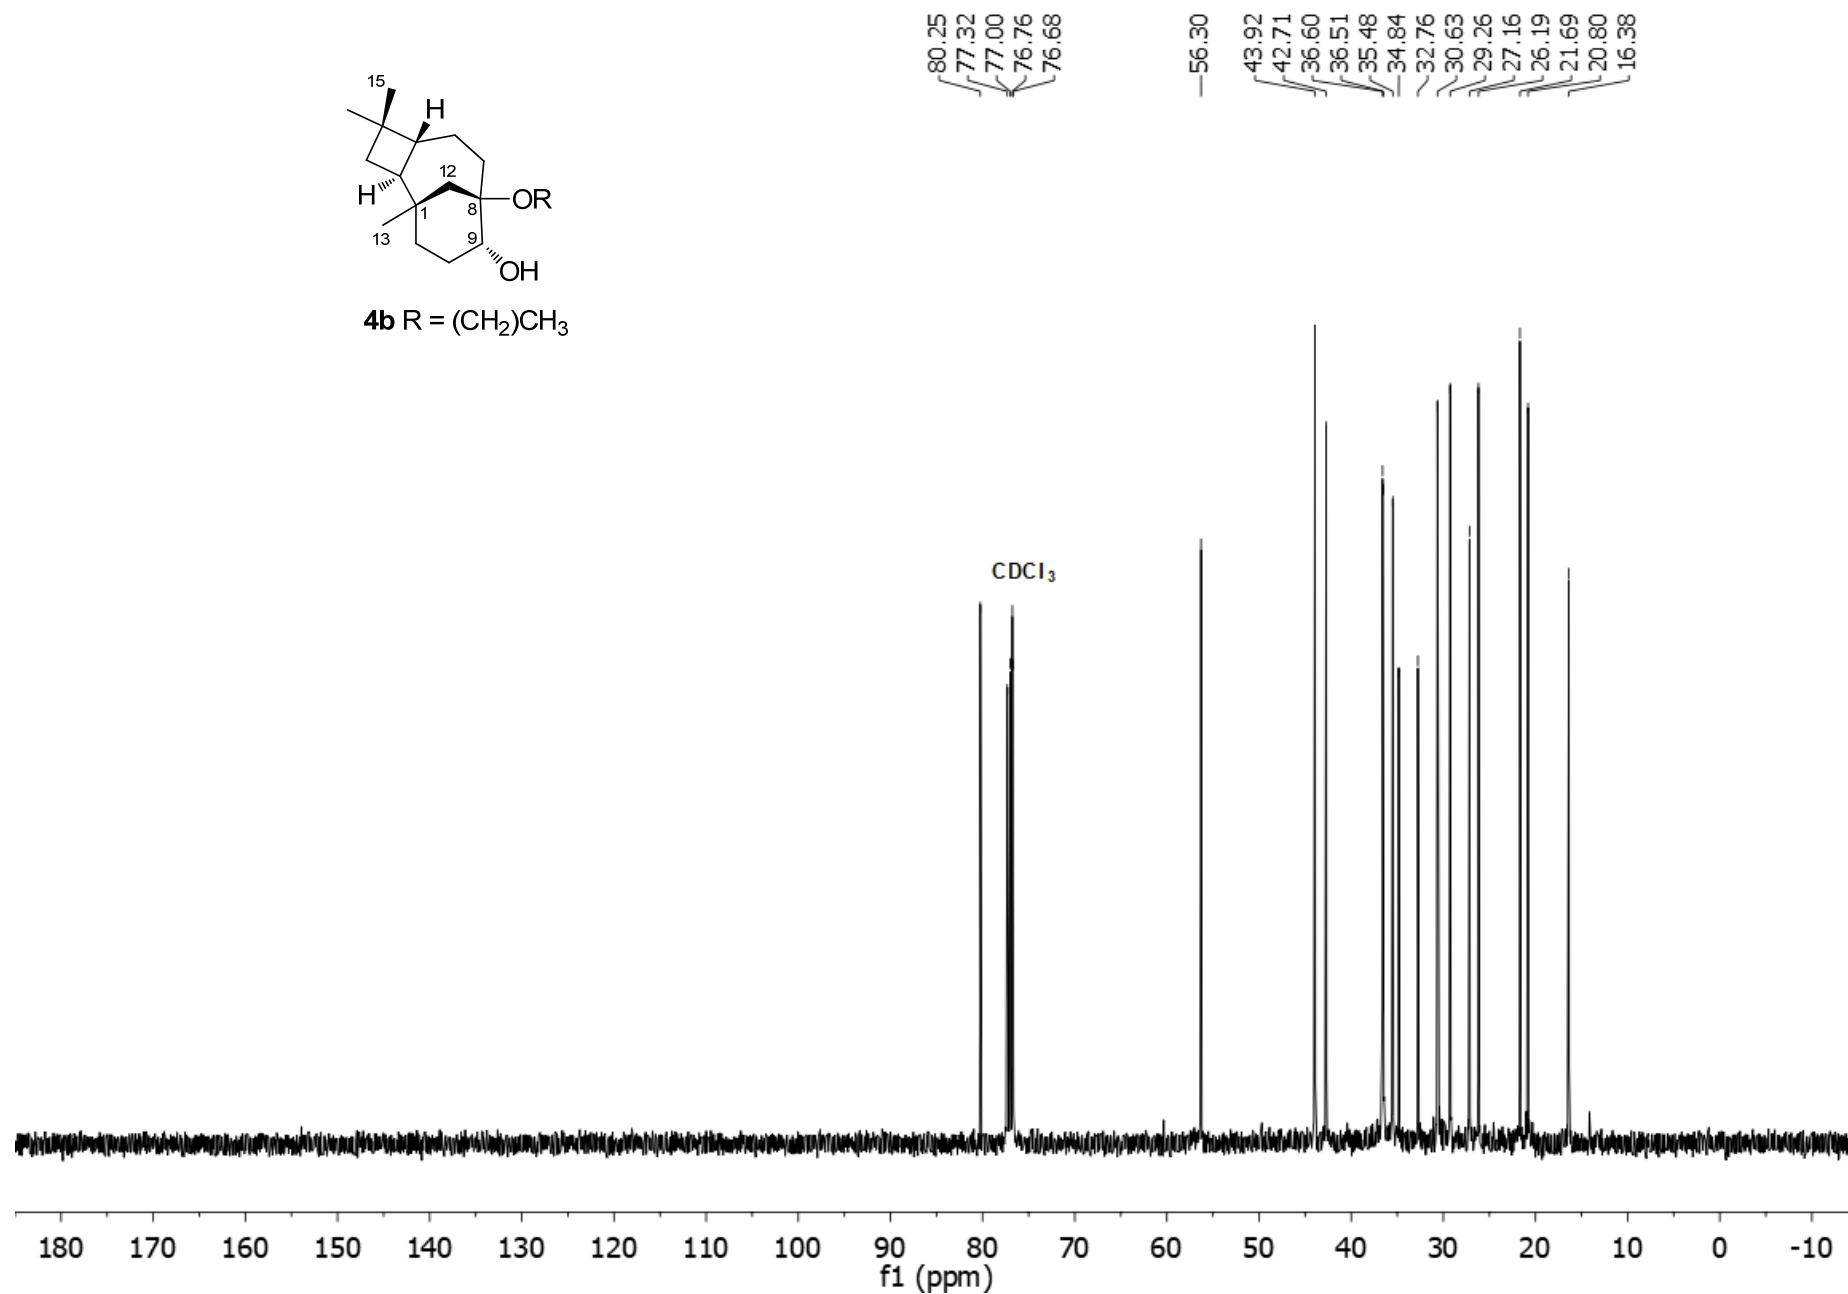

**Figure S14.**  $^{13}C$  NMR spectrum of compound **4b** in  $CDCl_3$  (100 MHz).

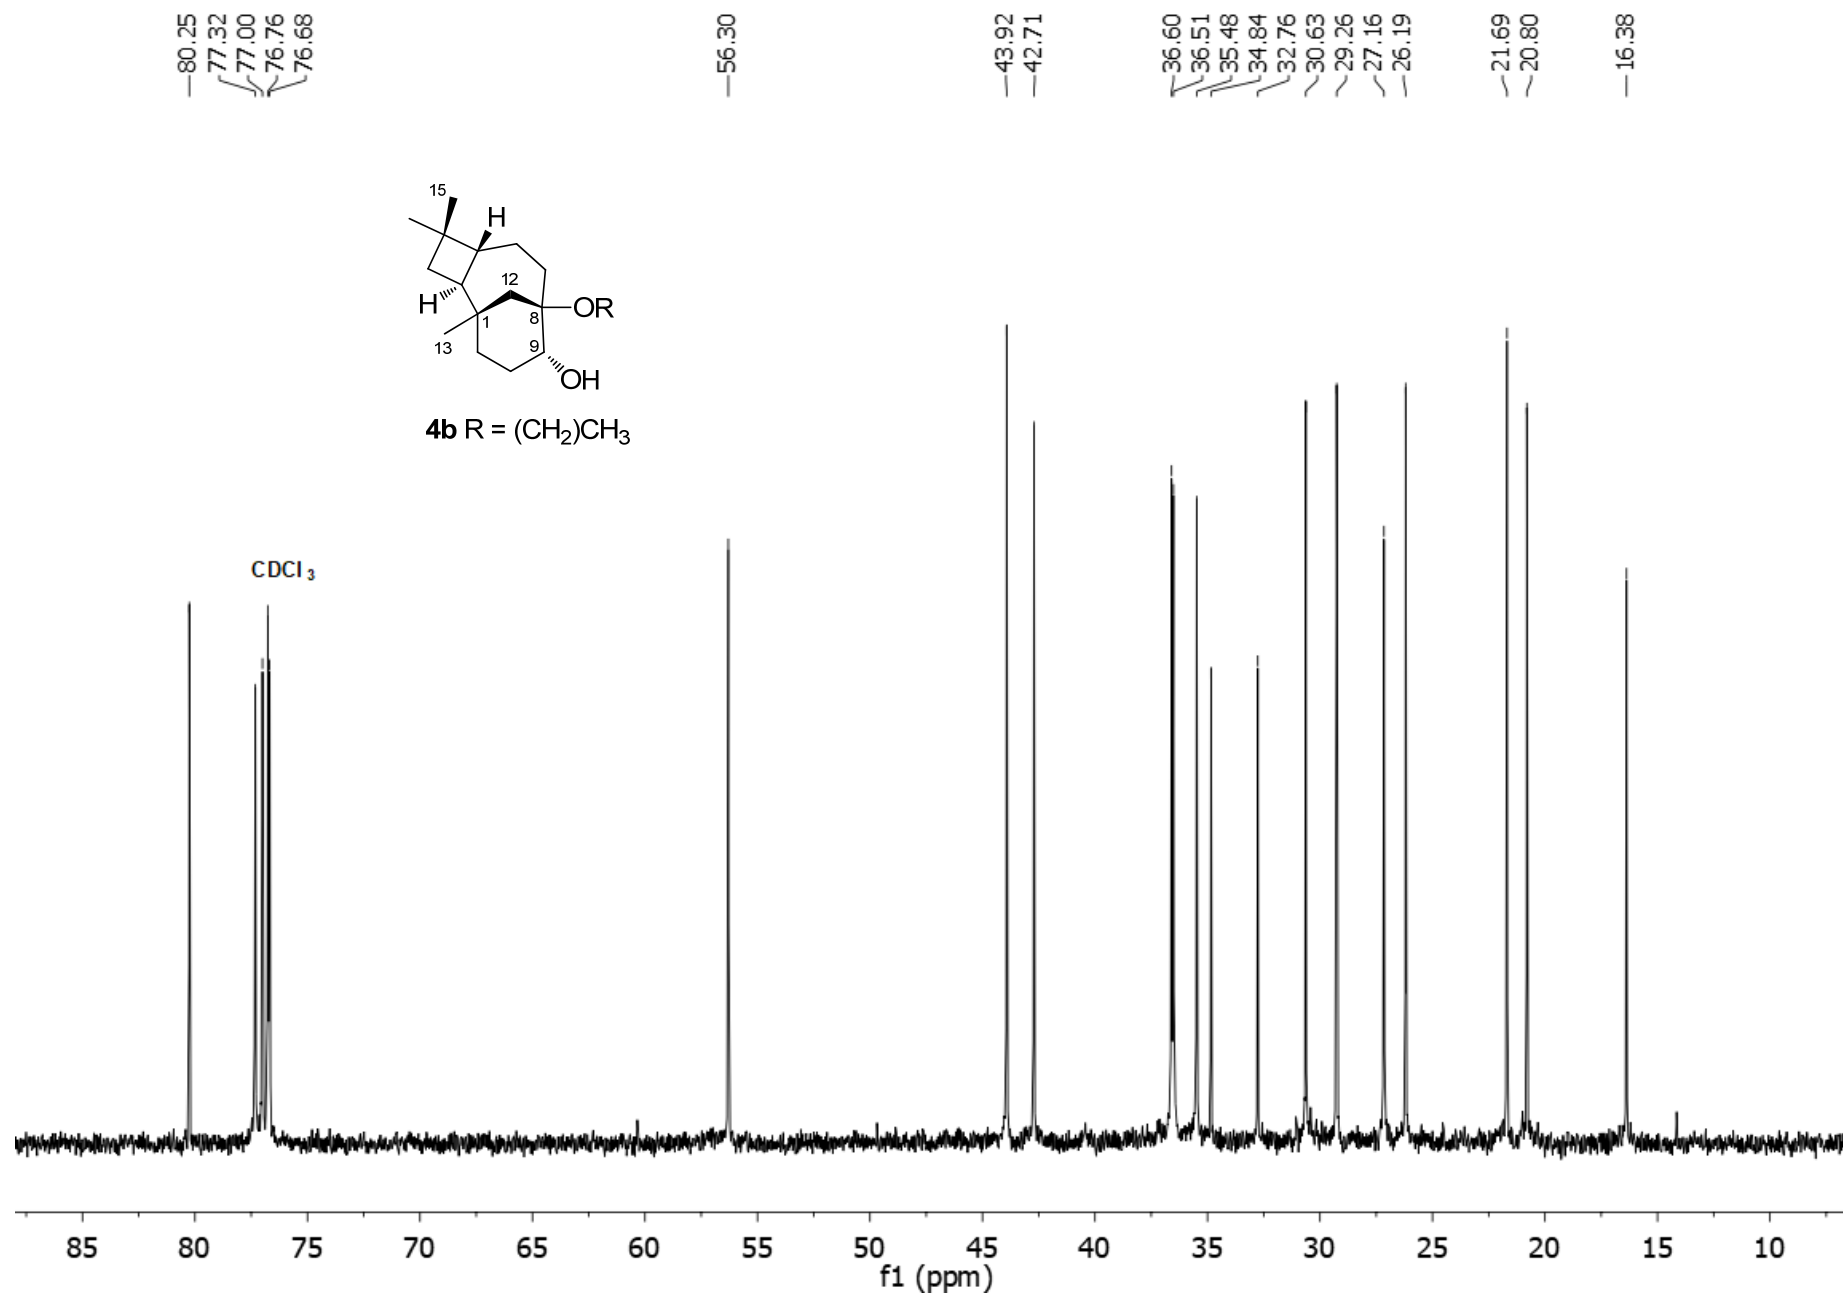

**Figure S14a.** Expansion ( $\delta_C$  95-10) of  $^{13}C$  NMR spectrum of compound **4b** in CDCl<sub>3</sub> (100 MHz).

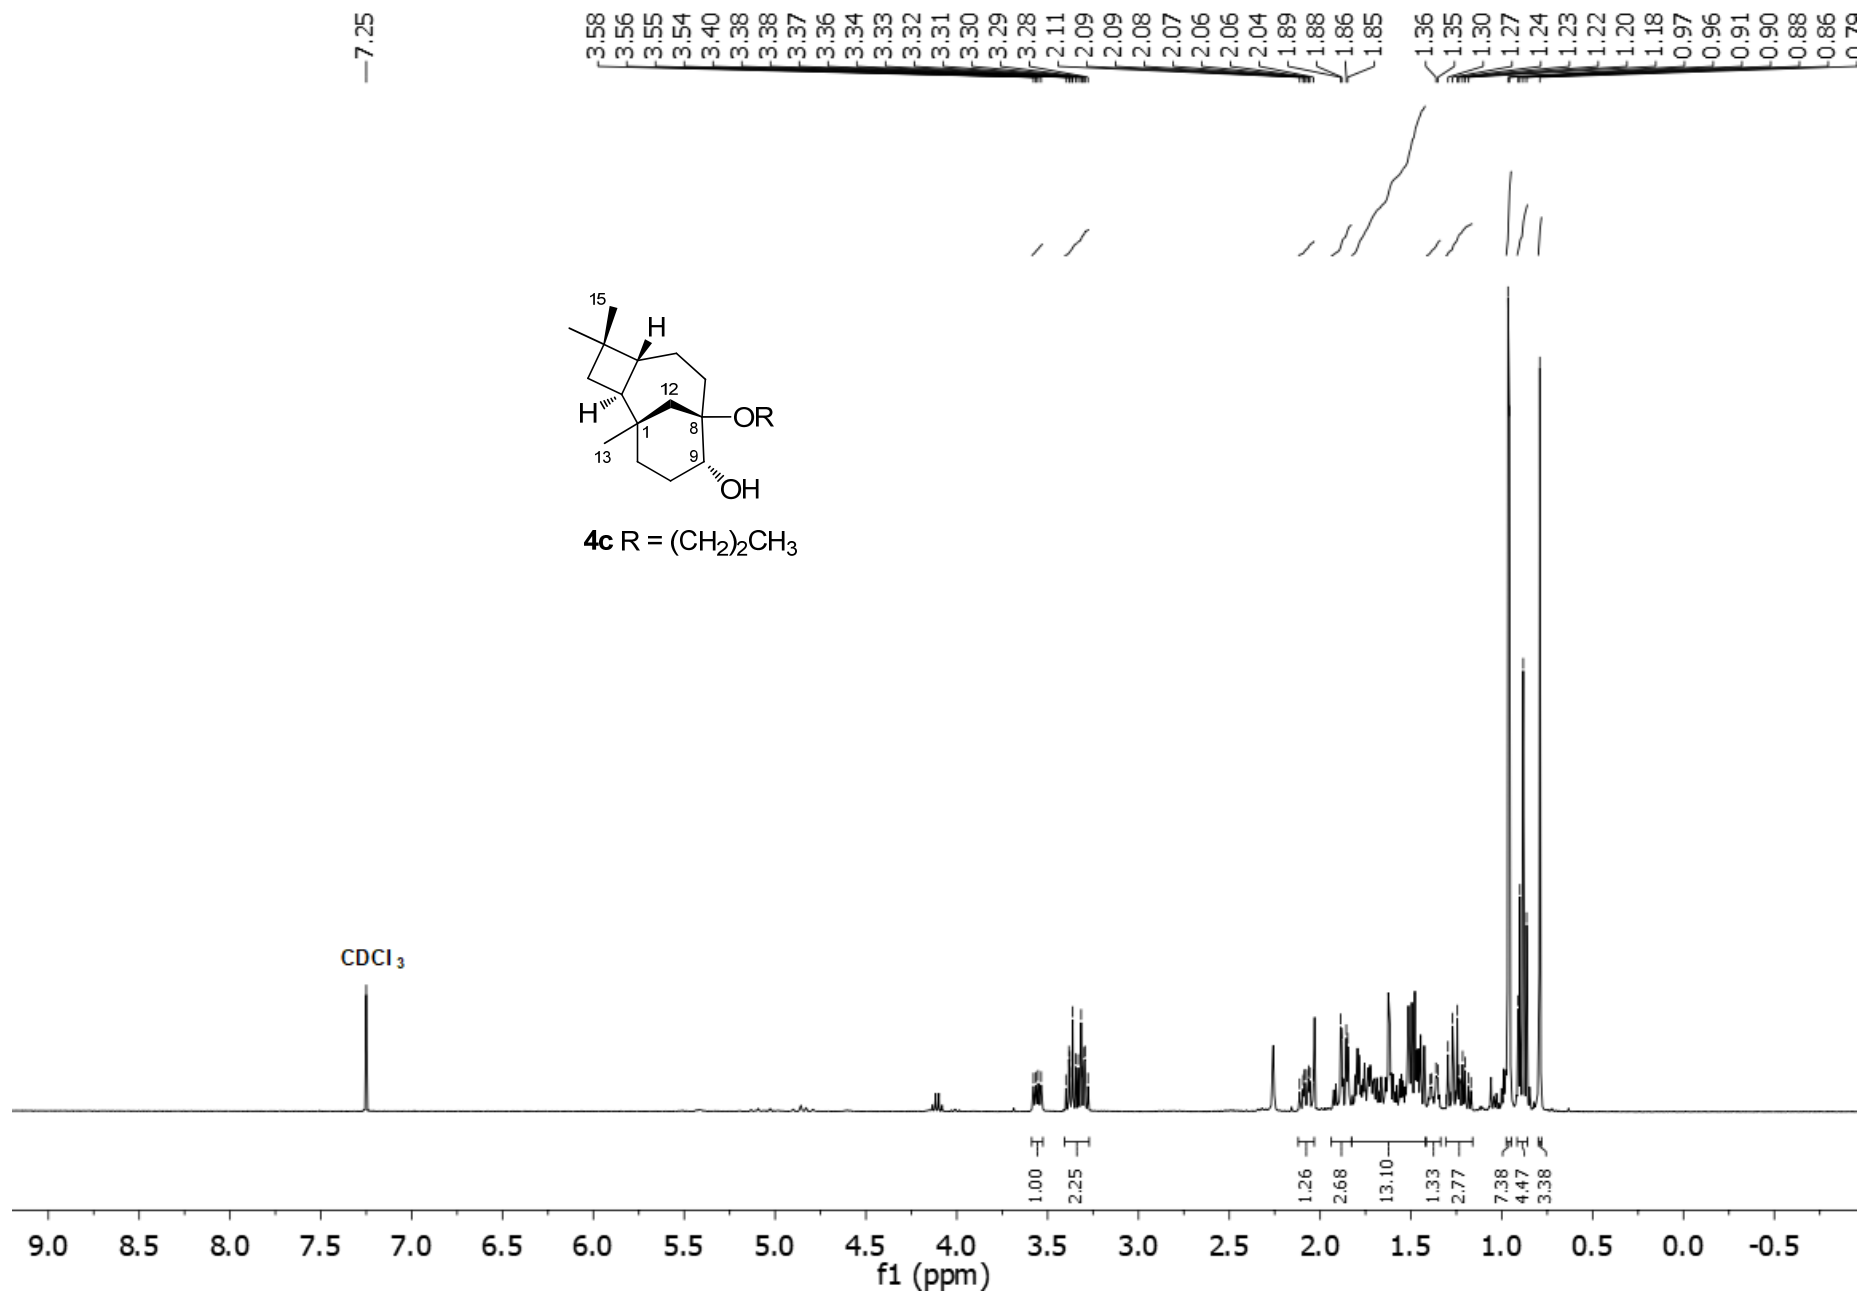

**Figure S15.** <sup>1</sup>H NMR spectrum of compound **4c** in CDCl<sub>3</sub> (400 MHz).

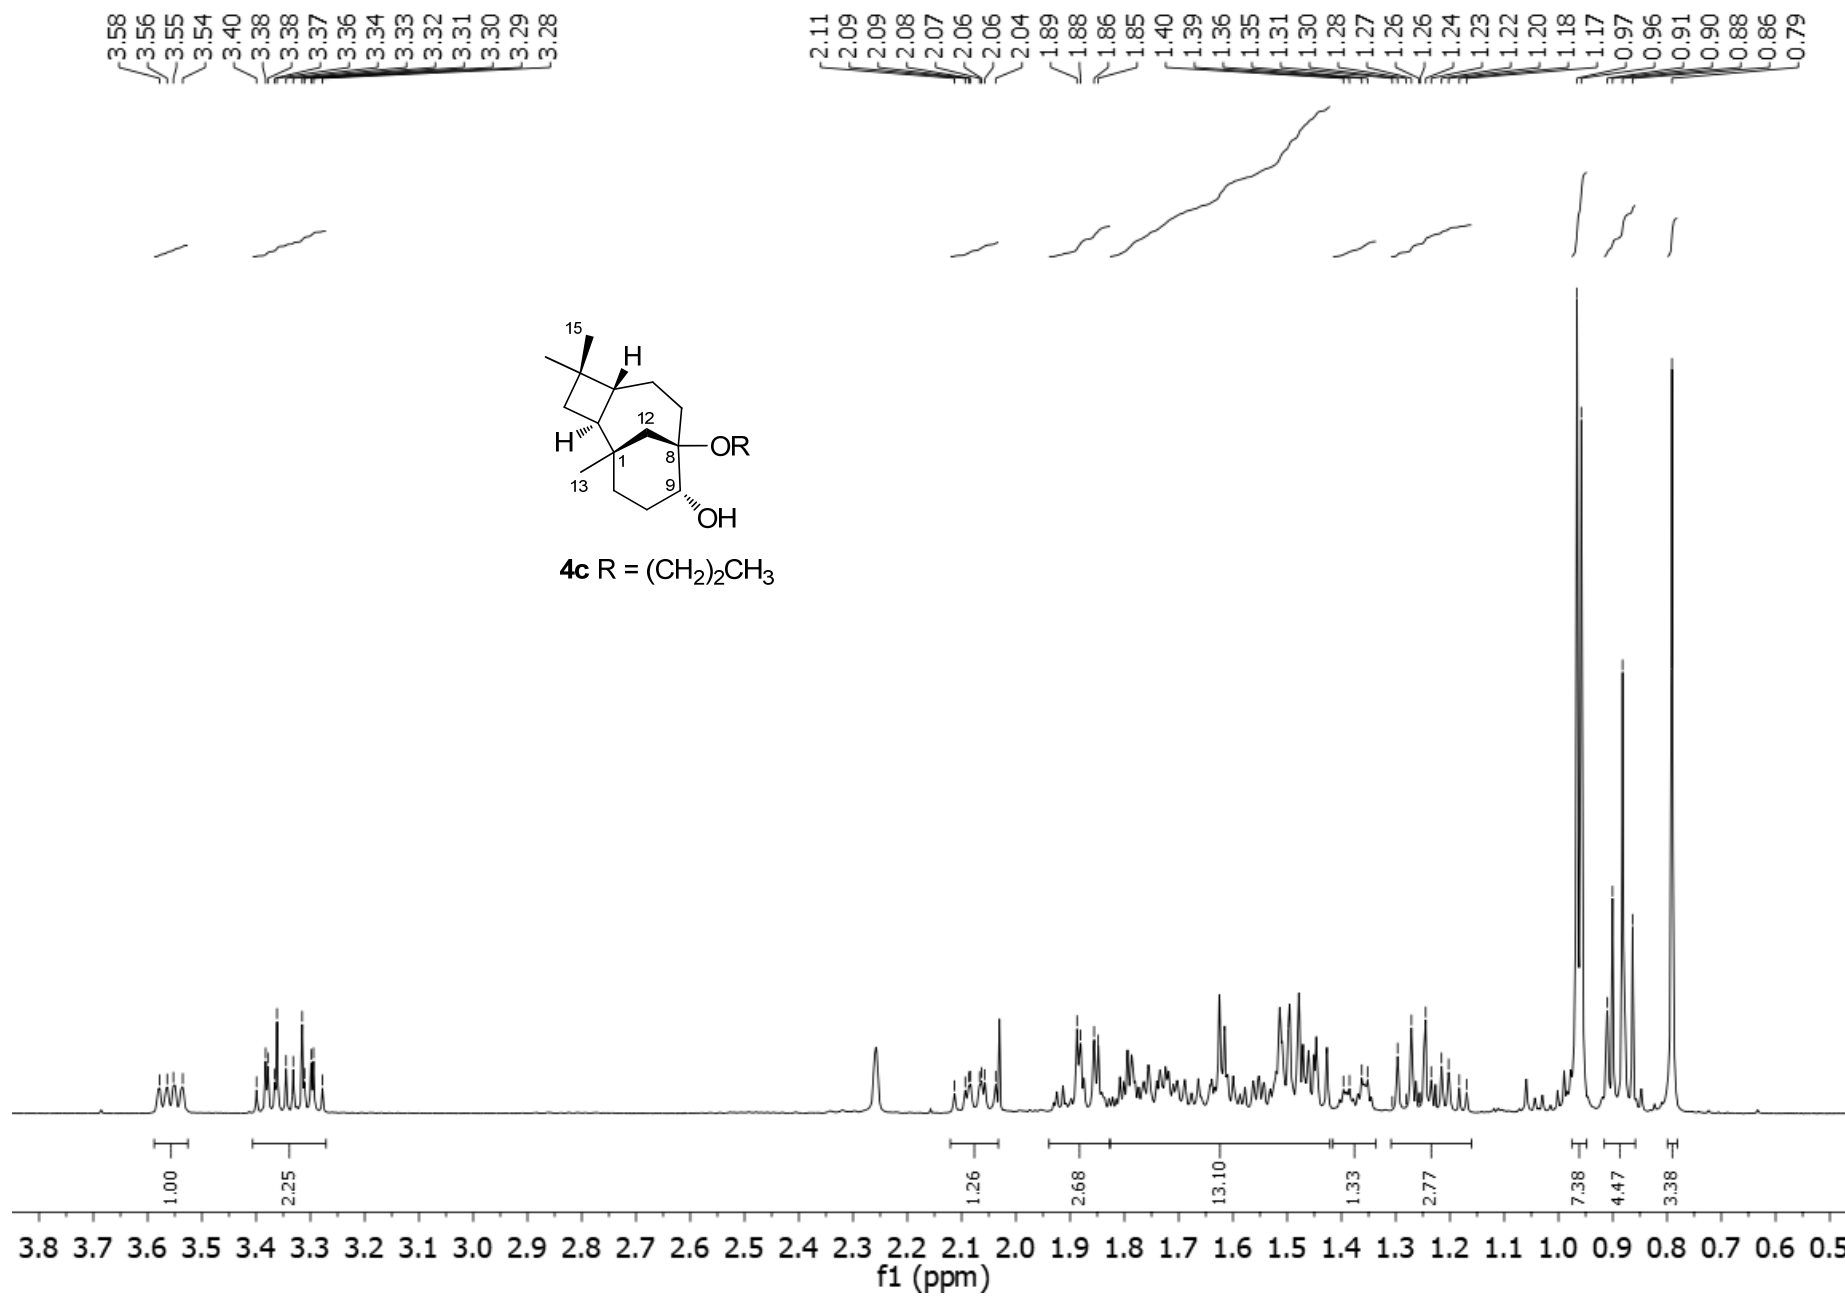

**Figure S15a.** Expansion ( $\delta_H$  3.8-0.5) of  $^1H$  NMR spectrum of compound **4c** in CDCl<sub>3</sub> (400 MHz).

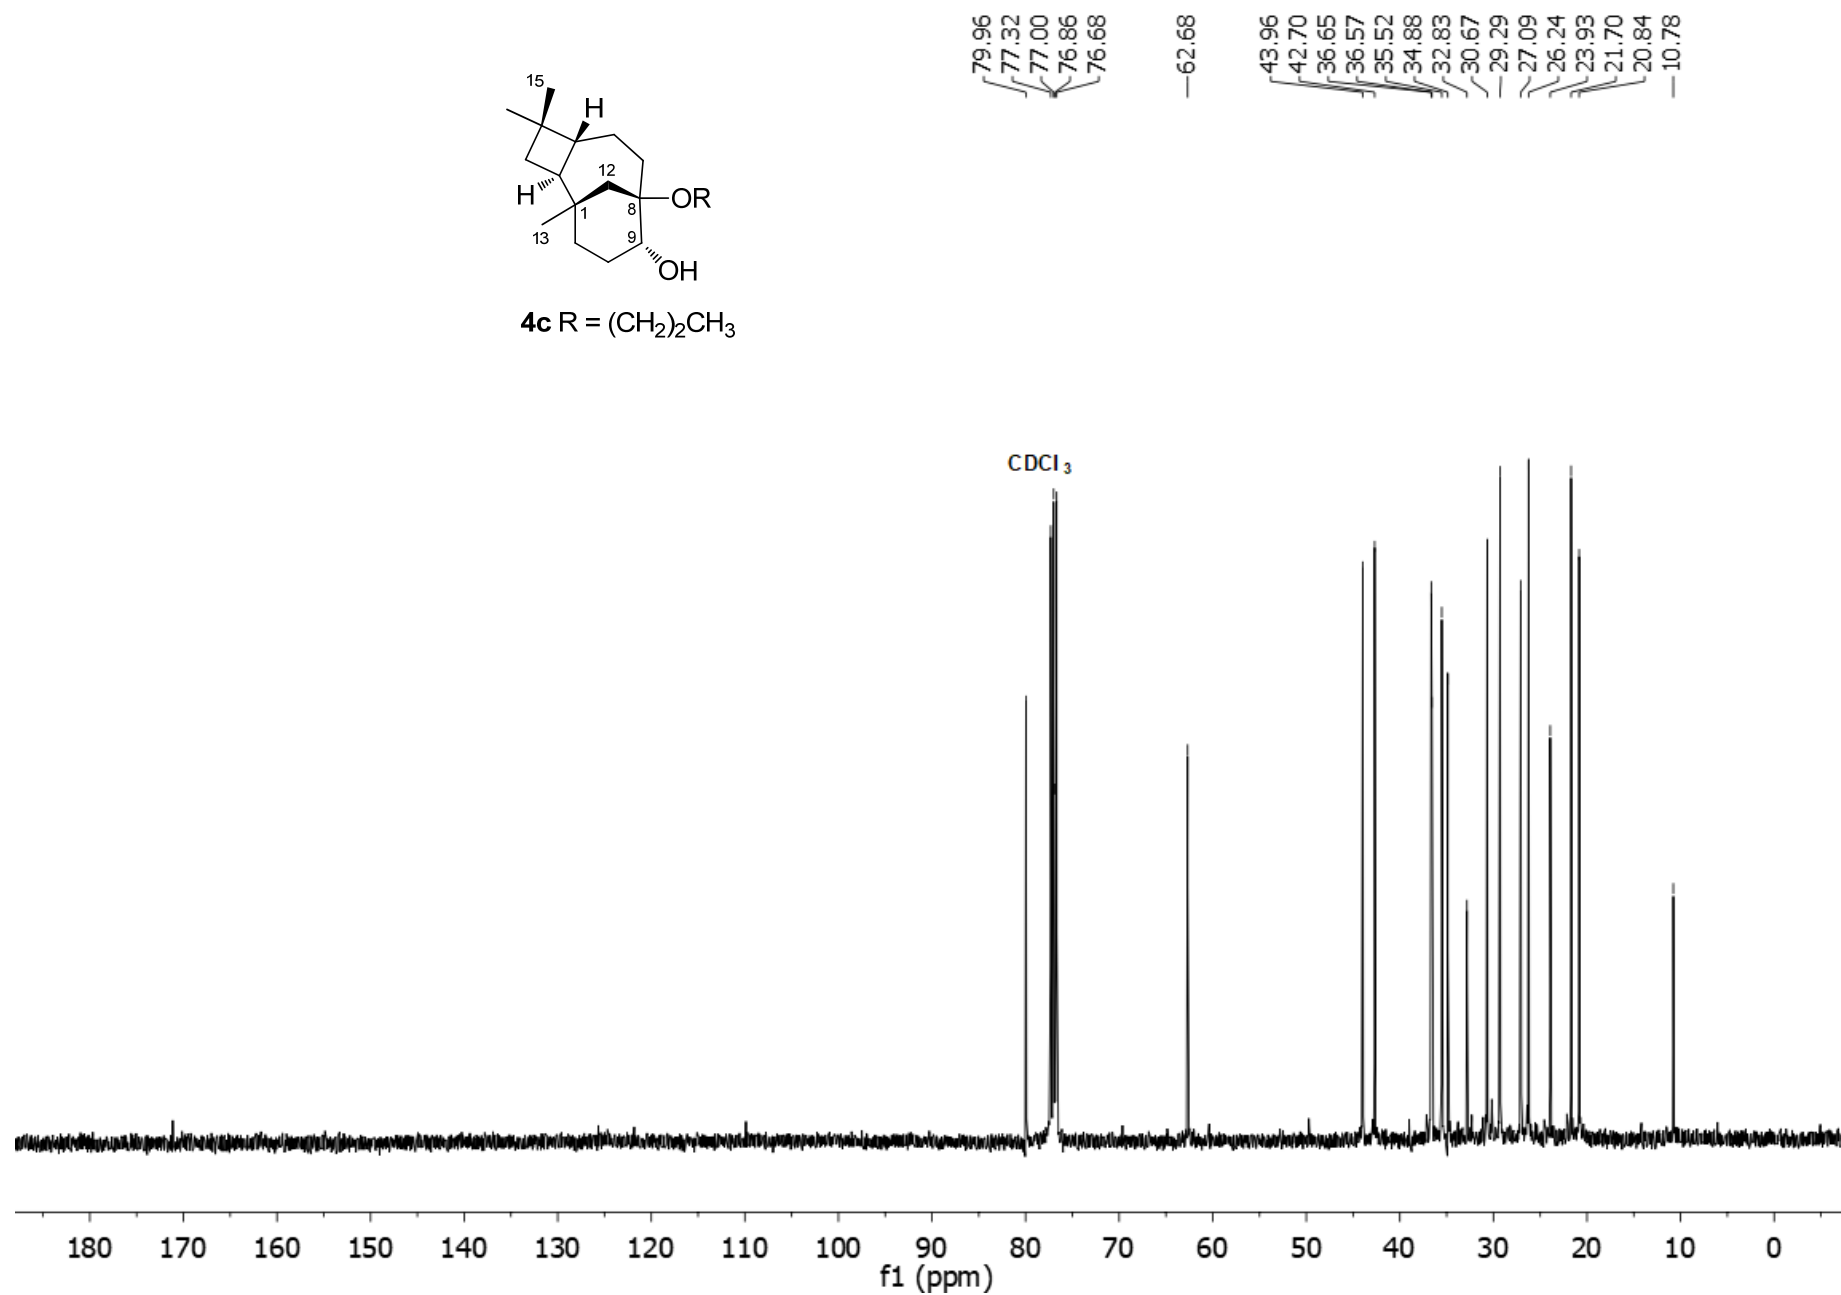

**Figure S16.**  $^{13}C$  NMR spectrum of compound **4c** in  $CDCl_3$  (100 MHz).

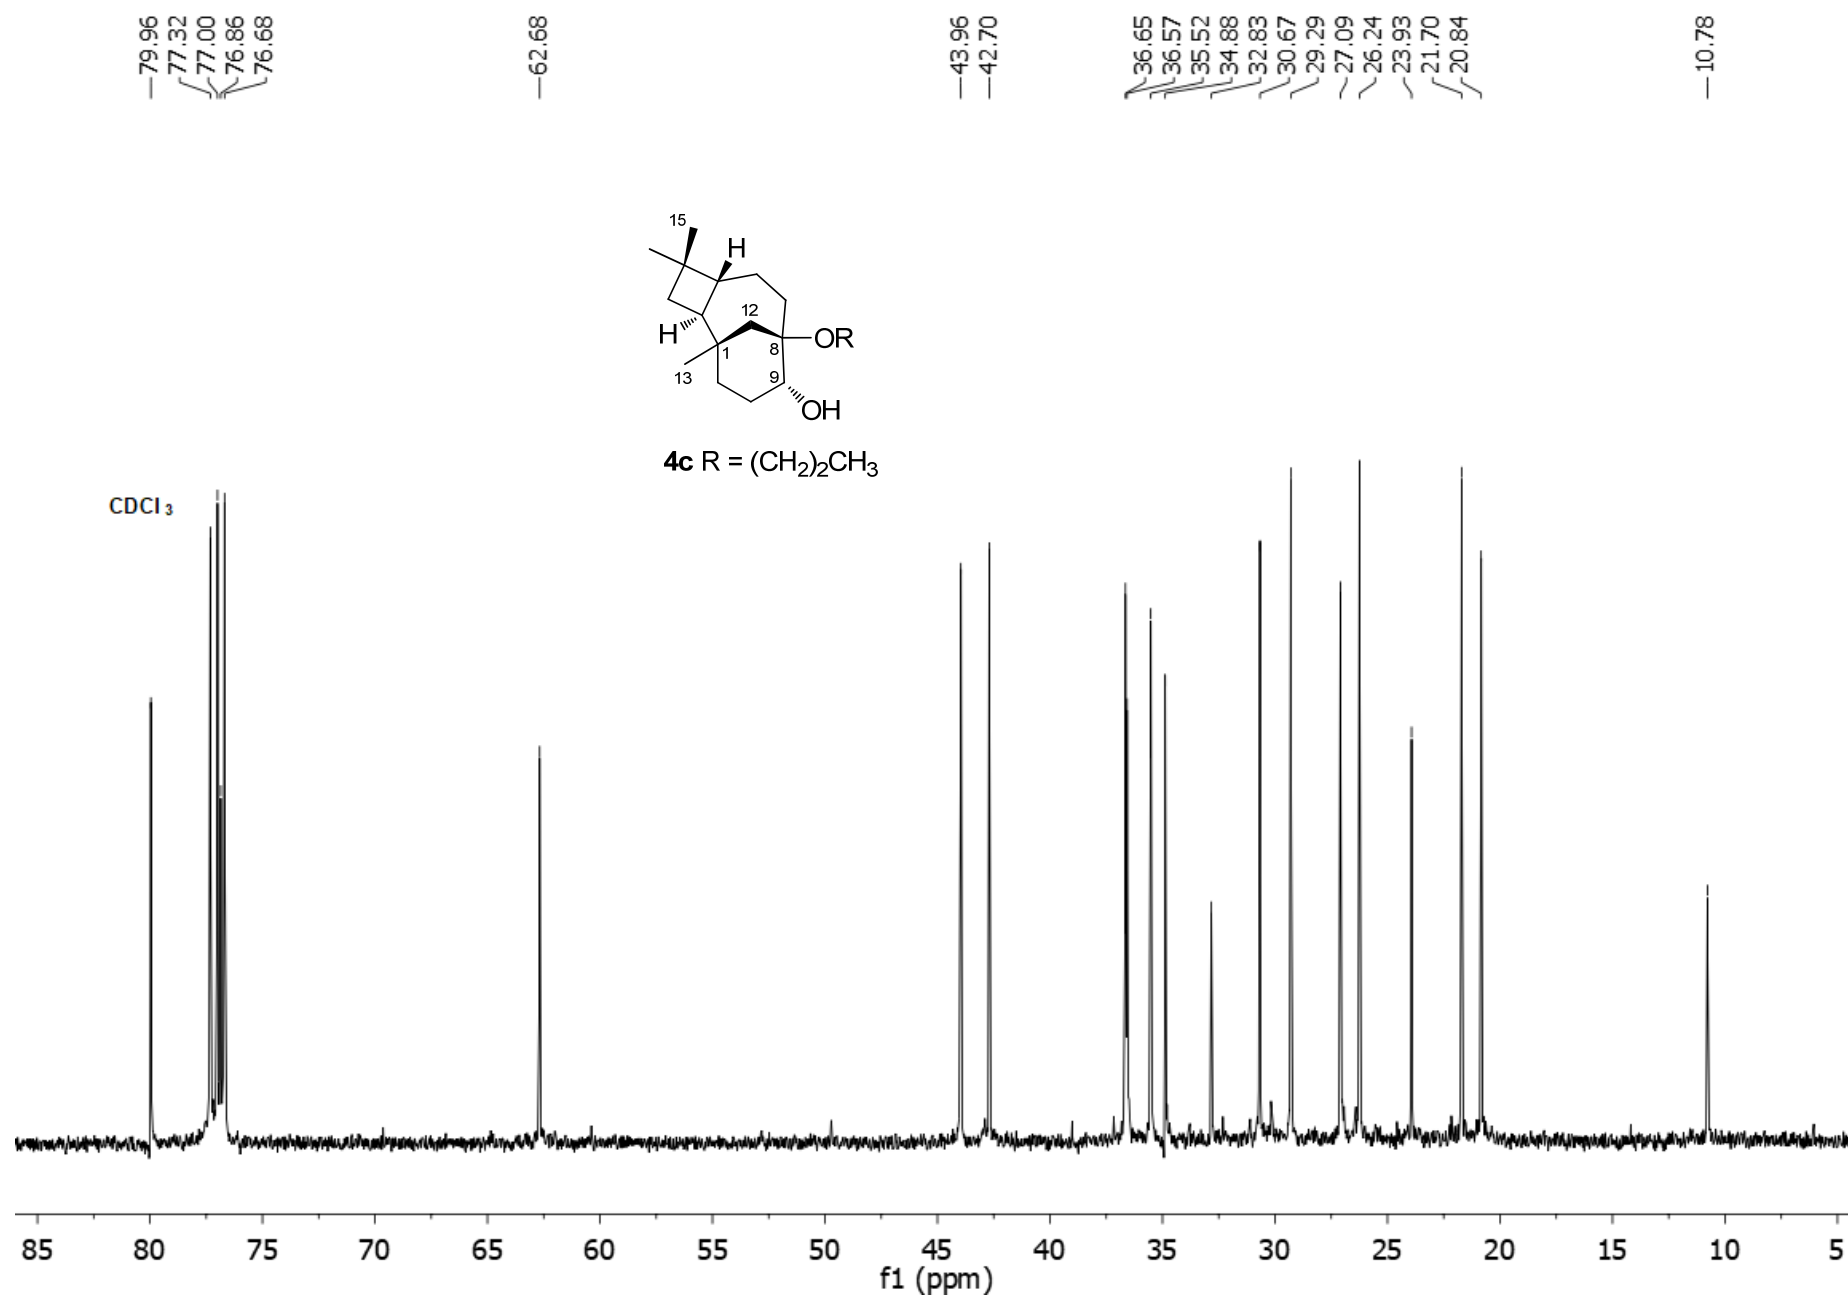

**Figure S16a.** Expansion ( $\delta$  85-5) of  $^{13}C$  NMR spectrum of compound **4c** in  $CDCl_3$  (100 MHz).

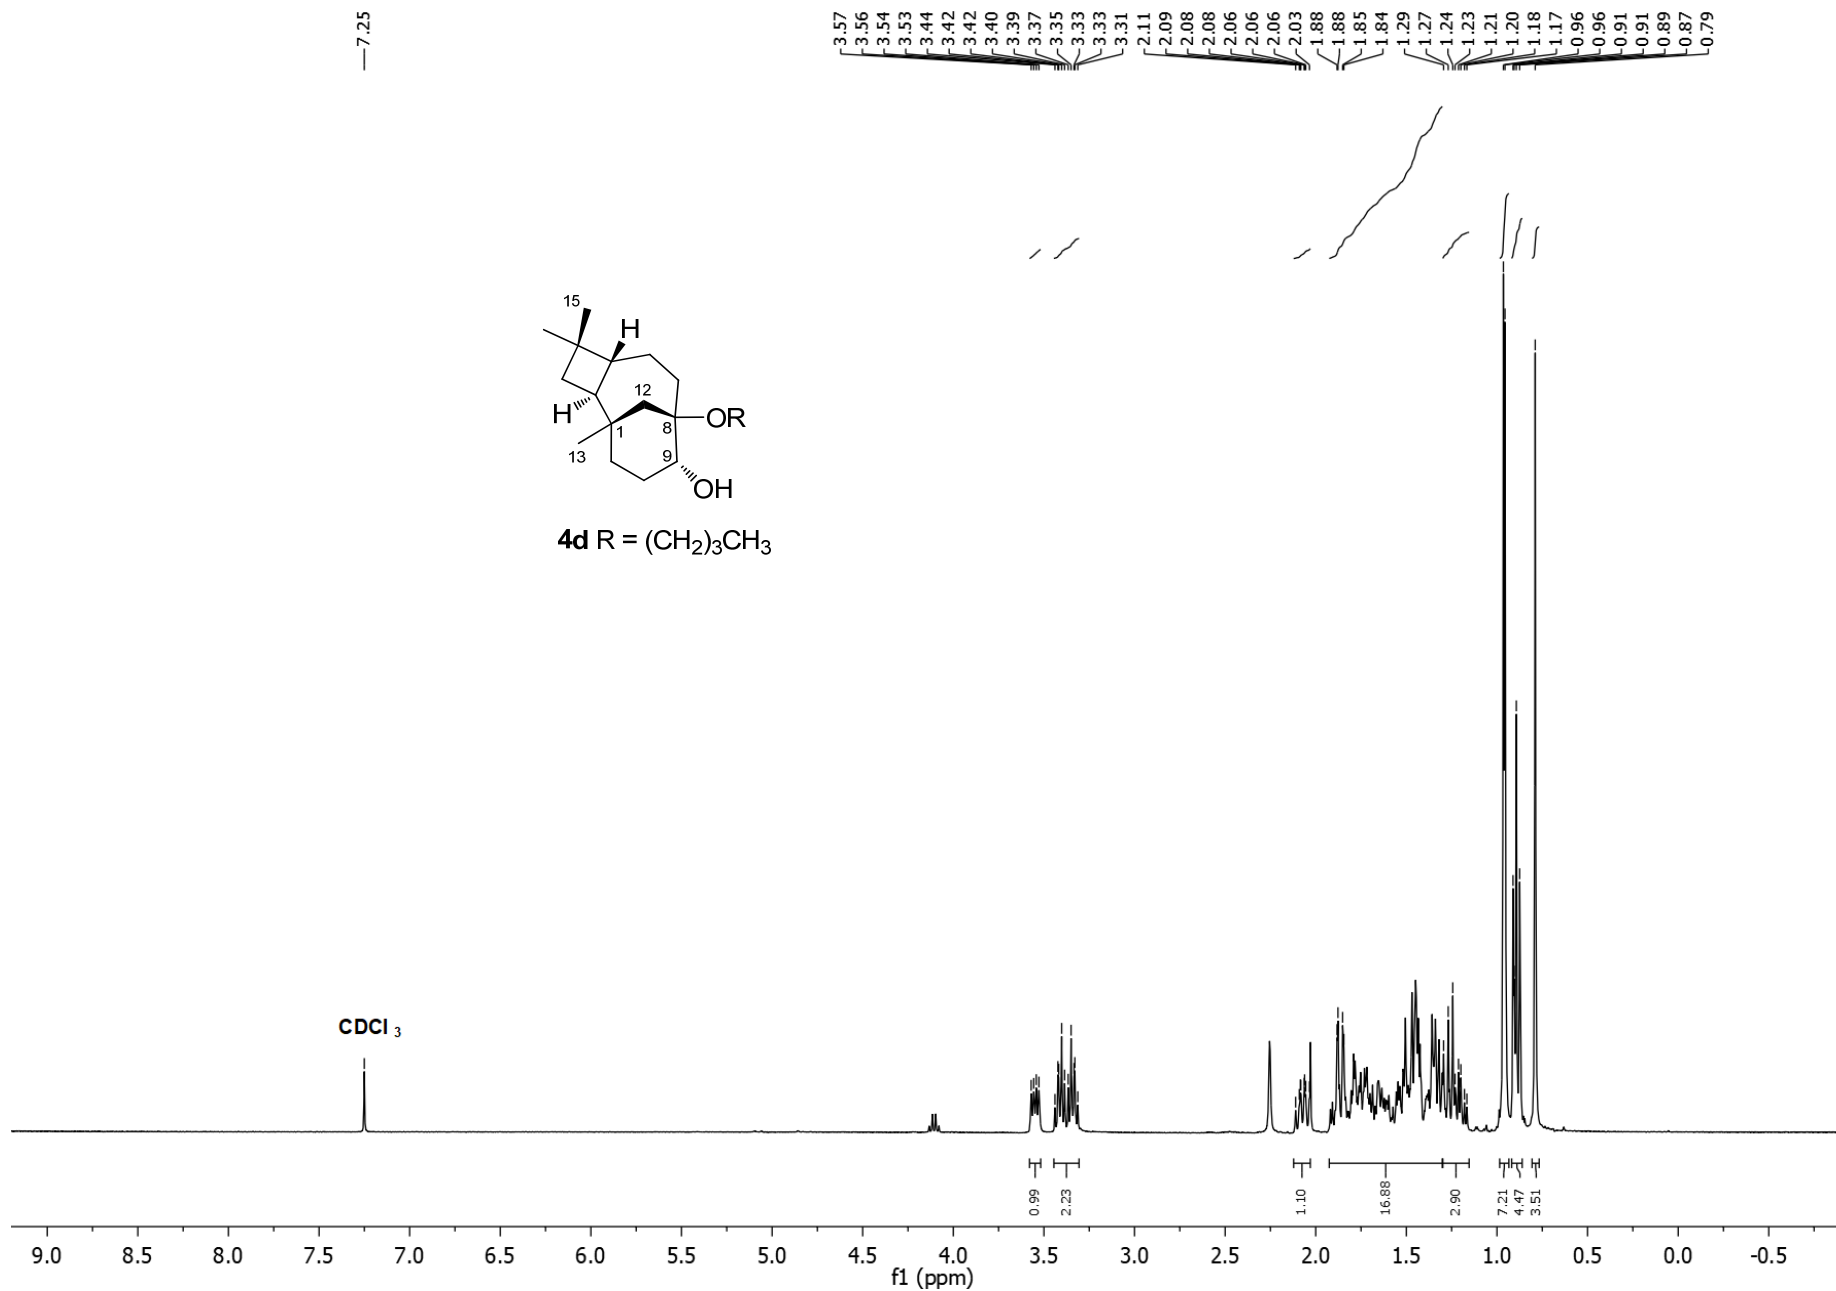

**Figure S17.**  $^1H$  NMR spectrum of compound **4d** in  $CDCl_3$  (400 MHz).

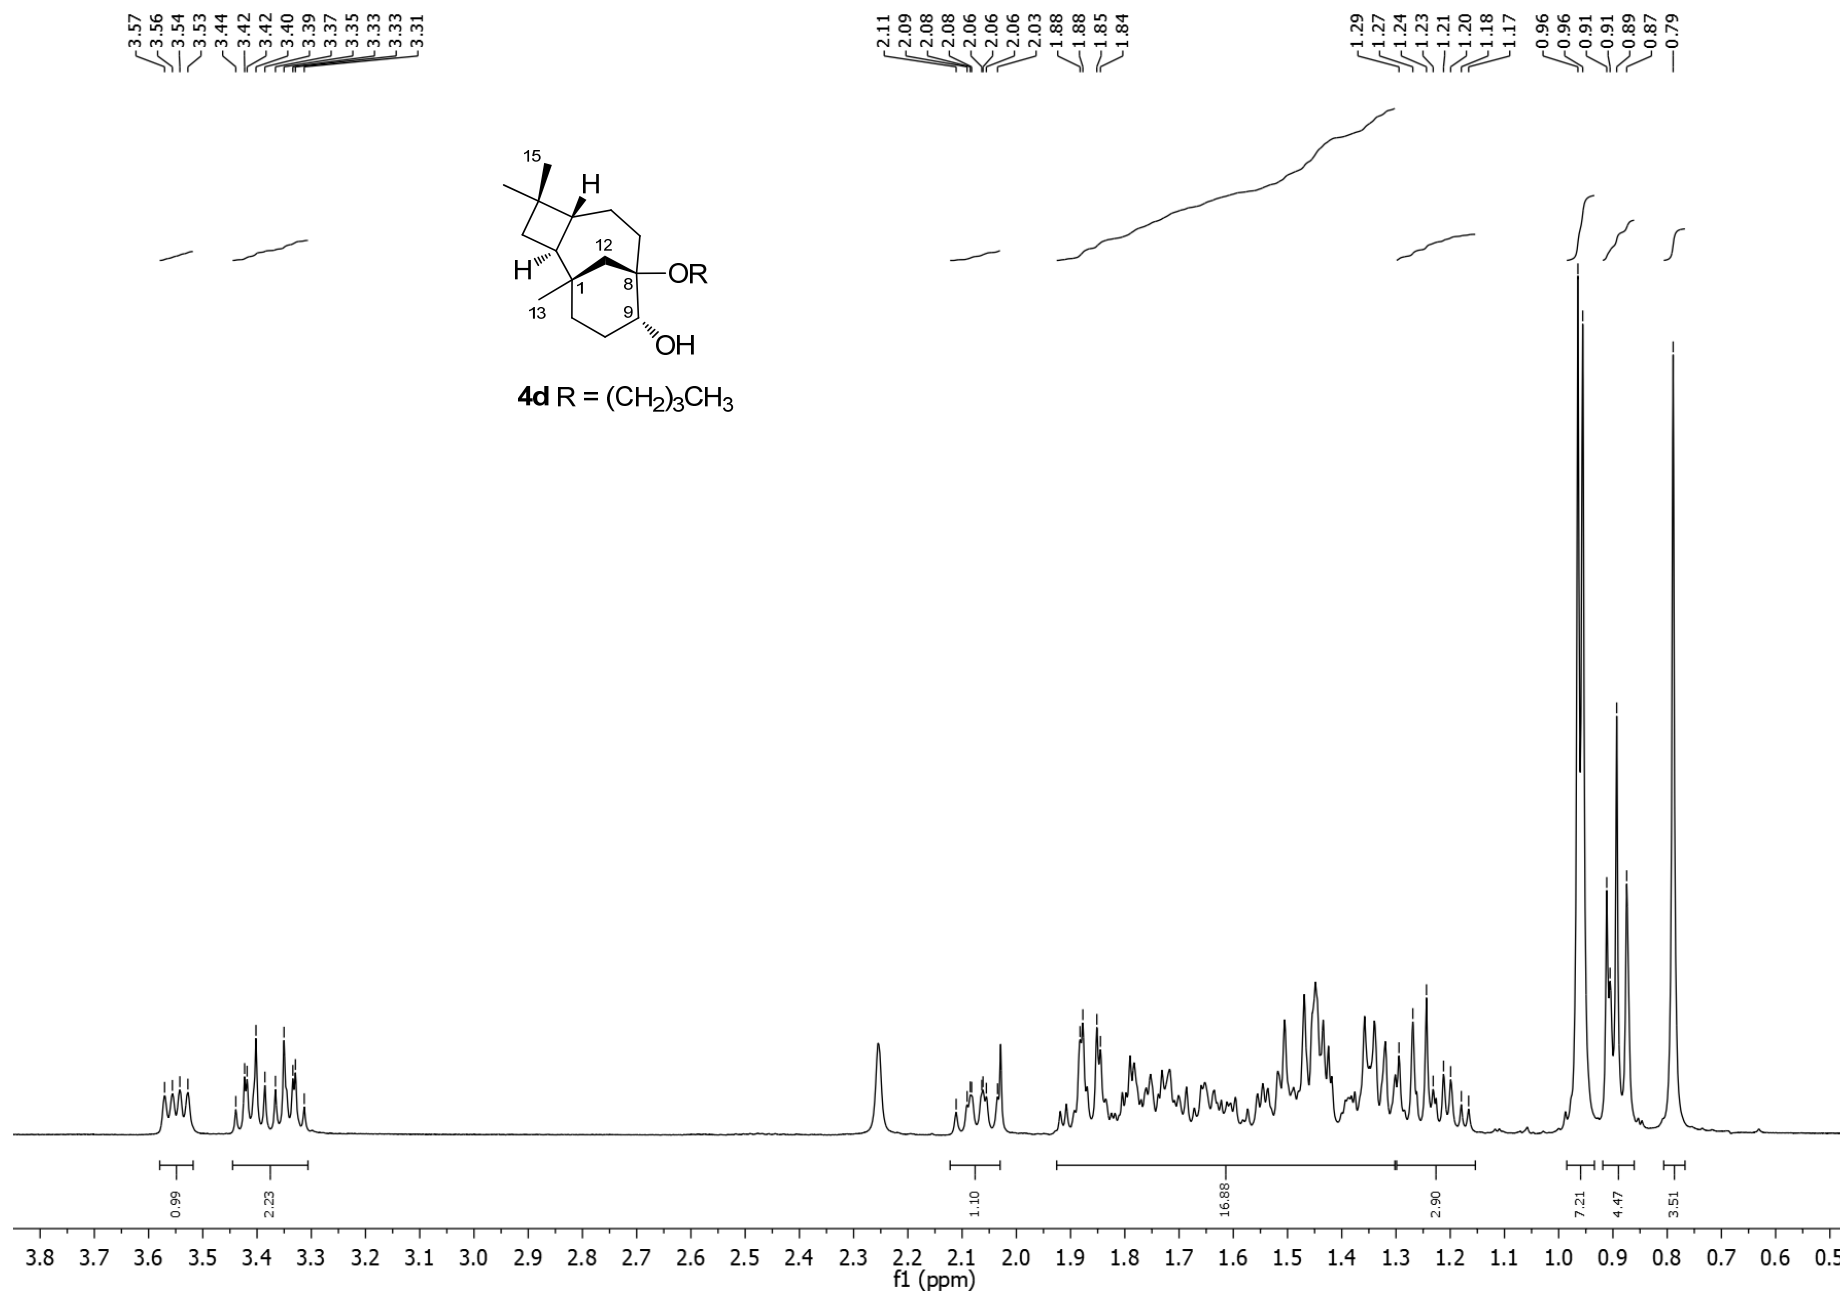

**Figure S17a.** Expansion ( $\delta_H$  3.8-0.5) of  $^1H$  NMR spectrum of compound **4d** in  $CDCl_3$  (400 MHz).



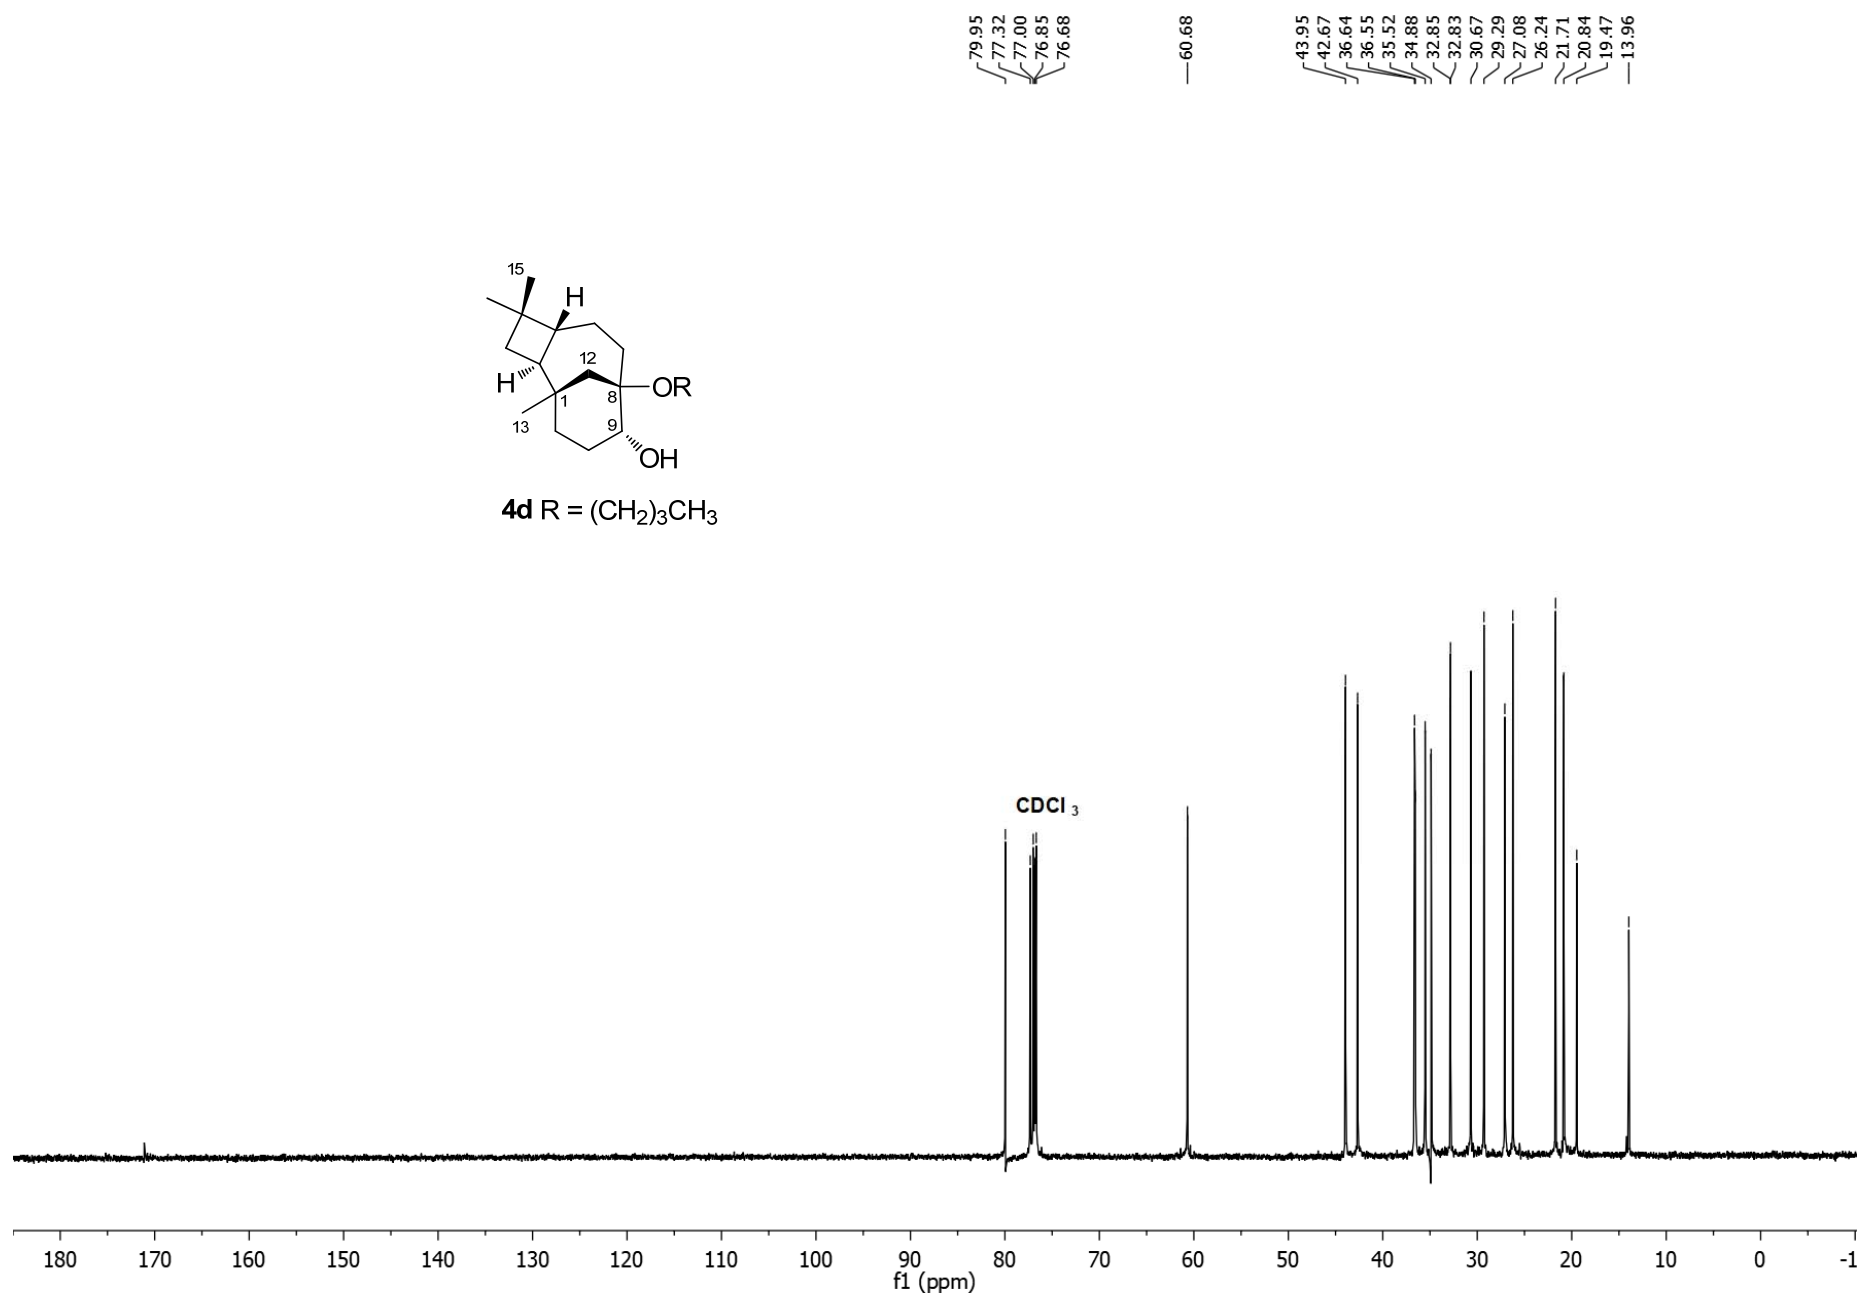

**Figure S18.** <sup>13</sup>C NMR spectrum of compound **4d** in CDCl<sub>3</sub> (100 MHz).

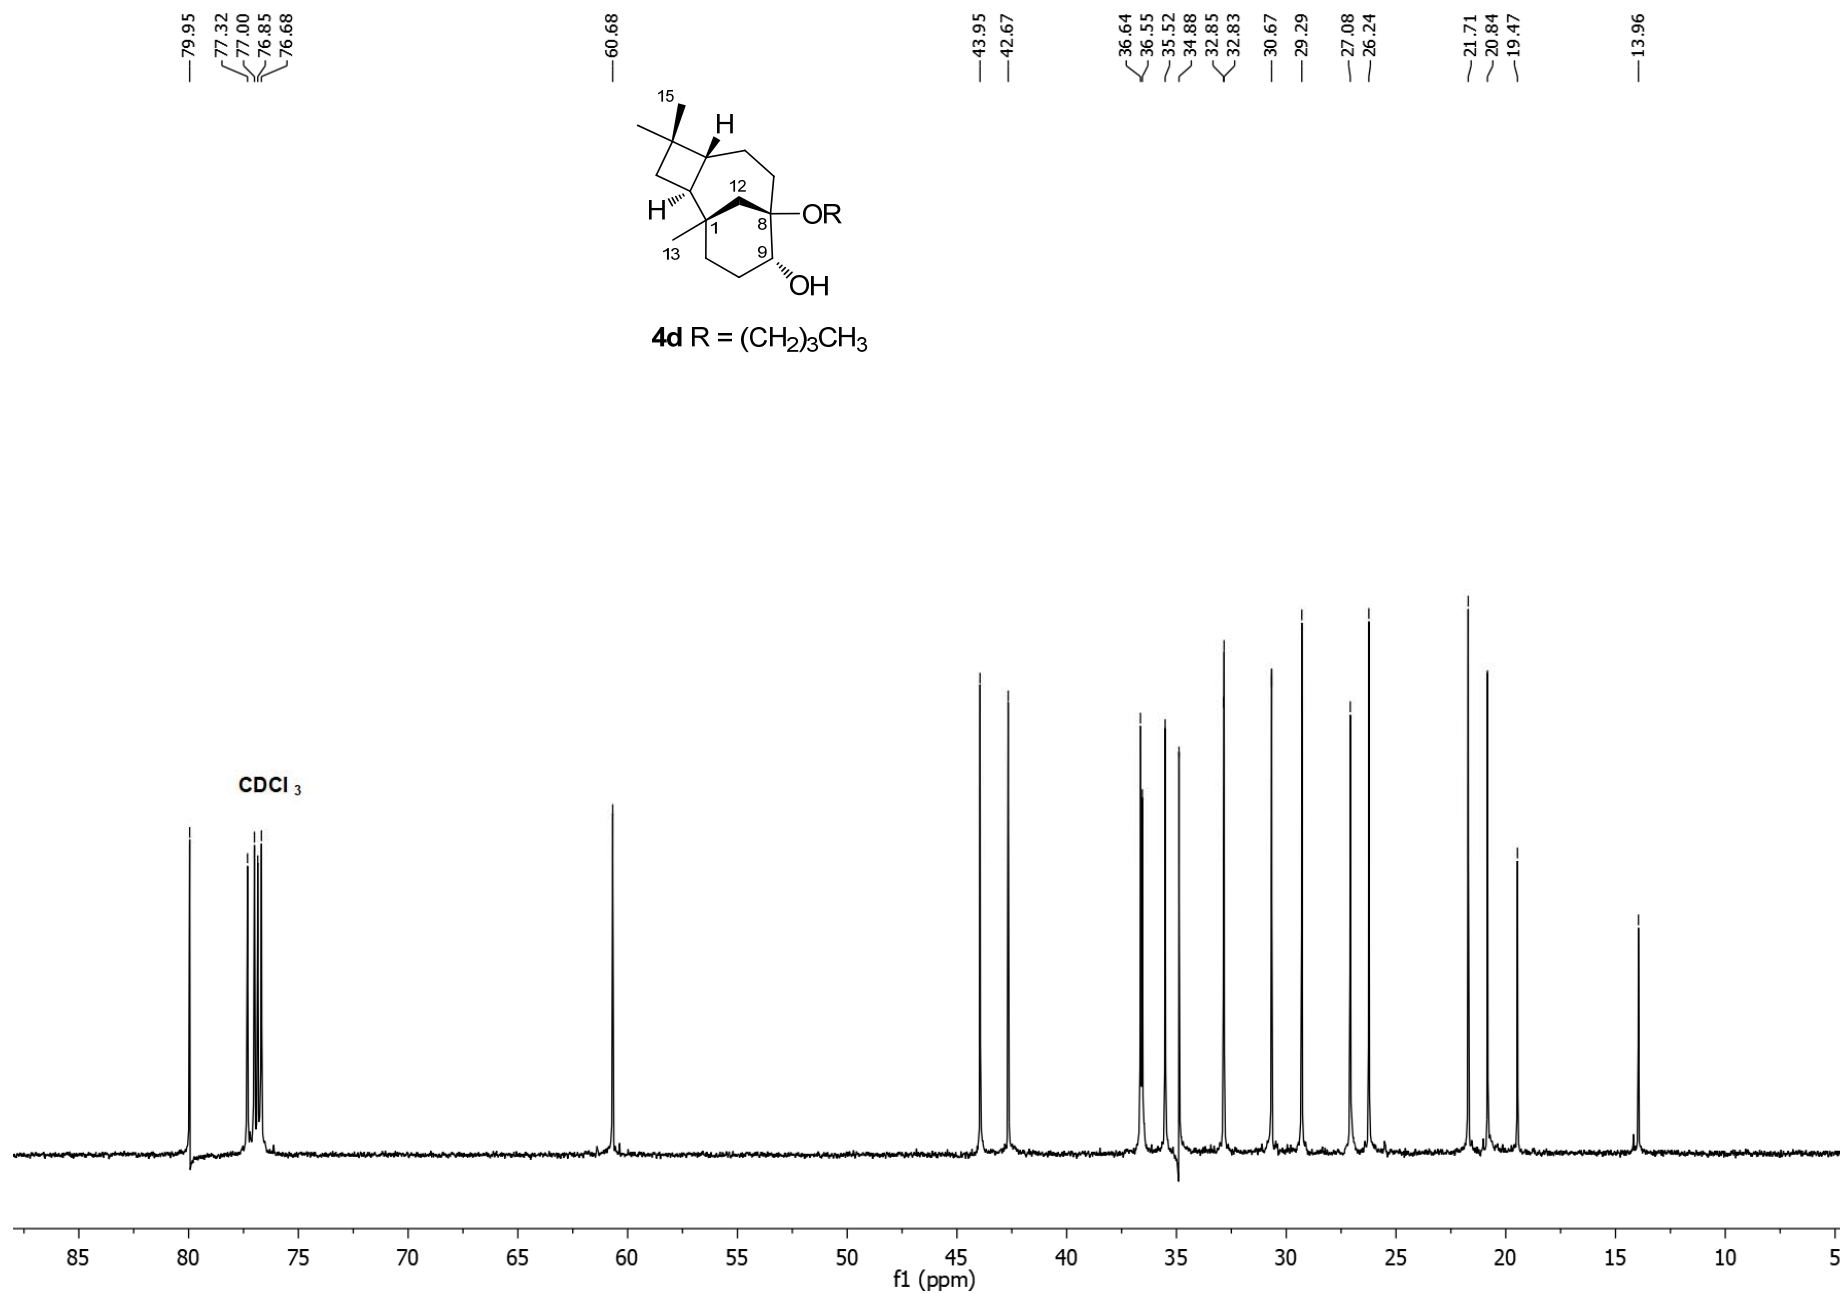

**Figure S18a.** Expansion ( $\delta_C$  85-5) of  $^{13}C$  NMR spectrum of compound **4d** in  $CDCl_3$  (100 MHz).

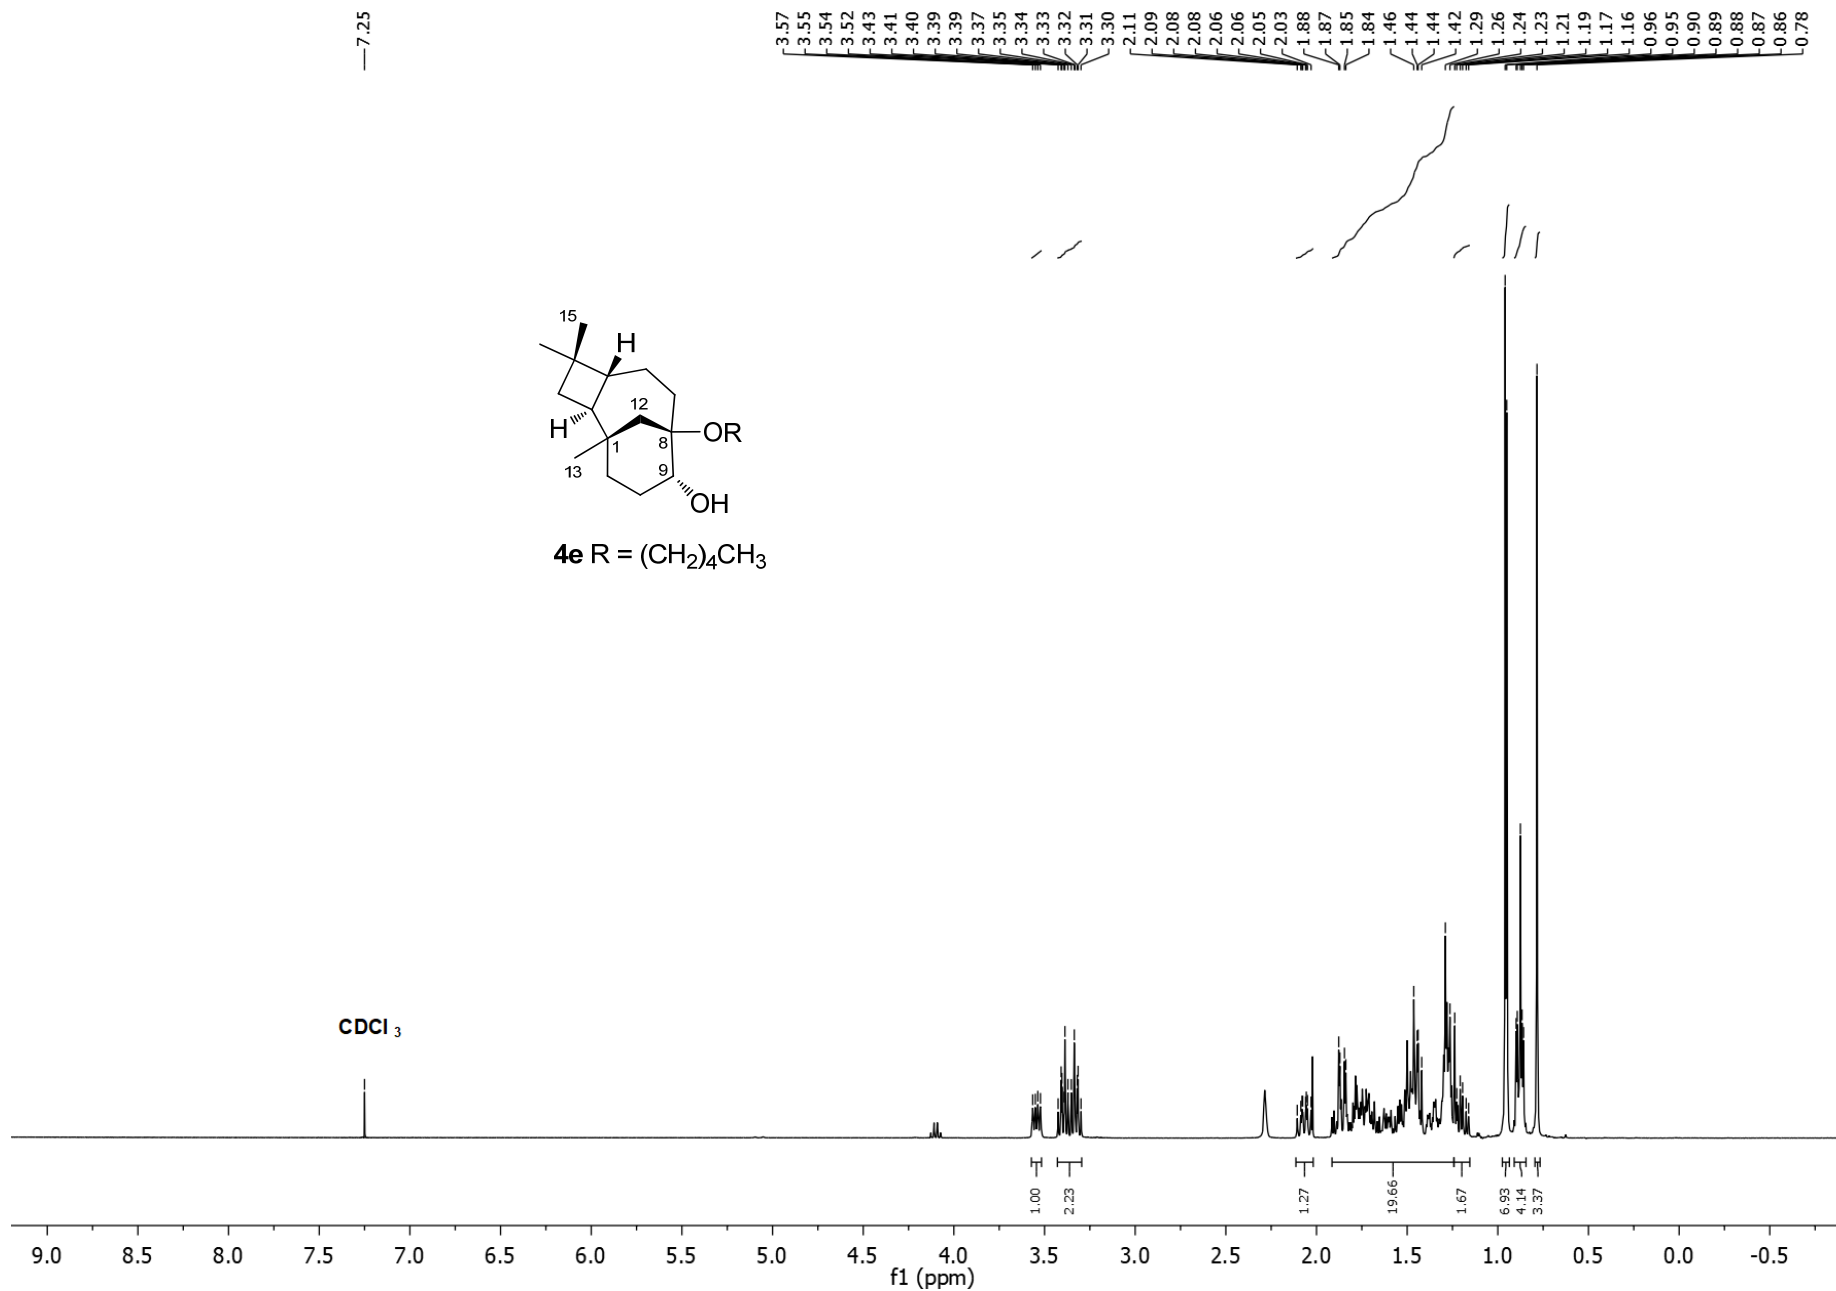

**Figure S19.**  $^1H$  NMR spectrum of compound **4e** in  $CDCl_3$  (400 MHz).

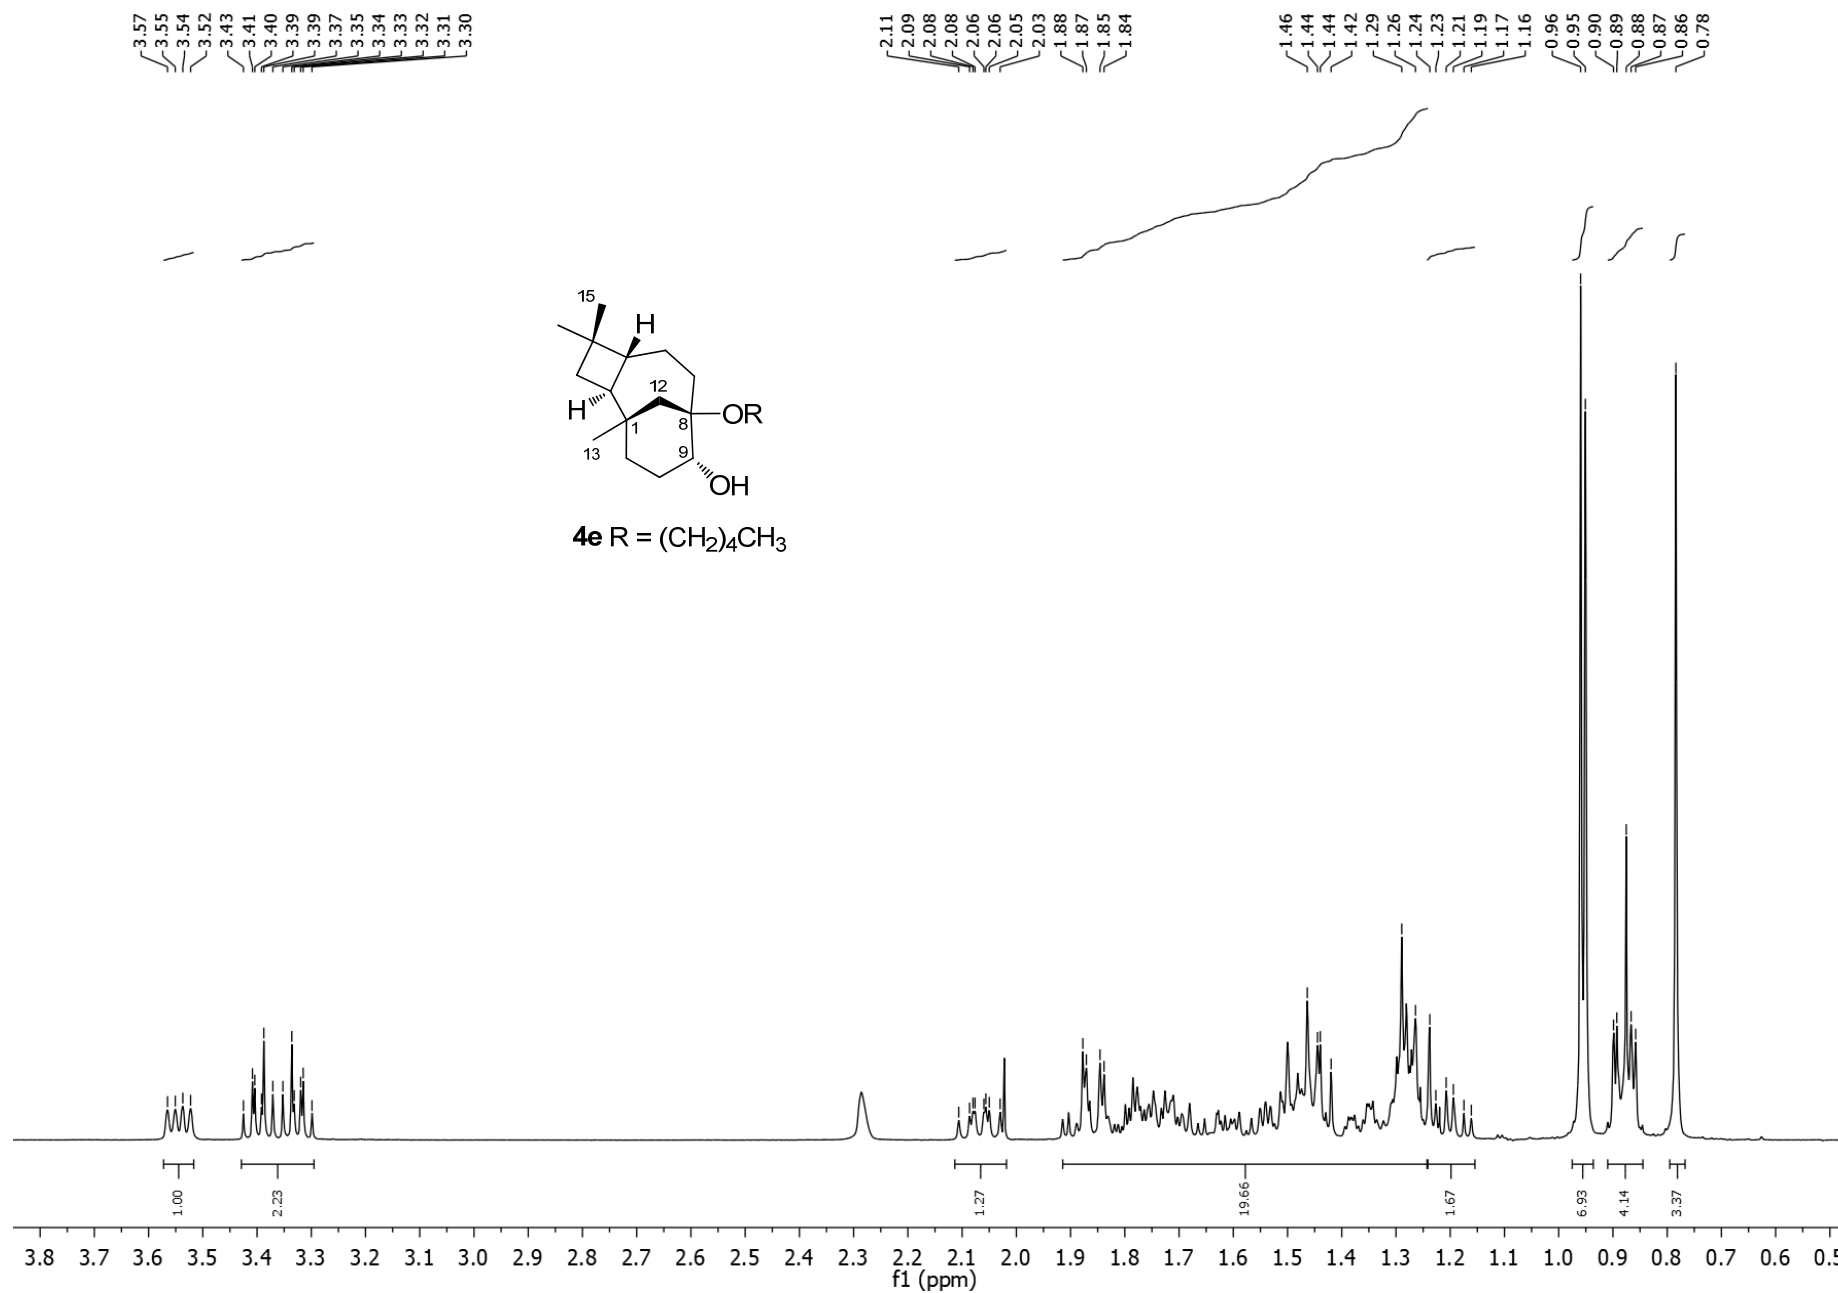

**Figure S19a.** Expansion ( $\delta_H$  3.8-0.5) of  $^1H$  NMR spectrum of compound **4e** in  $CDCl_3$  (400 MHz).

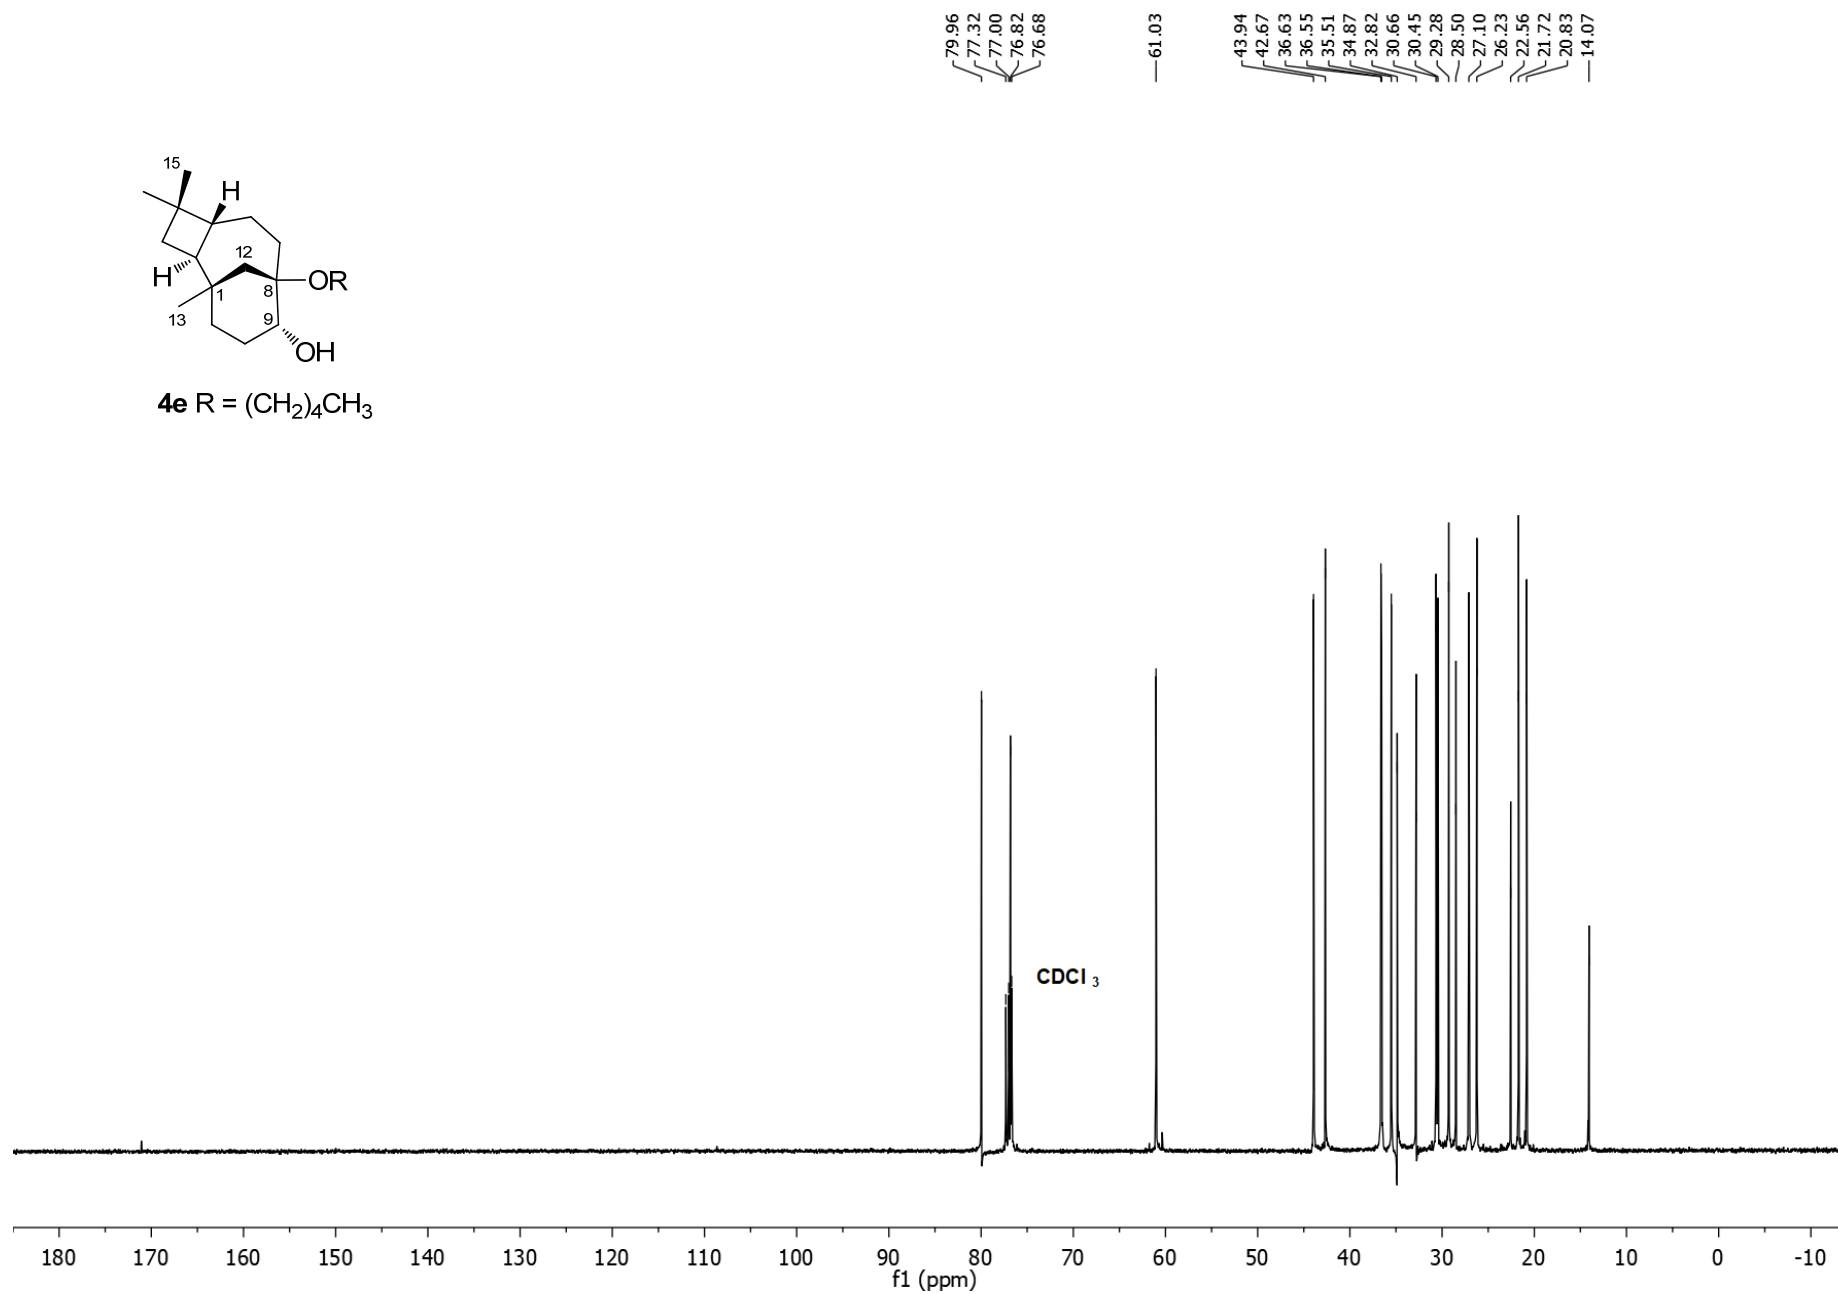

**Figure S20.** <sup>13</sup>C NMR spectrum of compound **4e** in CDCl<sub>3</sub> (100 MHz).

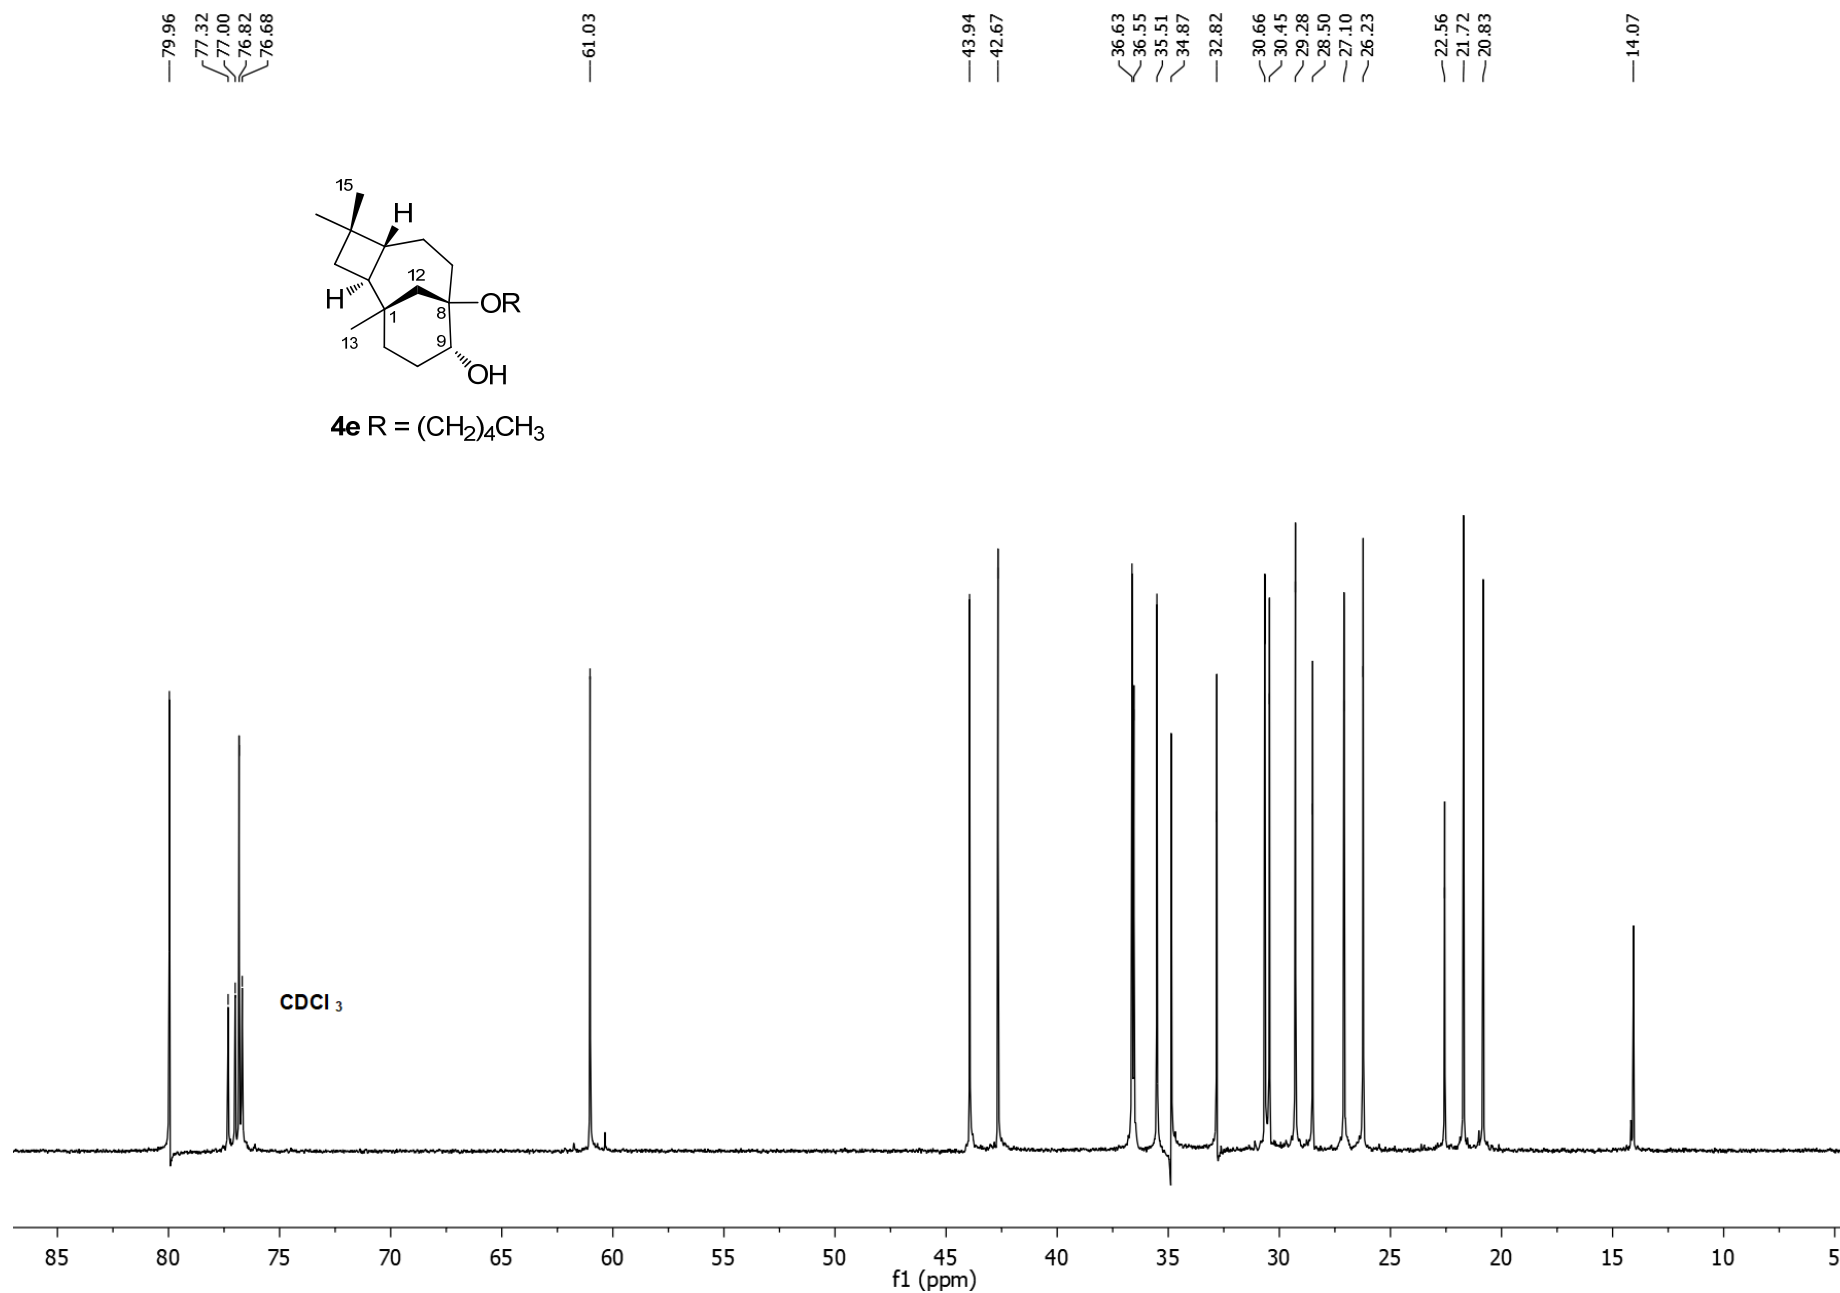

**Figure S20a.** Expansion ( $\delta_c$  85-5) of  $^{13}C$  NMR spectrum of compound **4e** in  $CDCl_3$  (100 MHz).
